# Supplementary material for: Genome-wide repression of eRNA and target gene loci by the ETV6-RUNX1 fusion in acute leukemia
Source: HighWire-hosted journal article supplement (doi:10.1101/gr.193649.115), 2016-09-12
Supplement: Supplemental_Material.docx [file Supplemental_Material.docx]

**Supplemental Material**

**Teppo et al. Genome-wide repression of eRNA and target gene loci by the ETV6-RUNX1 fusion in acute leukemia.**

Supplemental Figure Legends, p. 1-3

Supplemental Table Legends, p. 4-6

Supplemental Methods, p. 7-25

References for Supplemental Methods, p. 26-32

**Figure S1**. **Validation of the used cell lines. A)** Expression of *ETV6-RUNX1* in Nalm6-E/R cells after 24 h induction is approximately 18-fold higher as compared to expression of *E/R* in REH cells, but less than one tenth of *GAPDH* expression. Error bars represent SD for two biological replicates. **B)** A representative bar plot showing upregulation of *E/R* expression at the indicated time points as measured by RT-qPCR. A cell line expressing luciferase (Nalm6-LUC) was used as a control instead of uninduced Nalm6-E/R cells, which expressed a low level of *E/R* due to leakage of the induction system. **C)** GRO-seq signal tracks in Nalm6-E/R and Nalm6-E/Rmut cells at *ETV6* and *RUNX1* loci. Exon peaks caused by ectopic expression of *E/R* cDNA are indicated with arrows. **D)** Immunofluorescence staining with ETV6 antibody shows nuclear and cytoplasmic localization of E/R. ETV6 antibody staining is shown in green and DAPI in blue. **E)** Induction of wild-type *E/R* decreases cell proliferation relative to LUC control cells as shown in the bar plot. Proliferation was measured after 72 h of induction using the Alamar Blue reagent, and the error bars represent SD of three biological replicates. Decrease in proliferation after ectopic *ETV6-RUNX1* expression is in line with a previous study (Ford et al. 2009). **F)** A representative bar plot indicating downregulation of *E/R* by 60 % after knockdown by shRNA in REH cells (REH-shE/R). Error bars (+/-SD) represent technical variation. Gene expression was normalized to *GAPDH*.

**Figure S2. Validation of the chosen enhancer detection distance and ChIP peak counts that were used in analyses. A)** Total number of peaks that passed detection in RUNX1 ChIP-seq in HSC (GSE45144), ERG ChIP-seq in HSC (GSE45144), and RUNX1 ChIP-seq in SEM cells (GSE42075). A total of 11084 RUNX1 ChIP peaks were shared between cells in distinct differentiation state (CD34+ and CD19+). Of the top 1000 most prominent peaks in the RUNX1 ChIP-seq in SEM cells, 328 peaks were shared with HSC cells. **B)** ChIP peak enrichment in the vicinity of genes downregulated by E/R (complementary to Fig. 2B-C showing results using the 1000 most prominent peaks). Percent of indicated peaks that reside within +/- 400 kb distance from transcription start site (TSS) is shown for the all peaks, for peaks with indicated motif (ERG, FLI1, or RUNX1), and for peaks with ETS-RUNX motif. The result shows consistent enrichment with different peak cut-off values for RUNX1 ChIP in SEM cells. Hypergeometric p-value is indicated for greater or equal fold enrichment between E/R-regulated and all genes. **C)-E)** The distance of RUNX1 ChIP peaks from TSS of the nearest gene. Peak-to-gene association was analysed using the online tool GREAT (Genomic Regions Enrichment of Annotations Tool). With all detected peaks (**C** and **D**), RUNX1 binding appeared mostly distant (50-500 kb), and the result remained the same when the top 1000 peaks were used instead (**E**). **F**) Empirical cumulative probability function for the 1000 most prominent RUNX1 ChIP peaks showed that over 90 % of the peaks were located within a distance of +/- 400 kb from TSS. **G)** TF motif enrichment result within +/- 125 kb from TSS of either E/R down- or upregulated genes (motifs covering over 10 % of regions are shown). The binomial test p-value, best matching known TF motifs and % of regions with motif are indicated. Similarity score to known motifs is shown in brackets. ETS and RUNX1 motifs remained consistently enriched in the downregulated group (as in Fig. 2A).

**Figure S3. Enhancer-centric approach for detection of E/R-mediated regulation. A)** The number of annotated enhancers (regular and SEs as in Hnisz et al. 2103) and RUNX1-peaks (HSC, GSE45144; SEM, GSE42075) at which GRO-seq signal was detected using strict expression threshold (rpkm > 2.5). E/R regulation was defined as a lack of response in E/Rmut sample when the Nalm6-E/R and Nalm6-LUC cells were compared (adj. p-val < 0.1). In total, 637 of the detected regions were regulated by E/R and 190 (30 %) associated with a nearby gene (see Supplemental Table S2). **B)** Schematic representation of two analytical approaches used to detect regulation by E/R. Analyses were performed as follows: step 1, signal level quantification at annotated regions (gene/enhancer); step 2, statistical analysis of E/R 24h vs. LUC; step 3, filtering using adjusted p-value cut-off and removal of non-DNA-binding targets (E/Rmut conveyed effects); final step, data integration and correlation of signals from the enhancer and gene locus. **C)** Sample similarity was assessed by comparing expression levels at transcribed gene areas or active enhancers. Biological replicates group together in both analyses. **D)** Venn diagram of genes differentially expressed among *E/R*-positive patients in previous microarray studies (see Supplemental Methods for details of each study).

**Supplemental Table S1**. **Validation of transcriptional changes at mature transcript level (mRNA) downstream of *E/R* induction**. A set of GRO-seq detected and E/R-regulated genes of which mRNA expression level was measured with RT-qPCR. Log2-fold change values of *ETV6-RUNX1* induction (Nalm6-E/R) or knockdown (REH-shE/R) samples are shown in comparison to corresponding luciferase control samples (Nalm6-LUC or REH-shLUC) for each independent experiment.

**Supplemental Table S2**. **Significantly regulated enhancers associate with E/R-regulated gene loci**. Sheet 1 shows top 5 *de novo* detected enhancers associated with the transcript-centric genes (approach 1, as illustrated in Supplemental Fig S3 A). Euclidian distance between gene and enhancer, the presence of specified ChIP peaks and motifs, and enhancer/SE annotation in CD19+/CD20+ or CD34+ cells are indicated for each enhancer. Sheet 2 shows results for the enhancer-centric approach, which utilized annotated enhancers and RUNX1-peaks to uncover regulated genomic regions. Only results with a correlation > 0 for changes of expression at enhancer and transcript areas are shown. For details of analysis, see Methods for “Differential expression analysis of GRO-seq transcripts”.

**Supplemental Table S3. E/R-regulated super-enhancers (SE).** SE regions, as annotated in CD19+/20+ and CD34+ cells (Hnisz et al. 2013), that were regulated by E/R in GRO-seq. Approximately 65 % of the SEs were repressed.

**Supplemental Table S4. E/R-regulated *de novo* transcripts**. Each transcript is designated an *E/R* (1-57) code. The presence of RUNX1-peak in SEM cells (GSE42075) is indicated. Furthermore, histone 3 lysine 27 acetylation (K27ac), and SE annotation in CD34+ and CD19+/CD20+ cells are shown (Hnisz et al. 2013). Results from differential expression analysis using RNA sequencing data (GSE79373) are shown for *de novo* transcripts and tested annotated noncoding transcripts (see Supplemental Methods for “RNA sequencing data analysis”). Sheet 2 contains normalized counts for each transcript.

**Supplemental Table S5.** **E/R-regulated candidate genes.** Sheet 1 shows annotated transcripts regulated by E/R in GRO-seq data. Gene lists are based on comparison of Nalm6-E/R at 24 h vs. Nalm6-LUC at 24 h, with adjusted p-value cut-off of 0.05 for differential expression. Nalm6-E/Rmut effects were filtered out; thus the table indicates only DNA-binding dependent changes (Runt domain). See Supplemental Fig S3 A and Methods for more information on approach 1 (transcript-centric list) and approach 2 (enhancer-centric list). Overall, 183 transcripts were found regulated by E/R. Sheet 2 shows data on genes whose expression change was detected with both approaches. Ensembl BioMart search engine was utilized.

**Supplemental Table S6.** **Gene ontology analyses of E/R-regulated genes and eRNA regions**. Sheet 1 shows results for DAVID analysis of “transcript-centric” and “enhancer-centric” genes analyzed separately and together. Based on the GRO-seq data, background gene set was defined as genes with expression level of rpkm >1. The results with EASE (adjusted) p-value cutoff < 0.05 are shown. Sheet 2 shows results for genomic regions enrichment of annotation tool (GREAT) that was used to associate E/R-regulated enhancers to genes and pathways. Both whole genome and GRO-seq background were used separately and the results with binomial FDR < 0.005 are shown. Same ontology themes are repeated in different settings as highlighted in Fig. 5A.

**Supplemental Table S7.** **Differentially expressed genes among *E/R*-positive patients compared to other pre-B ALL subtypes in combined patient microarray data set**. The expression of differentially regulated genes in GRO-seq experiment of Nalm6-E/R cells (Supplemental Table S5) was further analyzed in combined patient microarray dataset (133 genes available). Genes whose absolute log2 expression difference between *E/R*-positive and *E/R*-negative patients was over threshold of 0.5 (adj. p-value < 0.01) in microarray data were considered altered (35 genes). Comparison between GRO-seq and RNA-seq data (GSE79373) with *E/R* (t12;21) patients compared to other subtypes is shown for the 35 tested genes. Sheet 2 contains normalized count values for each tested transcript for each sample in RNA-seq.

**Supplemental Methods**

**Cloning, virus production, transduction, and cell culture**

*ETV6-RUNX1* cDNA (a kind gift from Prof. Renate Panzer-Grümayer) was cloned without tags into inducible LentiX pLVX-Tight-Puro expression vector (Clontech, Mountain View, CA, USA) using NotI and EcoRI restriction sites. PCR was performed with Phusion HotStart II polymerase (Thermo Scientific) according to instructions using the following PCR program: initial denaturation at 98°C for 30s, 33 cycles of denaturation at 98°C for 10 s, annealing at 67°C for 30s and extension at 72°C for 35s, followed by final extension for at 72°C for 8 min. Point mutation G1553A was introduced by site-directed mutagenesis using Phusion HotStart II polymerase (Thermo Scientific) with primers indicated in the table below. PCR program for mutagenesis: initial denaturation at 98°C for 30s, 33 cycles of denaturation at 98°C for 30 s, annealing at 68°C for 30s and extension at 72°C for 8min, followed by final extension at 72°C for 7 min. The point mutation resulted in R201Q substitution in human RUNX1 protein (R518Q in ETV6-RUNX1 protein). The PCR products were gel purified using GeneJET PCR purification kit (Thermo Scientific) and double digested with EcoRI and NotI restriction enzymes (Thermo Scientific). The vector was double digested and treated with FastAP Thermosensitive Alkaline Phosphatase (Thermo Scientific). Ligation was performed using T4 DNA ligase (Thermo Scientific) and the plasmids were transformed into NEB5alpha *E.Coli* strain. Short hairpin RNA (shRNA) oligos targeting *ETV6-RUNX1* (target sequence GAATAGCAGAATGCATACTT) were cloned into pLVX-shRNA1-vector (Clontech) using EcoRI and BamHI restriction sites to generate the shE/R construct. All the constructs were verified by sequencing. Transfection grade plasmids were purified using Midiprep PureYield kit (Promega, Madison, Wisconsin, USA) and viruses were produced in HEK293T cells using HTX packaging mix and Xfect reagent (Clontech). Briefly, 4 million HEK293T cells were plated evenly onto 10 cm plates the day before to reach 80 % confluence and 7 µg of plasmid was used for one transfection reaction the following day. After 16 hours transfection, media was changed and viral media was subsequently collected after 24 and 48 hours.

Nalm6-cells (ACC 128, obtained from DSMZ, Braunschweig, Germany) were first infected with the regulatory vector TetOn Advanced and subsequently with response vector pLVX-Tight-Puro-*ETV6-RUNX1* (*E/R*), pLVX-Tight-Puro-*ETV6-RUNX1*-mutated (*E/R*mut), or pLVX-Tight-Puro-*LUC* (luciferase control) (Clontech) for 16 hours. REH cells (ACC 22, obtained from DSMZ) were co-infected with the pLVX-shE/R and viral particles targeting N-terminus of *ETV6* (clone TRCN0000003855, Sigma Aldrich, Saint Louis, MO, USA). Control cell line was produced using shRNA virus against luciferase (SCH007V, Sigma Aldrich). Stably transduced cells were selected with puromycin (0.5 µg/ml or 1 µg/ml, Clontech). Cells were cultured in RPMI (Gibco, Thermo Fisher Scientific, Waltham, MA, USA), 2 mM L-glut, 100 U penicillin, 100 µg/ml streptomycin and 10% Tet System Approved FBS (Clontech) (Nalm6-Tet-cells) or 10% FBS (Gibco) (REH) at 37°C in 5% CO2. The expression of *ETV6-RUNX1* was induced with 500 ng/ml doxycycline (Clontech) at 1 million cells/ml for indicated time points. The induced expression of *ETV6-RUNX1* was confirmed with RT-qPCR (Ssofast EvaGreen, BioRad, Hercules, CA, USA) with primers specific for the fusion (forward TGCACCCTCTGATCCTGAAC, reverse AACGCCTCGCTCATCTTGC); and Western blotting (antibody against ETV6, 0.4 µg/ml, Atlas Antibodies, Stockholm, Sweden; HPA000264, RRID:AB_611466).

**Quantitative PCR**

Total RNA was extracted from cells using GeneJET RNA Purification Kit (Thermo Fisher Scientific) and treated with DNA-free™ DNase Treatment & Removal (BioRad) to remove genomic DNA. cDNA synthesis was performed using iScpript (BioRad) with 1 µg of RNA as a starting material. RT-qPCR was performed using SsoFast EvaGreen® Supermix (BioRad) according to instructions and reactions were measured with BioRad CFX96TM Real Time System (BioRad) using the following program: initial denaturation at 96°C for 30s, 39 cycles of denaturation at 96°C for 2 s, annealing at 60°C for 5 s, and plate read. All primer sequences are listed in the table below. Quantification was done using the relative 2-ΔΔCT method (Livak and Schmittgen, 2001) and the plots were drawn using the BoxPlotR web tool (Spitzer et al. 2014). For ChIP-qPCR, enrichment was calculated with percent input method in which signals obtained from the ChIP are divided by signals obtained from an input sample. 2 % of starting chromatin was used as input.

**Primers used in PCR**

| **Cloning** | **Sequence** |
| --- | --- |
| PCR ETV6-RUNX1 forward1 | 5´- tacattgcggccgcatgtctgagactcctgctca |
| PCR ETV6-RUNX1 forward1 | 5’- aatgtagaattctcagtagggcctccacacg |
| upper strand shRNA-ETV6-RUNX1 | ggatccGAATAGCAGAATGCATACTTTTCAAGAGAAAGTATGCATTCTGCTATTCTTTTTTACGCGTgaattc |
| lower strand shRNA-ETV6-RUNX1 | gaattcACGCGTAAAAAAGAATAGCAGAATGCATACTTTCTCTTGAAAAGTATGCATTCTGCTATTCggatcc |
| **Site-directed mutagenesis for R201Q** | **Sequence** |
| mutagenesis RUNX1 R201Q forward | CACAGTGGATGGGCCCCAAGAACCTCGAAGACATC |
| mutagenesis RUNX1 R201Q reverse | GATGTCTTCGAGGTTCTTGGGGCCCATCCACTGTG |

| **RT-qPCR primers** | **sequence** |
| --- | --- |
| ETV6-RUNX1 f1 | TGCACCCTCTGATCCTGAAC |
| ETV6-RUNX1 r1 | AACGCCTCGCTCATCTTGC |
| *de novo*-loc100294145_f1 | tgcctccactgccttgaaat |
| *de novo*-loc100294145_r1 | cagcgatcctccctccttg |
| ATF5 f1 qpcr | AGTGAAAAGTGACTGGCAGGAA |
| ATF5 r1 qpcr | GGCGACACTCTTCCCTCTGA |
| CLEC14A f1 qpcr | AATCAGGGTCGACGAGAAGC |
| CLEC14A r1 qpcr | AAATCACGCTCCCTGATGGG |
| GPSM1 f1 qpcr | GACTTCAAGACAGGCGTGG |
| GPSM1 r1 qpcr | CCTTGAGTGTGTTTCCCAGGT |
| ID3 f1 qpcr | TCCTGACACCTCCAGAACG |
| ID3 r1 qpcr | CAGGCCACAAGTTCACAGTC |
| IGLL1 f1 qpcr | TCAGTGACGCATGTGTTTGGCAG |
| IGLL1 r1 qpcr | CACCAGTGTAGCCTTGTTGGCT |
| ITGA4 f1 qpcr | GCATACAGGTGTCCAGCAGAGA |
| ITGA4 r1 qpcr | AGGACCAAGGTGGTAAGCAGCT |
| KCNQ1OT1 f1 qpcr | AACTCTGAGGAGTGTTCTGT |
| KCNQ1OT1 r1 qpcr | CATAACAGCTCAAGGGAGTTCT |
| LAIR1 f1 qpcr | TGGTCTGAGCAGAGTGACTACC |
| LAIR1 r1 qpcr | GCTCATTGTGACTGTTGTCCGAC |
| LAT2 f1 qpcr | CAGTTCTTGGAAACCCACTCG |
| LAT2 r1 qpcr | GTTGGTCCTCACGCAGACT |
| LOC728175 f1 qpcr | GTACTCGGACTTCACGTGGA |
| LOC728175 r1 qpcr | CACCTGGCCTGTAGTTGGTA |
| PALD1 f1 qpcr | GCGAAGTTGGGAGGAGCGA |
| PALD1 r1 qpcr | TGGCCGTTGTACCCATAGTCT |
| PHLDA1 f1 qpcr | GGGCAAGACAAGGTTTTGAGGA |
| PHLDA1 r1 qpcr | TCGCAAGTTTTCAGTAGGGTGA |
| PRKY f1 qpcr | CCCTCGGCATCCTGATATTCG |
| PRKY r1 qpcr | GTTGGAAGTGTCGCCGTTG |
| RASD1 f1 qpcr | CCACCGCAAGTTCTACTCCA |
| RASD1 r1 qpcr | AAAACGTCTCCTGTGAGGATGG |
| RASGRP2 f1 qpcr | GGTTTGCATTCTGGGGTGGA |
| RASGRP2 r1 qpcr | CACCTTCCCGGAGTCATCGAA |
| RMND5B f1 qpcr | GCAGAAACTGGCTTCGGACCAT |
| RMND5B r1 qpcr | ACCGCATCTGACACAACACCAC |
| SGK223 f1 qpcr | GAAAGCCTCAGCCCATCCTT |
| SGK223 r1 qpcr | CTGAAGGAAACGGAACGGGA |
| SOCS2 f1 qpcr | GGTCGGCGGAGGAGCCATCC |
| SOCS2 r1 qpcr | GAAAGTTCCTTCTGGTGCCTCTT |
| FPGS f1 qpcr | GAGCCGAGCATGGAGTACC |
| FPGS r1 qpcr | GATGTTCAGCCGGTCCAAGT |
| GAPDH f1 qpcr | TCCATGACAACTTTGGTATCGTGG |
| GAPDH r1 qpcr | GACGCCTGCTTCACCACCTTCT |
| HMBS f1 qpcr | cgcatctggagttcaggagta |
| HMBS r1 qpcr | ccaggatgatggcactga |
| **Sequencing primers** | **sequence** |
| Seq(pLVX-TiPu-ETV6RUNX1)-F1 | atgtcgaggtaggcgtgta |
| Seq(pLVX-TiPu-ETV6RUNX1)-F2 | ccaccattgaactgttgcac |
| Seq(pLVX-TiPu-ETV6RUNX1)-F3 | cccaggcaagatgagcga |
| Seq(pLVX-TiPu-ETV6RUNX1)-F4 | cactgcctttaaccctcagc |
| Seq(pLVX-TiPu-ETV6RUNX1)-F5 | ggctcctaccagttctccat |
| Seq(pLVX-TiPu-ETV6RUNX1)-R1 | cggtggatgtggaatgtgtg |
| Seq(pLVX-TiPu-ETV6RUNX1)-R2 | cgtcggggagtaggtgaag |
| Seq(pLVX-TiPu-ETV6RUNX1)-R3 | gttcttcatggctgcggtag |
| Seq(pLVX-TiPu-ETV6RUNX1)-R4 | tcaggatcagagggtgcat |
| Seq(pLVX-TiPu-ETV6RUNX1)-R5 | cgtcatccctgctccagtaa |
| Seq(pLVX-shRNA)-F1 | tttcttgggtagtttgcagtttt |
| Seq(pLVX-shRNA)-R1 | cggtggatgtggaatgtgtg |

| **qPCR primers for genomic DNA** | **sequence** |
| --- | --- |
| eITGA4_f1 | GCTAGCCTGCTCACGCAT |
| eITGA4_r1 | AAGACCCACATCTCAGCACC |
| gGAPDH_f1 | CACAGTCCAGTCCTGGGAAC |
| gGAPDH_r1 | TAGTAGCCGGGCCCTACTTT |

**Western blotting**

Proteins were extracted with NE-PER nuclear and cytoplasmic extraction kit (Pierce, Life Technologies, Waltham, MA USA) as instructed by the manufacturer, and protein concentration was measured using detergent compatible (DC) protein assay (BioRad). 10 µg of nuclear fraction was loaded onto 12 % SDS-PAGE gel under reducing conditions and separated by size. Subsequently the proteins were transferred to a nitrocellulose membrane. Blocking was performed with 5% BSA in PBS-Tween-20 (0.05 %). The membrane was incubated with the primary antibody (anti-ETV6, HPA000264, RRID:AB_611466, 0.4 µg/ml) at +4 °C overnight, washed and incubated with the anti-rabbit-HRP secondary antibody (1:2000) (Dako, Agilent Technologies, Santa Clara, CA, USA). Anti-H3 (abID#12079) (Abcam, Cambridge, UK) at a dilution of 1:100000 was used as a loading control. Enhanced chemiluminescent (ECL, Life Technologies) substrate was used to detect horseradish peroxidase (HRP) activity and the membranes were imaged using charge coupled device camera (ChemiDoc XRS, BioRad).

**Chromatin immunoprecipitation**

After 24 h induction of either *ETV6-RUNX1*, mutated *ETV6-RUNX1* or LUC, 2x107 cells per immunoprecipitation were harvested and cross-linked. Crosslinking was performed first using 1.5 mM final concentration of ethylene glycol bis[succinimidylsuccinate] (EGS) (Thermo Fisher Scientific) for 5 min, and subsequently with 11 % formaldehyde (1.1 % final concentration) (J.T. Baker, Avantor, Center Valley, PA, USA) at room temperature (RT). Crosslinking was quenched with glycine (0.125 M final concentration) (Sigma Aldrich) for 5 min at RT before centrifugation (450 x g 10 min), and subsequently washed two times with PBS.

Two antibodies against ETV6 were pooled and used to detect ETV6-RUNX1 binding: sc-166835 (Santa Cruz Biotechnology Inc., Dallas, TX, USA; RRID:AB_2101020) and HPA000264 (Atlas Antibodies, RRID:AB_611466). Antibodies were bound to Dynabead protein G magnetic beads (Novex by Life Technologies). 10 million cells were lysed (50 mM HEPES, 140 mM NaCl, 1 mM EDTA, 10 % glycerol, 0.5 % IGEPAL CA-630, 0.25 % Triton X-100, 1x Complete protease inhibitor) and sonicated in buffer (10 mM Tris pH 8, 100 mM NaCl, 1 mM EDTA, 0.5 mM EGTA, 0.1 % sodium deoxycholate, 0.5 % N-lauryl sarcosine, 1x Complete protease inhibitor) using Covaris™ S220 (Covaris Inc., Woburn, MA, USA). Antibody bound beads were incubated with sonicated cell lysates at +4°C overnight. Chromatin fragments attached to antibody beads were collected with magnet, washed several times, after which DNA was reverse crosslinked at 65°C. Samples were treated with RNAse and proteinase K, purified, precipitated and resuspended in 10 mM Tris. The quantity of purified DNA was measured with NanoDrop and the size was analyzed using agarose gel electrophoresis.

**Nuclei extraction for GRO-seq**

The nuclei isolation was performed as previously described (Wang et al. 2011), yielding ~5×106 nuclei per condition. The nuclei were extracted from 10 million cells in cold conditions. The cells were suspended in 10 ml of swelling buffer (10 mM Tris-HCl, 2 mM MgCl2, 3 mM CaCl2 and 2 U/ml SUPERase In (Ambion) RNAse inhibitor) and let swell for 5 minutes. The cells were pelleted for 10 min at 400 x g and resuspended in 500 µl of swelling buffer supplemented with 10 % glycerol. Subsequently, 500 µl of swelling buffer supplemented with 10 % glycerol and 1 % Igepal was added drop by drop to the cells while being vortexed gently. Nuclei were washed twice with 10 ml of swelling buffer supplemented with 0.5 % Igepal and 10 % glycerol, and once with 1 ml of freezing buffer containing 50 mM Tris-HCl pH 8.3, 40% glycerol, 5 mM MgCl2 and 0.1 mM EDTA. Nuclei were counted and centrifuged at 900 x g for 6 min and suspended to a concentration of 5 million nuclei per 100 µl of freezing buffer. The nuclei were snap-frozen and stored -80°C until run-on reactions.

**GRO-seq assay**

The nuclear run-on reaction buffer (NRO-RB; 496 mM KCl, 16.5 mM Tris-HCl, 8.25 mM MgCl2 and 1.65 % Sarkosyl (Sigma)) was pre-heated to 30°C. Then each ml of the NRO-RB was supplemented with 1.5 mM DTT, 750 μM ATP, 750 μM GTP, 4.5 μM CTP, 750 μM Br-UTP (Santa Cruz Biotechnology, Inc., Dallas, Texas, U.S.A.) and 33 μl of SUPERase Inhibitor. 50 μl of the supplemented NRO-RB was added to 100 μl of nuclei samples, thoroughly mixed and incubated for 5 min at 30°C. GRO-seq libraries were subsequently prepared as previously described (Wang et al. 2011). Briefly, the run-on products were treated with DNAse I according to the manufacturer’s instructions (TURBO DNA-free Kit, Invitrogen, Life Technologies), base hydrolyzed (RNA fragmentation reagent, Ambion, Life Technologies), end-repaired and then immuno-purified using Br-UTP beads (Santa Cruz, CA, USA). Subsequently, a poly-A tailing reaction (PolyA polymerase, New England Biolabs, Ipswich, MA, USA) was performed according to manufacturer instructions, followed by circularization and re-linearization. The cDNA templates were PCR amplified (Illumina barcoding) for 11 cycles and size selected to 180-300 bp length. The ready libraries were quantified (Qubit dsDNA HS Assay Kit on a Qubit fluorometer, Life Technologies) and pooled for 50 bp single-end sequencing with Illumina Hi-Seq2000 (GenCore, EMBL Heidelberg, Germany).

**Processing of GRO-seq and ChIP-seq reads**

GRO-seq reads were trimmed to remove A-stretches originating from the library preparation using the Homer software (homerTools trim) and, from the resulting sequences, those shorter than 25 bp were discarded. The ChIP-seq data from human HSC and SEM cells (originally mapped to hg18) was re-analyzed starting from raw reads. The ChIP-seq data (GSE42075, Wilkinson et al. 2013; GSE45144, Beck et al. 2013) was downloaded from the NCBI SRA database and converted to fastq format with the fastq-dump.2.3.2 tool. The quality of raw sequencing reads (GRO-seq and ChIP-seq) was confirmed using the FastQC tool (http://www.bioinformatics.babraham.ac.uk/projects/fastqc/) and subsequently bases with poor quality scores were trimmed (requiring a minimum 97 % of all bases in one read to have a min phred quality score of 10) using the FastX toolkit (http://hannonlab.cshl.edu/fastx_toolkit/). Subsequently, samples sequenced on multiple lanes were pooled. The Bowtie software bowtie-0.12.9v0.1.x (Langmead et al. 2009) was used for aligning the reads to the human genome (version hg19). For the GRO-seq reads this step was preceded by removing reads mapping to rRNA regions (AbundantSequences as annotated by iGenomes). Up to two mismatches and up to three locations were accepted and the best alignment was reported for each read. Next, reads overlapping so called blacklisted regions (unusual low or high mappability as defined by ENCODE, ribosomal and small nucleolar RNA, snoRNA, loci from ENCODE and further manually curated for the human genome) were discarded (bed file with sequences is available upon request). The HOMER v4.3 (<http://homer.salk.edu/homer>) was used for visualization and further processing. bedGraph and bigWig files were generated with reads in each sequencing experiment normalized to a total of 107 mapped reads. The bigWig files were further converted to track hubs and visualized as strand-specific, overlaid MultiTracks on a custom Track Hub in the UCSC Genome browser. The GRO-seq data is deposited in Gene Expression Omnibus (http://www.ncbi.nlm.nih.gov/geo/) under accession number GSE67519.

**Genomic regions used in analysis**

*ChIP-seq:* Peak detection was performed using HOMER program findPeaks (<http://homer.salk.edu/homer/ngs/peaks.html>). The enrichment of TF motifs near E/R-regulated genes was tested with less stringent peak proportions (Supplemental Fig S2 B). RUNX1-binding was examined to occur mostly at distal regions from TSS (Supplemental Fig S2 C-F), with 90 % of the reported binding sites residing within 400 kb distance from annotated genes. This distance cut-off was used when determining enhancer characteristics near E/R-regulated transcripts. Supplemental Fig S2 G shows the TF motif enrichment result with +/- 125 kb distance for comparison.

*GRO-seq: De novo* transcripts were identified using the HOMER program findPeaks.pl. The microRNA pre-miRNA coordinates retrieved from miRBase (version 20) were matched with the putative pri-miRNA transcripts discovered with findPeaks using strand-specific intersecting with the BEDTools Suite (<http://bedtools.readthedocs.org/en/latest/content/bedtools-suite.html>). Intragenic microRNAs were reported based on their host gene transcript. Remaining transcripts with >5 kb length were considered as candidate novel loci. E/R-regulated *de novo* transcripts were further manually annotated to be either alternative TSSs, eRNAs (representing the most abundantly expressed eRNAs), antisense transcripts, promoter-associated transcripts, or novel intergenic transcripts. In order to detect transcripts that could correspond to eRNAs produced at active enhancers, novel transcripts <15 kb in length were considered. They were assigned into two different enhancer subgroups: those separated from annotated transcript areas at least by 1500 bp based on TSS and TTS coordinates (intergenic enhancers) and transcripts antisense in gene areas (intragenic enhancers). Furthermore, a distinction between uni- and bidirectional eRNA transcripts was made. eRNAs on opposite DNA strands that are separated by a maximal 1000 bp window were annotated as bidirectional enhancers. The remaining eRNA transcripts were centered based on the eRNA start positions and extended +/–250 bp.

**TF motif enrichment analysis**

The transcript-centric analysis was coupled with TF motif enrichment analysis at bidirectional, unidirectional and intragenic enhancers +/- 400 kb from significantly regulated genes. This distance cut-off was selected based on genome-wide profiles of RUNX1 binding (see Supplemental Fig S2 C-F). The positive and negative strands at candidate enhancers were quantified separately, and those expressed at least at rpkm 0.5 level and log2(1.5)-fold change between two E/R 24 h and LUC 24 h conditions were kept for analysis. If only one stranded-signal was quantified, the additional requirement that the region overlapped with annotated open chromatin regions (based on data described in Supplemental Methods) was applied. Detection of enriched TF binding motifs was performed using the HOMER program findMotifsGenome.pl with the binomial test (<http://homer.salk.edu/homer/motif/>).

**Quantifying primary transcript levels using GRO-seq reads**

For quantification of transcript levels, the genomic coordinates for all RefSeq transcripts were retrieved from the iGenomes database (Illumina, San Diego, California, U.S.A.). Additionally, non-overlapping *de novo* transcripts found based on the GRO-seq signal (as described above) were included. In order to specifically quantify primary transcription, strictly intronic regions were used in analysis for each known transcript. If no intron was found or the total intron length spanned less than 500 bp the gene area was quantified instead. Moreover, the number of mappable base pairs within the region, based on mappability tracks available from the ENCODE dataset (<http://genome.ucsc.edu/ENCODE/>), was used in rpkm calculations.

In order to quantify eRNA abundance in ChIP-seq mapped TF binding sites, the HOMER annotatePeaks.pl program was used with the parameters -size 2000, -hist 25 to analyze the GRO-seq signal density at a 2 kb window around the TF binding sites. Prior to analysis, the TF peak ChIP-seq files were centered by the respective TF motif.

**Annotation data for open-chromatin regions**

The following files available from ENCODE or GEO were used to form a combined file of putative open chromatin areas, which served as a filter for *de novo* identified unidirectional candidate enhancers.

| wgEncodeHaibTfbsGm12878P300Pcr1xPkRep1.broadPeak |
| --- |
| wgEncodeHaibTfbsGm12878P300Pcr1xPkRep2.broadPeak, |
| wgEncodeSydhTfbsGm12878P300sc584IggmusPk.narrowPeak |
| wgEncodeSydhTfbsGm12878P300IggmusPk.narrowPeak |
| wgEncodeSydhTfbsGm12878P300bStdPk.narrowPeak |
| wgEncodeUwDnaseGm12878HotspotsRep1.broadPeak |
| wgEncodeUwDnaseGm12878HotspotsRep2.broadPeak |
| wgEncodeBroadHistoneGm12878H3k27acStdPk.broadPeak |
| wgEncodeBroadHistoneGm12878H3k04me1StdPkV2.broadPeak |
| wgEncodeBroadHistoneCd20ro01794H3k27acPk.broadPeak |
| wgEncodeUwDnaseCd20ro01778HotspotsRep1.broadPeak |
| wgEncodeUwDnaseCd20ro01778HotspotsRep2.broadPeak |
| wgEncodeOpenChromDnaseNaivebcellPk.narrowPeak, |
| GSM971340_Naive_B_cells-H3K4me1.islands.txt |
| wgEncodeSydhHistonePbmcH3k4me1UcdPk.narrowPeak |
| wgEncodeUwDnaseCd34mobilizedHotspotsRep1.broadPeak |
| GSM971334_CD34-p300.bsites.txt |
| GSM722716_t8.21-2-DNaseSeq_peaks.txt |
| GSM722715_t8.21-1-DNaseSeq_peaks.txt |
| GSM722714_non-t8.21_DNaseSeq_peaks.txt |
| GSM722713_Kasumi1_DNaseSeq_peaks.txt |
| GSM722708_RUNX1_non-t8.21_ChIPSeq_peaks.txt |
| GSM722708_RUNX1_non-t8.21_ChIPSeq_peaks.txt |
| GSM722705_RUNX1-ETO_control_ChIPSeq_peaks.txt |
| GSM722704_RUNX1_ChIPSeq_peaks.txt |

**Gene enrichment analysis**

Genomic regions enrichment of annotation tool (GREAT, McLean et al. 2010) was utilized to predict functions of putative E/R-regulated cis-regulatory regions as discovered by the enhancer-centric analysis. The association rule basal plus extension (proximal 5 kb upstream, 1 kb downstream, plus distal up to 1000 kb) was used to associate enhancers to nearby genes. Both whole genome and GRO-seq background (all detected eRNAs with expression cut-off rpkm 2.5) were used separately as backgrounds. The results with binomial FDR < 0.005 for GO Biological Process, Mouse phenotype, MSigDB Cancer neighborhood and MSigDB Pathways are reported in Supplemental Table S6.

Functional annotation analysis was performed on E/R-regulated coding transcripts using DAVID functional annotation tool (Huang et al. 2009). The “transcript-centric” and “enhancer-centric” gene lists (see Supplemental Table S5 for genes) were analyzed both separately and combined. The list of all detected transcripts in GRO-seq with expression level cut-off rpkm1 was used as a background (6049 Entrez IDs). Results for enrichment in biological process (BP-FAT), cellular compartment (CC-FAT), molecular function (MF-FAT), KEGG-, REACTOME-, and BIOCARTA pathways, and SP-PIR keywords (all with p-value < 0.05 if not stated otherwise) are reported in Supplemental Table S6.

**Reported microarray works**

**Table.** Published microarray data sets on *E/R*-positive patients (see also Supplemental Fig S3 C).

| **Journal** | **Patients** | **Chip** | **Number of genes reported** | **Notes** |
| --- | --- | --- | --- | --- |
| Yeoh et al. 2002,  Cancer Cell | Total 327  ETV6-RUNX1 79 | Affymetrix HG-U95Av2 | 40 |  |
| Ross et al. 2003,  Blood | Total 132 | Affymetrix HG-U133A, HG-U133B | 100 + 100 | Same patients as Yeoh et al. 2002 (subset) |
| Fine et al. 2004,  Blood | Total 37  ETV6-RUNX1 14 | N/A | 13 reported in article | Supplemental material inaccessible |
| Andersson et al. 2005, PNAS | Total 121  ETV6-RUNX1 20 | Swegene DNA Microarray Resource Center 27K slides | 200 |  |
| van Delft et al. 2005, British Journal of Haematology | Total 77  ETV6-RUNX1 14 | Affymetrix HG-U133A | 8 reported in article | Supplemental material inaccessible |
| Andersson et al. 2007, Leukemia | Total 121  ETV6-RUNX1 20 | Swegene DNA Microarray Resource Center 27K slides | 32 | Same patients as Andersson et al. 2005 |
| Gandemer et al. 2007, BMC Genomics | Total 60  ETV6-RUNX1 16 | Agilent G4112A 44K | 14 |  |

**Proliferation assay**

Cells were counted and plated at 1 million/ml on 6 well plates. Doxycycline (Clontech) was added at 500 ng/ml to induce *ETV6-RUNX1*, mutated *ETV6-RUNX1* or luciferase expression in Nalm6 cells. After 24 hours, the cells were counted and 10 000 cells were plated in 100 µl in 96 well plate wells. Doxycycline treatment was continued in the induction samples. Cells were allowed to grow for 24, 48 or 72 hours after which 10 µl Alamar Blue reagent (Life technologies) was added to each well. Fluorescence was measured after 2 hours with excitation 560 nm and emission 590 nm using Tecan fluorometer Infinite 200 (Tecan, Switzerland). Four technical replicates per sample were included in each experiment.

**Immunofluorescence staining**

50 000 cells were counted, spun onto Superfrost slides, fixed with 4 % paraformaldehyde in PBS for 20 min, permeabilized with 0.2 % Triton X-100 in PBS and blocked with 1 % BSA-PBS at 37°C for 30 min. Samples were washed with PBS after each step. Primary antibody against ETV6 (Atlas Antibodies, HPA000264, RRID:AB_611466) was incubated at 1 µg/ml for 1 hour at 37°C. Secondary antibody Alexa Fluor 488 anti-rabbit (Life Technologies) was added at 1:800 for 60 min at 37°C. Slides were mounted with Vectashield (Vector Labs) containing DAPI and imaged with Olympus BS60.

**Combined hematological microarray data set**

The microarray data sets were retrieved from the NCBI GEO database and combined, representing both healthy and malignant samples and hybridized to Affymetrix GeneChip Human Genome U133 Plus 2.0 array. Using metadata, the combined data set was manually annotated in a congruent manner to facilitate cross-study comparison of gene expression. Probe-level quality control was performed to exclude samples with very high difference in data location or distribution as measured by median and interquartile range of raw probe intensities. Samples with a median deviating more than 1.5 in log2-scale from the median of all medians were deemed outliers and filtered out as well as those with an IQR deviating more than 0.75 from the median of IQRs. The 9544 samples that passed this filtering were processed using the RMA probe summarization algorithm with probe mapping to Entrez Gene IDs (from BrainArray version 18.0.0, ENTREZG). Finally, to correct for technical differences we employed the bias-correction method (Eklund and Szallasi, 2008). Mann-Whitney *U* test was used for statistical testing of differential expression, and false discovery rate estimation for multiple testing was carried out as proposed by Storey (2002). Of the 6049 genes that passed the rpkm 1 expression cut-off in GRO-seq, expression data for 5674 genes was available from the microarray studies. Differential expression was defined by a minimum absolute log2-fold change between group medians of 0.5 and maximum q-value of 0.01.

Number of patients from different pre-B-ALL subtypes or cell type samples in each data set that were used for the combined microarrays are indicated below.

**Table.** Number of patients in separate data sets. t(12;21) represents the *E/R*-positive subtype. MLL= MLL rearranged, HD = hyperdiploid, HSC = hematopoietic stem cells.

| **GSE accession number** | **t(12;21)** | **t(1;19)** | **t(9;22)** | **MLL** | **HD** | **HSC** | **Naive B-cell** | **Sum** | **Reference** |
| --- | --- | --- | --- | --- | --- | --- | --- | --- | --- |
| GSE13159, GSE13204 | 37 | 35 | 116 | 43 | 39 | 0 | 0 | 270 | Kohlmann et al.2008; Haferlach et al. 2010; Kuhnl et al. 2010 |
| GSE13351 | 24 | 2 | 1 | 4 | 28 | 0 | 0 | 59 | Den Boer et al. 2009; Stam et al. 2010 |
| GSE19475 | 0 | 0 | 0 | 58 | 0 | 0 | 0 | 58 | Stam et al. 2010; Stumpel et al. 2011; Stumpel et al. 2012 |
| GSE13576 | 25 | 1 | 3 | 2 | 21 | 0 | 0 | 52 | Meyer et al 2011. |
| GSE10792 | 19 | 0 | 6 | 26 | 0 | 0 | 0 | 51 | Bungaro et al. 2009 |
| GSE11877 | 2 | 23 | 0 | 21 | 0 | 0 | 0 | 46 | Kang et al. 2010; Harvey et al. 2010 |
| GSE17459 | 8 | 3 | 4 | 3 | 9 | 0 | 0 | 27 | Hertzberg et al. 2010 |
| GSE7440 | 8 | 9 | 6 | 4 | 0 | 0 | 0 | 27 | Bhojwani et al. 2008 |
| GSE2677 | 6 | 0 | 0 | 0 | 15 | 0 | 0 | 21 | Schmidt et al. 2006 |
| GSE7757 | 4 | 2 | 6 | 1 | 4 | 0 | 0 | 17 | Campo Dell’ Orto et al. 2007 |
| GSE18497 | 4 | 0 | 0 | 0 | 12 | 0 | 0 | 16 | Staal et al. 2010 |
| GSE14062 | 0 | 0 | 0 | 14 | 0 | 0 | 0 | 14 | Zangrando et al. 2009 |
| GSE24739 | 0 | 0 | 0 | 0 | 0 | 8 | 0 | 8 | Affer et al. 2011 |
| GSE14834 | 0 | 1 | 3 | 2 | 0 | 0 | 0 | 6 | Fulci et al. 2009 |
| GSE12195 | 0 | 0 | 0 | 0 | 0 | 0 | 5 | 5 | Compagno et al. 2009; Basso et al. 2010; Pasqualucci et al. 2011; Challa-Malladi et al. 2011 |
| GSE12662 | 0 | 0 | 0 | 0 | 0 | 5 | 0 | 5 | Payton et al. 2009 |
| GSE13300 | 0 | 0 | 0 | 0 | 0 | 0 | 4 | 4 | Isnardi et al. 2009 |
| GSE17054 | 0 | 0 | 0 | 0 | 0 | 4 | 0 | 4 | Majeti et al. 2009 |
| GSE17269 | 0 | 0 | 0 | 0 | 0 | 0 | 4 | 4 | Rakhmanov et al. 2009 |
| GSE12366 | 0 | 0 | 0 | 0 | 0 | 0 | 3 | 3 | Longo et al. 2009 |
| GSE12453 | 0 | 0 | 0 | 0 | 0 | 0 | 3 | 3 | Brune et al. 2008; Giefing et al. 2013 |
| GSE8023 | 0 | 0 | 0 | 0 | 0 | 3 | 0 | 3 | Krejci et al. 2008 |
| GSE16745 | 0 | 0 | 0 | 0 | 0 | 1 | 0 | 1 | Kandilci et al. 2009 |
| **Sum** | 137 | 76 | 145 | 178 | 128 | 21 | 19 |  |  |

**RNA sequencing data analysis**

Publically available RNA-seq data for 17 primary BCP-ALL patients was obtained from the Gene Expression Omnibus dataset GSE79373, containing nine BCP-ALL patients harboring the ETV6-RUNX1 fusion gene and eight BCP-ALL patients without ETV6-RUNX1 (HeH n=7, other subtype n=1). Aligned reads were summarized using featureCounts (Liao et al. 2014). Differential expression was performed using the DESeq2 package in R (Love et al. 2014). A set of 35 E/R-regulated protein coding genes - based on the comparison between GRO-seq data and the combined microarray analysis - was analyzed for differences in expression levels in the patients with t(12;21). For noncoding transcripts, a set of 421 loci containing altered potential *de novo* transcript coordinates in different comparisons (Nalm6-E/R 4 h, 12 h, 24 h vs. Nalm6-E/R 0h; Nalm6-E/R 0 h, 4 h, 12 h, 24 h vs Nalm6-LUC; Nalm6-E/R 24 h vs Nalm6-E/Rmut) were examined for expression in the RNA-seq data. For consistency, we focused on the 57 transcripts that were specifically altered in Nalm6-E/R 24 h vs Nalm6-LUC comparison. Expression analysis was only run on the regions selected based on GRO-seq.

**References for Supplemental Materials**

Eklund AC, Szallasi Z. 2008. Correction of technical bias in clinical microarray data improves concordance with known biological information. *Genome Biol*. **9**: R26.

Fine BM, Stanulla M, Schrappe M, Ho M, Viehmann S, Harbott J, Boxer LM. 2004. Gene expression patterns associated with recurrent chromosomal translocations in acute lymphoblastic leukemia. *Blood* **103**: 1043–1049.

Ford AM, Palmi C, Bueno C, Hong D, Cardus P, Knight D, Cazzaniga G, Enver T, Greaves M. 2009. The TEL-AML1 leukemia fusion gene dysregulates the TGF-beta pathway in early B lineage progenitor cells. *J Clin Invest* **119**: 826–36.

Goff L, Trapnell C. and Kelley D. 2013. cummeRbund: Analysis, exploration, manipulation, and visualization of Cufflinks high-throughput sequencing data. R package version 2.12.0.

Kim D, Pertea G, Trapnell C, Pimentel H, Kelley R, Salzberg SL. 2013. TopHat2: accurate alignment of transcriptomes in the presence of insertions, deletions and gene fusions. Genome Biology **14**: R36.

Langmead B, Trapnell C, Pop M, and Salzberg SL. 2009. Ultrafast and memory-efficient alignment of short DNA sequences to the human genome. *Genome Biol*. **10**: R25.

Ross M, Zhou X. 2003. Classification of pediatric acute lymphoblastic leukemia by gene expression profiling. *Blood* **102**: 2951–2959.

Storey JD. 2002. A direct approach to false discovery rates. *J. R. Stat. Soc. Ser. B Statistical Methodol*. **64**: 479–498.

Spitzer M, Wildenhain J, Rappsilber J, Tyers M. 2014. BoxPlotR: a web tool for generation of box plots. *Nat Methods* **11**: 121–2.

Trapnell C, Roberts A, Goff L, Pertea G, Kim D, Kelley DR., Pimentel H., Salzberg SL, Rinn JL, Pachter L. 2012. Differential gene and transcript expression analysis of RNA-seq experiments with TopHat and Cufflinks. *Nat. Protoc*. **7**: 562–578.

Trapnell C, Hendrickson DG, Sauvageau M, Goff L, Rinn JL, and Pachter L. 2013. Differential analysis of gene regulation at transcript resolution with RNA-seq. *Nature Biotechnology* **31**: 46-53.

Van Delft FW, Bellotti T, Luo Z, Jones LK, Patel N, Yiannikouris O, Hill AS, Hubank M, Kempski H, Fletcher D, et al. 2005. Prospective gene expression analysis accurately subtypes acute leukaemia in children and establishes a commonality between hyperdiploidy and t(12;21) in acute lymphoblastic leukaemia. *Br J Haematol* **130**: 26–35.

Yeoh E-J, Ross ME, Shurtleff S a, Williams WK, Patel D, Mahfouz R, Behm FG, Raimondi SC, Relling M V, Patel A, et al. 2002. Classification, subtype discovery, and prediction of outcome in pediatric acute lymphoblastic leukemia by gene expression profiling. *Cancer Cell* **1**: 133–143.

**References for GSE datasets used in microarray analysis**

Affer M, Dao S, Liu C, Olshen AB et al. 2011. Gene Expression Differences between
Enriched Normal and Chronic Myelogenous Leukemia Quiescent Stem/Progenitor Cells
and Correlations with Biological Abnormalities. *J Oncol* **2011**: 798592.

Andersson A, Edén P, Lindgren D, Nilsson J, Lassen C, Heldrup J, Fontes M, Borg A, Mitelman F, Johansson B, et al. 2005. Gene expression profiling of leukemic cell lines reveals conserved molecular signatures among subtypes with specific genetic aberrations. *Leukemia* **19**: 1042–50.

Andersson A, Ritz C, Lindgren D, Edén P, Lassen C, Heldrup J, Olofsson T, Råde J, Fontes M, Porwit-MacDonald A, et al. 2007. Microarray-based classification of a consecutive series of 121 childhood acute leukemias: prediction of leukemic and genetic subtype as well as of minimal residual disease status. *Leukemia* **21**: 1198–1203.

Basso K, Saito M, Sumazin P, Margolin AA et al. 2010. Integrated biochemical and computational approach identifies BCL6 direct target genes controlling multiple pathways in normal germinal center B cells. *Blood* **115(5):** 975-84.

Bhojwani D, Kang H, Menezes RX, Yang W et al. 2008. Gene expression signatures predictive of early response and outcome in high-risk childhood acute lymphoblastic leukemia: A Children's Oncology Group Study [corrected]. *J Clin Oncol* **26(27):** 4376-84.

Brune V, Tiacci E, Pfeil I, Döring C et al. 2008. Origin and pathogenesis of nodular lymphocyte-predominant Hodgkin lymphoma as revealed by global gene expression analysis. *J Exp Med* **205(10):** 2251-68.

Bungaro S, Dell'Orto MC, Zangrando A, Basso D et al. 2009. Integration of genomic and gene expression data of childhood ALL without known aberrations identifies subgroups with specific genetic hallmarks. *Genes Chromosomes Cancer* **48(1):** 22-38.

Campo Dell'Orto M, Zangrando A, Trentin L, Li R et al. 2007. New data on robustness of gene expression signatures in leukemia: comparison of three distinct total RNA preparation procedures. *BMC Genomics* **8**: 188.

Challa-Malladi M, Lieu YK, Califano O, Holmes AB et al. 2011. Combined genetic inactivation of β2-Microglobulin and CD58 reveals frequent escape from immune recognition in diffuse large B cell lymphoma. *Cancer Cell* **20(6):** 728-40.

Compagno M, Lim WK, Grunn A, Nandula SV et al. 2009. Mutations of multiple genes cause deregulation of NF-kappaB in diffuse large B-cell lymphoma. *Nature* **459(7247):** 717-21.

Den Boer ML, van Slegtenhorst M, De Menezes RX, Cheok MH et al. 2009. A subtype of childhood acute lymphoblastic leukaemia with poor treatment outcome: a genome-wide classification study. *Lancet Oncol* **10(2):** 125-34.

Fulci V, Colombo T, Chiaretti S, Messina M et al. 2009. Characterization of B- and T-lineage acute lymphoblastic leukemia by integrated analysis of MicroRNA and mRNA expression profiles. *Genes Chromosomes Cancer* **48(12)**: 1069-82.

Gandemer V, Rio A-G, de Tayrac M, Sibut V, Mottier S, Ly Sunnaram B, Henry C, Monnier A, Berthou C, Le Gall E, et al. 2007. Five distinct biological processes and 14 differentially expressed genes characterize TEL/AML1-positive leukemia. *BMC Genomics* **8**: 385.

Giefing M, Winoto-Morbach S, Sosna J, Döring C et al. 2013. Hodgkin-Reed-Sternberg cells in classical Hodgkin lymphoma show alterations of genes encoding the NADPH oxidase complex and impaired reactive oxygen species synthesis capacity. *PLoS One* **8(12):**e84928.

Haferlach T, Kohlmann A, Wieczorek L, Basso G et al. 2010. Clinical utility of microarray-based gene expression profiling in the diagnosis and subclassification of leukemia: report from the International Microarray Innovations in Leukemia Study Group. *J Clin Oncol* **28(15):** 2529-37.

Harvey RC, Mullighan CG, Wang X, Dobbin KK et al. 2010. Identification of novel cluster groups in pediatric high-risk B-precursor acute lymphoblastic leukemia with gene expression profiling: correlation with genome-wide DNA copy number alterations, clinical characteristics, and outcome. *Blood* **116(23):** 4874-84.

Hertzberg L, Vendramini E, Ganmore I, Cazzaniga G et al. 2010. Down syndrome acute lymphoblastic leukemia, a highly heterogeneous disease in which aberrant expression of CRLF2 is associated with mutated JAK2: a report from the International BFM Study Group. *Blood* **115(5):** 1006-17.

Isnardi I, Ng YS, Srdanovic I, Motaghedi R et al. 2008. IRAK-4- and MyD88-dependent pathways are essential for the removal of developing autoreactive B cells in humans. *Immunity* **29(5):** 746-57.

Kandilci A, Grosveld GC. 2009. Reintroduction of CEBPA in MN1-overexpressing hematopoietic cells prevents their hyperproliferation and restores myeloid differentiation. *Blood* **114(8):** 1596-606.

Kang H, Chen IM, Wilson CS, Bedrick EJ et al. 2010. Gene expression classifiers for relapse-free survival and minimal residual disease improve risk classification and outcome prediction in pediatric B-precursor acute lymphoblastic leukemia. *Blood* **115(7):** 1394-405.

Kohlmann A, Kipps TJ, Rassenti LZ, Downing JR et al. 2008. An international standardization programme towards the application of gene expression profiling in routine leukaemia diagnostics: the Microarray Innovations in LEukemia study prephase. *Br J Haematol* **142(5):** 802-7.

Krejci O, Wunderlich M, Geiger H, Chou FS et al. 2008. p53 signaling in response to increased DNA damage sensitizes AML1-ETO cells to stress-induced death. *Blood* **111(4):** 2190-9.

Kühnl A, Gökbuget N, Stroux A, Burmeister T et al. 2010. High BAALC expression predicts chemoresistance in adult B-precursor acute lymphoblastic leukemia. *Blood* **115(18):** 3737-44. Longo NS, Lugar PL, Yavuz S, Zhang W et al. 2009. Analysis of somatic hypermutation in X-linked hyper-IgM syndrome shows specific deficiencies in mutational targeting. *Blood* **113(16):** 3706-15.

Majeti R, Becker MW, Tian Q, Lee TL et al. 2009. Dysregulated gene expression networks in human acute myelogenous leukemia stem cells. *Proc Natl Acad Sci USA* **106(9):** 3396-401.

Mandelbaum J, Bhagat G, Tang H, Mo T et al. 2010. BLIMP1 is a tumor suppressor gene frequently disrupted in activated B cell-like diffuse large B cell lymphoma. *Cancer Cell* **18(6):** 568-79.

Meyer LH, Eckhoff SM, Queudeville M, Kraus JM et al. 2011. Early relapse in ALL is identified by time to leukemia in NOD/SCID mice and is characterized by a gene signature involving survival pathways. *Cancer Cell* **19(2):** 206-17.

Pasqualucci L, Dominguez-Sola D, Chiarenza A, Fabbri G et al. 2011. Inactivating mutations of acetyltransferase genes in B-cell lymphoma. *Nature* **471(7337)**: 189-95.

Payton JE, Grieselhuber NR, Chang LW, Murakami M et al. 2009. High throughput digital quantification of mRNA abundance in primary human acute myeloid leukemia samples. *J Clin Invest* **119(6):** 1714-26.

Rakhmanov M, Keller B, Gutenberger S, Foerster C et al. 2009. Circulating CD21low B cells in common variable immunodeficiency resemble tissue homing, innate-like B cells. *Proc Natl Acad Sci USA* **106(32):** 13451-6.

Schmidt S, Rainer J, Riml S, Ploner C et al. 2006. Identification of glucocorticoid-response genes in children with acute lymphoblastic leukemia. *Blood* **107(5):** 2061-9.

Staal FJ, de Ridder D, Szczepanski T, Schonewille T et al. 2010. Genome-wide expression analysis of paired diagnosis-relapse samples in ALL indicates involvement of pathways related to DNA replication, cell cycle and DNA repair, independent of immune phenotype. *Leukemia* **24(3)**: 491-9.

Stam RW, Schneider P, Hagelstein JA, van der Linden MH et al. 2010. Gene expression profiling-based dissection of MLL translocated and MLL germline acute lymphoblastic leukemia in infants. *Blood* **115(14):** 2835-44.

Stumpel DJ, Schneider P, Seslija L, Osaki H et al. 2012. Connectivity mapping identifies HDAC inhibitors for the treatment of t(4;11)-positive infant acute lymphoblastic leukemia. *Leukemia* **4**:682-92.

Stumpel DJ, Schotte D, Lange-Turenhout EA, Schneider P et al. 2011. Hypermethylation of specific microRNA genes in MLL-rearranged infant acute lymphoblastic leukemia: major matters at a micro scale. *Leukemia* **3:** 429-39.

Zangrando A, Dell'orto MC, Te Kronnie G, Basso G. 2009. MLL rearrangements in pediatric acute lymphoblastic and myeloblastic leukemias: MLL specific and lineage specific signatures. *BMC Med Genomics* **2**: 36.
