# Supplementary material for: Genome-wide repression of eRNA and target gene loci by the ETV6-RUNX1 fusion in acute leukemia
Source: HighWire-hosted journal article supplement (doi:10.1101/gr.193649.115), 2016-09-12
Supplement: Supplemental_Table_S1.docx [file Supplemental_Table_S1.docx]

**Table S1.** A set of GRO-seq detected E/R-regulated genes of which mRNA expression level was measured with RT-qPCR. Log2 fold change values of *ETV6-RUNX1* induction (Nalm6-E/R) or knockdown (REH-shE/R) samples in comparison to corresponding luciferase control samples (Nalm6-LUC or REH-shLUC) are shown for each of the independent experiment performed.

| **Gene Symbol** | **GRO-seq log2FC:**  **Nalm6-E/R 24h** | **RT-qPCR log2FC:**  **Nalm6-E/R 24h** | **RT-qPCR log2FC:**  **REH-shE/R** |
| --- | --- | --- | --- |
| **Downregulation** | | | |
| LAT2 | -1.691 | -1.768, -1.263, -1,14 | 2.418, 2.406, 2.096 |
| ITGA4 | -0.567 | -1.703, -1.236, -0.193 | 1.203, 1.706 |
| IGLL1 | -1.039 | -0.43, -1.265, -0.353 | 0.59, 1.59 |
| LAIR1 | -0.649 | -0.095, -0.55 | 0.315, 0.393 |
| LOC728175 | -1.020 | -0.625, -1.038 | 2.403, 0.178, 1.64 |
| CLEC14A | -0.637 | -0.276, -0.383 |  |
| FPGS | -0.577 | -0,865, -0.933 |  |
| SOCS2 | -0.746 | -0.226, -1,358 |  |
| RASD1 | -1.481 | -1.301, -2.651 |  |
| RMND5B | -1.164 | -0.783, -0.743 |  |
| ID3 | -0.707 | -0.665, -0.41 |  |
| PALD1 | -0.640 | -1.395, -0.74 |  |
| RASGRP2 | -1.649 | -1.651, -1.69 |  |
| **Upregulation** | | | |
| PHLDA1 | 1.785 | 2.178, 0.706 |  |
| KCNQ1OT1 | 0.653 | 0.416, 0.946, 0.456 |  |
| PRKY | 1.233 | 1.395, 0.96 |  |
| SGK223 | 0.570 | 0.14, 0.813 |  |
| ATF5 | 0.599 | 1.701, 1.57 |  |
| GPSM1  denovo at LOC100294145 | 0.894  2.67 | 0.163, 0.023  3.08, 3.23 |  |
