# Supplementary material for: Genome-wide repression of eRNA and target gene loci by the ETV6-RUNX1 fusion in acute leukemia
Source: HighWire-hosted journal article supplement (doi:10.1101/gr.193649.115), 2016-09-12
Supplement: Supplemental_Table_S2.xlsx [file Supplemental_Table_S2.xlsx]

## Sheet: Table S2. Transcript-centric
Table S2. Significantly regulated enhancers associated with E/R-regulated gene loci.
								ChIP-peaks			Enhancer area prediction				TF motifs, denovo ("best guess") detection at enhancer areas					TF motifs at the ChIP-peak		RUNX1-ChIP-peak and RUNX1-motif								RUNX1-ChIP-peak and ETS-motif
top 5 enhancers	Chr	start	end	enhancer code	score (euclidian distance)	direction after E/R expression	symbol of the transcript	GSE45144 RUNX1_peaks	GSE42075 SEM Runx1-peaks (top1000)	GSE17954 ETS-RUNX1 motif ETS.RUN.ETS.Runt..Jurkat.RUNX1.ChIP	Superenhancer region in CD34 (Nalm6_24h_enhancers_in_CD34_SE)	Superenhancer region in CD19 (Nalm6_24h_enhancers_in_CD19_CD20_SE)	Enhancer region in CD34 (Nalm6_24h_enhancers_in_CD34_K27ac)	Enhancer region in CD19 (Nalm6_24h_enhancers_in_CD19_CD20_K27ac)	5.BHTGTGGTTW.BestGuess.RUNX1.Runt..Jurkat.RUNX1.ChIP.Seq.GSE29180..Homer.0.975.	1.NAAACCACAR.BestGuess.RUNX1.Runt..Jurkat.RUNX1.ChIP.Seq.GSE29180..Homer.0.989.	24h_from_TAdown_m8.12_8.CAAGCCTGTGGG.BestGuess.MA0002.2_RUNX1.Jaspar.0.701.	24h_from_TAup_m8.12_4.ACCACAGTTTCACAT.BestGuess.RUNX.Runt..HPC7.Runx1.ChIP.Seq.GSE22178..Homer.0.616.	1.ACCGGAAGYD.BestGuess.Elk1.ETS..Hela.Elk1.ChIP.Seq.GSE31477..Homer.0.976. (ETS motif)	GSE45144_RUNX1_peaks.bed.withMotif	GSE42075_SEM_Runx1_peaks.bed.withMotif	Is there a RUNX1-peak at the enhancer?	GSE45144 RUNX1-peak AND either motif at the peak or denovo-detected motif at the enhancer	GSE42075 RUNX1-peak AND either motif at the peak or denovo-detected motif at the enhancer	RUNX1-ChIP-peak (GSE45144 or GSE42075) with RUNX1-motif	RUNX1-binding motif detected, (no requirements for RUNX1-chip-status)	Either RUNX1-ChIP peak or RUNX1- motif	RUNX1-ChIP-peak detected at both ChIP-experiments (GSE45144 and GSE42075)	E/R-regulated transcripts with associated enhancer with RUNX1-peak or RUNX1-motif	Is there an ETS-binding motif at the RUNX1-peak-containing enhancer?	ETS-binding motif detected (no requirements for RUNX1-chip-status)	Overlap of RUNX1 and ETS motifs at the enhancers (no requirements for RUNX1-chip-status)	Only ETS-motif (no RUNX1-motif) at the enhancer (no requirements for RUNX1-chip-status):
1	Chr21	46542593	46543093	intragenic_1847	1.46219	down	ADARB1	0	1	0	0	0	0	1	2	1	0	0	0	0	1	1	1	1	1	1	1	0	1	0	0	0	0
2	Chr21	46372462	46372962	intragenic_4519	1.38995	down	ADARB1	0	1	0	0	0	0	0	0	1	0	0	0	0	1	1	0	1	1	1	1	0		0	0	0	0
3	Chr21	46530832	46531332	intragenic_3696	1.8743	down	ADARB1	0	0	0	0	0	0	1	0	0	0	0	0	0	0	0	0	0	0	0	0	0		0	0	0	0
4	Chr21	46543372	46543872	intragenic_4843	1.86022	down	ADARB1	0	0	0	0	0	0	1	1	1	0	0	0	0	0	0	1	1	1	1	1	0		0	0	0	0
5	Chr21	46375766	46376266	intragenic_5938	1.61335	down	ADARB1	0	0	0	0	0	0	0	1	1	0	0	0	0	0	0	1	1	1	1	1	0		0	0	0	0
1	Chr22	24602318	24602818	bidirectional_3590	4.4075	down	ADORA2A	0	1	0	0	0	1	0	0	0	0	0	0	0	0	1	0	0	0	0	1	0	1	0	0	0	0
2	Chr22	24819671	24820171	intragenic_13569	1.62979	down	ADORA2A	0	0	0	0	1	0	1	0	0	0	0	0	0	0	0	0	0	0	0	0	0		0	0	0	0
3	Chr22	24823675	24824175	intragenic_3996	1.39771	down	ADORA2A	1	1	1	0	1	0	1	0	0	0	0	0	0	0	1	0	0	0	0	1	1		0	0	0	0
4	Chr22	24839367	24839867	intragenic_9376	1.1205	down	ADORA2A	0	0	0	0	0	0	0	0	0	0	0	0	0	0	0	0	0	0	0	0	0		0	0	0	0
5	Chr22	24603912	24604412	unidirectional_9289	3.92092	down	ADORA2A	0	1	0	0	0	1	0	0	0	0	0	2	0	0	1	0	0	0	0	1	0		1	1	0	1
1	Chr22	29811022	29811522	bidirectional_815	2.06983	up	AP1B1	0	1	0	0	0	0	1	0	0	0	0	0	0	0	1	0	0	0	0	1	0	1	0	0	0	0
2	Chr22	29781759	29782259	intragenic_3813	0.912457	up	AP1B1	0	1	0	0	1	1	1	0	0	0	0	2	0	0	1	0	0	0	0	1	0		1	1	0	1
3	Chr22	30165675	30166175	intragenic_5306	1.59104	up	AP1B1	0	0	0	0	0	0	0	0	0	0	0	1	0	0	0	0	0	0	0	0	0		0	1	0	1
4	Chr22	29815194	29815694	unidirectional_1594	0.990193	up	AP1B1	0	0	0	0	0	1	1	0	0	0	0	0	0	0	0	0	0	0	0	0	0		0	0	0	0
5	Chr22	29819123	29819623	unidirectional_2467	1.20379	up	AP1B1	1	0	0	0	0	1	0	0	0	0	0	0	0	0	1	0	0	0	0	1	0		0	0	0	0
1	Chr12	12941573	12942073	intragenic_10042	2.03922	down	APOLD1	0	0	0	0	0	0	0	0	0	0	0	0	0	0	0	0	0	0	0	0	0	1	0	0	0	0
2	Chr12	12888133	12888633	intragenic_10994	2.79769	down	APOLD1	0	1	0	1	1	1	1	0	2	0	0	0	0	1	1	1	1	1	1	1	0		0	0	0	0
3	Chr12	13254061	13254561	intragenic_1148	1.33246	down	APOLD1	1	1	0	1	1	1	1	0	0	0	0	1	0	0	1	0	0	0	0	1	1		1	1	0	1
4	Chr12	13192530	13193030	intragenic_13074	1.13282	down	APOLD1	0	0	0	0	0	0	0	0	0	0	0	2	0	0	0	0	0	0	0	0	0		1	1	0	1
5	Chr12	12889614	12890114	intragenic_5343	1.11641	down	APOLD1	0	1	0	1	1	1	1	1	1	0	0	0	0	1	1	1	1	1	1	1	0		0	0	0	0
1	ChrX	153064166	153064666	intragenic_1191	0.993967	down	ARHGAP4	0	0	0	0	0	0	0	0	0	0	0	2	0	0	0	0	0	0	0	0	0	1	1	1	0	1
2	ChrX	153250840	153251340	intragenic_13945	1.05119	down	ARHGAP4	0	1	0	0	0	1	1	0	0	0	0	1	0	0	1	0	0	0	0	1	0		1	1	0	1
3	ChrX	153247195	153247695	intragenic_3217	1.53158	down	ARHGAP4	0	1	0	0	0	0	1	2	2	0	0	0	0	1	1	1	1	1	1	1	0		0	0	0	0
4	ChrX	153389286	153389786	unidirectional_5684	1.5963	down	ARHGAP4	1	1	0	0	0	0	0	1	1	0	0	2	0	1	1	1	1	1	1	1	1		1	1	1	0
5	ChrX	153251010	153251510	unidirectional_707	0.663504	down	ARHGAP4	0	1	0	0	0	1	1	0	0	0	0	0	0	0	1	0	0	0	0	1	0		0	0	0	0
1	Chr19	50221921	50222421	bidirectional_917	2.35755	up	ATF5	0	0	0	0	0	1	0	1	1	0	0	1	0	0	0	1	1	1	1	1	0	1	0	1	1	0
2	Chr19	50427565	50428065	intragenic_2435	2.11777	up	ATF5	0	0	0	0	0	1	0	1	0	1	0	0	0	0	0	1	1	1	1	1	0		0	0	0	0
3	Chr19	50145770	50146270	intragenic_6388	1.68997	up	ATF5	0	0	0	0	0	1	1	0	0	0	0	0	0	0	0	0	0	0	0	0	0		0	0	0	0
4	Chr19	50426565	50427065	intragenic_8561	1.33019	up	ATF5	0	0	0	0	0	1	0	0	1	0	1	1	0	0	0	1	1	1	1	1	0		0	1	1	0
5	Chr19	50640243	50640743	unidirectional_3526	1.90149	up	ATF5	0	0	0	0	0	0	0	0	0	0	0	1	0	0	0	0	0	0	0	0	0		0	1	0	1
1	Chr12	14410528	14411028	bidirectional_2398	1.46379	up	ATF7IP	1	1	0	0	1	1	1	0	1	0	0	0	0	1	1	1	1	1	1	1	1	1	0	0	0	0
2	Chr12	14547232	14547732	intragenic_10197	2.41033	up	ATF7IP	0	0	0	0	1	1	1	1	2	0	0	0	0	0	0	1	1	1	1	1	0		0	0	0	0
3	Chr12	14518699	14519199	intragenic_4248	1.44827	up	ATF7IP	0	1	0	1	1	1	1	1	1	0	0	1	0	0	1	1	1	1	1	1	0		1	1	1	0
4	Chr12	14310075	14310575	unidirectional_5473	2.34607	up	ATF7IP	0	1	0	0	0	0	1	0	0	0	0	2	0	0	1	0	0	0	0	1	0		1	1	0	1
1	Chr3	182508175	182508675	bidirectional_5056	4.59191	up	ATP11B	0	0	0	0	0	0	0	0	0	0	0	2	0	0	0	0	0	0	0	0	0	1	1	1	0	1
2	Chr3	182816535	182817035	intragenic_10842	2.82347	up	ATP11B	1	0	0	0	0	0	0	0	0	0	0	1	0	0	1	0	0	0	0	1	0		1	1	0	1
3	Chr3	182507145	182507645	unidirectional_3253	1.78786	up	ATP11B	1	0	0	0	0	0	0	1	0	0	0	3	1	0	1	1	0	1	1	1	0		1	1	1	0
1	Chr1	17336204	17336704	intragenic_10638	4.17165	down	ATP13A2	0	1	0	0	0	0	0	0	0	0	0	1	0	0	1	0	0	0	0	1	0	1	1	1	0	1
2	Chr1	17221863	17222363	intragenic_13157	1.2402	down	ATP13A2	0	0	0	1	1	1	1	0	0	0	0	1	0	0	0	0	0	0	0	0	0		0	1	0	1
1	Chr17	79449809	79450309	bidirectional_428	0.999019	down	BAHCC1	1	0	0	0	0	0	1	0	0	1	0	1	0	0	1	1	0	1	1	1	0	1	1	1	1	0
2	Chr17	79451613	79452113	bidirectional_429	1.05259	down	BAHCC1	0	0	0	0	0	0	1	0	0	0	0	2	0	0	0	0	0	0	0	0	0		1	1	0	1
3	Chr17	79454813	79455313	bidirectional_476	1.02873	down	BAHCC1	0	0	0	0	0	1	1	0	0	0	0	0	0	0	0	0	0	0	0	0	0		0	0	0	0
4	Chr17	79375625	79376125	intragenic_1373	0.375887	down	BAHCC1	0	0	0	0	0	0	0	0	0	0	0	1	0	0	0	0	0	0	0	0	0		0	1	0	1
5	Chr17	79258687	79259187	intragenic_4477	0.409123	down	BAHCC1	0	0	0	0	0	1	1	0	0	0	0	0	0	0	0	0	0	0	0	0	0		0	0	0	0
1	Chr10	97884298	97884798	bidirectional_1025	0.979238	up	BLNK	0	0	0	0	0	1	0	0	0	0	0	0	0	0	0	0	0	0	0	0	0	1	0	0	0	0
2	Chr10	98054649	98055149	bidirectional_345	1.32993	up	BLNK	0	0	0	0	1	1	1	0	0	0	0	1	0	0	0	0	0	0	0	0	0		0	1	0	1
3	Chr10	98029606	98030106	intragenic_2749	0.797812	up	BLNK	0	0	0	0	1	0	1	0	0	0	0	0	0	0	0	0	0	0	0	0	0		0	0	0	0
4	Chr10	98346074	98346574	intragenic_3452	1.31374	up	BLNK	1	0	0	0	1	1	1	0	0	0	0	2	0	0	1	0	0	0	0	1	0		1	1	0	1
5	Chr10	98003074	98003574	intragenic_9	1.27494	up	BLNK	0	0	0	0	1	0	1	0	0	0	0	0	0	0	0	0	0	0	0	0	0		0	0	0	0
1	Chr10	22629373	22629873	bidirectional_643	1.12648	down	BMI1	0	1	0	0	0	1	1	0	0	0	0	1	0	0	1	0	0	0	0	1	0	1	1	1	0	1
2	Chr10	22518065	22518565	intragenic_13203	0.804971	down	BMI1	0	1	0	0	0	1	1	1	1	0	0	0	0	1	1	1	1	1	1	1	0		0	0	0	0
3	Chr10	22610447	22610947	intragenic_5077	0.602564	down	BMI1	0	0	0	0	0	1	1	0	0	0	0	0	0	0	0	0	0	0	0	0	0		0	0	0	0
4	Chr10	22605740	22606240	intragenic_7578	0.719999	down	BMI1	1	0	0	0	0	1	1	0	0	0	0	0	0	0	1	0	0	0	0	1	0		0	0	0	0
5	Chr10	22725711	22726211	intragenic_77	0.310601	down	BMI1	1	1	0	0	0	0	1	2	2	0	0	1	0	0	1	1	1	1	1	1	1		1	1	1	0
1	Chr2	10617475	10617975	bidirectional_1879	1.89253	down	C2orf48	0	1	0	0	0	0	0	0	0	0	0	1	0	0	1	0	0	0	0	1	0	1	1	1	0	1
2	Chr2	10633751	10634251	unidirectional_8674	1.31974	down	C2orf48	0	1	1	0	0	0	0	0	0	0	0	1	0	0	1	0	0	0	0	1	0		1	1	0	1
1	Chr5	179091717	179092217	intragenic_14092	1.06265	down	C5orf45	0	0	0	0	0	0	0	0	0	0	0	0	0	0	0	0	0	0	0	0	0	1	0	0	0	0
2	Chr5	179105325	179105825	intragenic_217	0.822975	down	C5orf45	0	1	0	0	0	1	1	0	0	0	0	1	0	0	1	0	0	0	0	1	0		1	1	0	1
3	Chr5	179496849	179497349	intragenic_3961	1.05247	down	C5orf45	1	1	0	0	0	1	1	2	2	0	0	0	1	1	1	1	1	1	1	1	1		0	0	0	0
4	Chr5	179104642	179105142	intragenic_4034	1.24433	down	C5orf45	0	0	0	0	0	1	1	0	0	0	0	1	0	0	0	0	0	0	0	0	0		0	1	0	1
5	Chr5	178978199	178978699	intragenic_4983	1.01334	down	C5orf45	0	1	0	0	0	0	1	0	0	0	0	0	0	0	1	0	0	0	0	1	0		0	0	0	0
1	Chr19	8570688	8571188	bidirectional_364	1.31823	up	CERS4	0	1	0	0	0	0	0	0	0	0	0	0	0	0	1	0	0	0	0	1	0	1	0	0	0	0
2	Chr19	7983006	7983506	intragenic_11553	1.3844	up	CERS4	0	0	0	0	0	0	0	1	1	0	0	0	0	0	0	1	1	1	1	1	0		0	0	0	0
3	Chr19	8274630	8275130	intragenic_5882	1.35825	up	CERS4	1	1	0	0	1	0	1	1	1	0	0	1	0	0	1	1	1	1	1	1	1		1	1	1	0
4	Chr19	7933546	7934046	intragenic_6993	1.27554	up	CERS4	0	1	0	0	0	0	1	2	2	0	0	0	0	1	1	1	1	1	1	1	0		0	0	0	0
5	Chr19	8225892	8226392	unidirectional_3936	1.18981	up	CERS4	0	0	0	0	0	0	0	1	1	0	0	0	0	0	0	1	1	1	1	1	0		0	0	0	0
1	Chr7	2143875	2144375	intragenic_1517	0.329591	down	CHST12	1	1	0	0	0	1	1	0	0	0	0	0	0	0	1	0	0	0	0	1	1	1	0	0	0	0
2	Chr7	2145503	2146003	intragenic_4037	0.522087	down	CHST12	0	0	0	0	0	0	1	0	0	0	0	0	0	0	0	0	0	0	0	0	0		0	0	0	0
3	Chr7	2292478	2292978	intragenic_7353	0.523686	down	CHST12	0	0	0	0	0	0	1	0	0	0	0	0	0	0	0	0	0	0	0	0	0		0	0	0	0
4	Chr7	2139100	2139600	intragenic_7561	0.61659	down	CHST12	0	1	0	0	0	0	1	0	0	0	0	2	0	0	1	0	0	0	0	1	0		1	1	0	1
5	Chr7	2077070	2077570	intragenic_8734	0.500029	down	CHST12	0	1	0	0	0	1	1	2	2	0	0	0	0	1	1	1	1	1	1	1	0		0	0	0	0
1	Chr14	38723303	38723803	intragenic_6434	0.756243	down	CLEC14A	0	0	0	0	0	0	0	0	0	0	0	2	0	0	0	0	0	0	0	0	0	0	1	1	0	1
1	Chr12	9546241	9546741	bidirectional_2037	1.21639	down	CLEC2D	0	0	0	0	0	0	0	0	0	0	0	0	0	0	0	0	0	0	0	0	0	1	0	0	0	0
2	Chr12	9803903	9804403	intragenic_5342	0.812882	down	CLEC2D	0	0	0	0	1	1	1	0	0	1	0	1	0	0	0	0	0	0	1	1	0		0	1	1	0
3	Chr12	9823505	9824005	intragenic_5480	1.25616	down	CLEC2D	0	0	0	0	1	0	1	0	0	0	0	0	0	0	0	0	0	0	0	0	0		0	0	0	0
4	Chr12	9599705	9600205	intragenic_6363	0.814559	down	CLEC2D	0	1	0	0	0	0	0	0	0	1	0	1	0	0	1	0	1	1	1	1	0		1	1	1	0
5	Chr12	10019170	10019670	intragenic_8097	0.815191	down	CLEC2D	0	0	0	1	0	1	1	0	0	0	0	1	0	0	0	0	0	0	0	0	0		0	1	0	1
1	Chr3	32408836	32409336	intragenic_10311	2.44608	down	CMTM7	0	0	0	0	0	0	0	0	0	0	0	0	0	0	0	0	0	0	0	0	0	1	0	0	0	0
2	Chr3	32611470	32611970	intragenic_1129	1.34838	down	CMTM7	0	1	0	0	0	1	0	0	0	0	0	1	0	0	1	0	0	0	0	1	0		1	1	0	1
3	Chr3	32434030	32434530	intragenic_12202	1.01209	down	CMTM7	0	0	0	0	1	0	1	0	0	0	0	0	0	0	0	0	0	0	0	0	0		0	0	0	0
4	Chr3	32324700	32325200	intragenic_2875	2.18626	down	CMTM7	0	1	0	0	0	0	0	1	1	0	0	0	0	0	1	1	1	1	1	1	0		0	0	0	0
5	Chr3	32443415	32443915	intragenic_6534	1.20487	down	CMTM7	0	1	0	0	1	1	1	0	0	0	0	0	0	0	1	0	0	0	0	1	0		0	0	0	0
1	Chr10	22629373	22629873	bidirectional_643	1.23246	down	COMMD3	0	1	0	0	0	1	1	0	0	0	0	1	0	0	1	0	0	0	0	1	0	1	1	1	0	1
2	Chr10	22518065	22518565	intragenic_13203	1.31621	down	COMMD3	0	1	0	0	0	1	1	1	1	0	0	0	0	1	1	1	1	1	1	1	0		0	0	0	0
3	Chr10	22605740	22606240	intragenic_7578	1.02917	down	COMMD3	1	0	0	0	0	1	1	0	0	0	0	0	0	0	1	0	0	0	0	1	0		0	0	0	0
4	Chr10	22725711	22726211	intragenic_77	0.61611	down	COMMD3	1	1	0	0	0	0	1	2	2	0	0	1	0	0	1	1	1	1	1	1	1		1	1	1	0
5	Chr10	22659199	22659699	intragenic_7781	5.24045	down	COMMD3	0	0	0	0	0	0	0	0	0	0	0	2	0	0	0	0	0	0	0	0	0		1	1	0	1
1	Chr10	22629373	22629873	bidirectional_643	1.11557	down	COMMD3-BMI1	0	1	0	0	0	1	1	0	0	0	0	1	0	0	1	0	0	0	0	1	0	1	1	1	0	1
2	Chr10	22518065	22518565	intragenic_13203	0.904916	down	COMMD3-BMI1	0	1	0	0	0	1	1	1	1	0	0	0	0	1	1	1	1	1	1	1	0		0	0	0	0
3	Chr10	22610447	22610947	intragenic_5077	0.62878	down	COMMD3-BMI1	0	0	0	0	0	1	1	0	0	0	0	0	0	0	0	0	0	0	0	0	0		0	0	0	0
4	Chr10	22605740	22606240	intragenic_7578	0.786602	down	COMMD3-BMI1	1	0	0	0	0	1	1	0	0	0	0	0	0	0	1	0	0	0	0	1	0		0	0	0	0
5	Chr10	22725711	22726211	intragenic_77	0.293887	down	COMMD3-BMI1	1	1	0	0	0	0	1	2	2	0	0	1	0	0	1	1	1	1	1	1	1		1	1	1	0
1	Chr16	89673602	89674102	bidirectional_1530	1.60586	down	CPNE7	0	1	0	0	0	0	0	1	1	0	0	0	0	1	1	1	1	1	1	1	0	1	0	0	0	0
2	Chr16	89310519	89311019	bidirectional_202	1.42515	down	CPNE7	0	0	0	0	0	0	0	0	0	0	0	0	0	0	0	0	0	0	0	0	0		0	0	0	0
3	Chr16	89753868	89754368	intragenic_12300	1.25117	down	CPNE7	0	0	0	0	0	0	0	0	0	0	0	1	0	0	0	0	0	0	0	0	0		0	1	0	1
4	Chr16	89772247	89772747	intragenic_5669	1.28139	down	CPNE7	0	0	0	0	0	0	0	0	0	0	0	1	0	0	0	0	0	0	0	0	0		0	1	0	1
5	Chr16	89984909	89985409	intragenic_7813	1.02366	down	CPNE7	0	0	0	0	0	0	0	1	1	0	0	0	0	0	0	1	1	1	1	1	0		0	0	0	0
1	Chr7	87103336	87103836	intragenic_10878	2.81637	up	CROT	0	0	0	0	0	0	1	2	2	0	0	0	0	0	0	1	1	1	1	1	0	1	0	0	0	0
2	Chr7	86845977	86846477	intragenic_5183	0.87638	up	CROT	0	1	0	0	1	1	1	1	1	0	0	1	0	0	1	1	1	1	1	1	0		1	1	1	0
3	Chr7	86782478	86782978	intragenic_7437	2.50176	up	CROT	0	0	0	0	0	1	1	1	1	0	0	0	0	0	0	1	1	1	1	1	0		0	0	0	0
1	Chr15	75074618	75075118	intragenic_4873	0.982231	down	CSK	0	1	0	1	1	1	1	0	0	0	0	1	0	0	1	0	0	0	0	1	0	1	1	1	0	1
2	Chr15	75229550	75230050	intragenic_5149	1.0384	down	CSK	0	0	0	0	0	0	0	0	1	0	0	2	0	0	0	0	0	0	1	1	0		1	1	1	0
3	Chr15	75162344	75162844	intragenic_7213	1.4813	down	CSK	1	1	0	0	0	1	1	0	0	0	0	3	0	0	1	0	0	0	0	1	1		1	1	0	1
4	Chr15	75397153	75397653	unidirectional_3039	0.594372	down	CSK	1	1	0	0	0	1	1	0	1	0	0	3	0	1	1	1	1	1	1	1	1		1	1	1	0
1	Chr10	32666955	32667455	bidirectional_1447	2.17944	down	EPC1	0	0	0	0	0	1	1	0	1	0	0	0	0	0	0	0	0	0	1	1	0	1	0	0	0	0
2	Chr10	32735625	32736125	intragenic_2694	2.14714	down	EPC1	1	0	0	0	0	0	0	0	0	0	0	1	0	0	1	0	0	0	0	1	0		1	1	0	1
3	Chr10	32344323	32344823	intragenic_5382	1.2946	down	EPC1	0	1	0	0	0	1	1	0	0	0	0	1	0	0	1	0	0	0	0	1	0		1	1	0	1
4	Chr10	32635301	32635801	intragenic_565	1.41337	down	EPC1	1	1	0	1	1	1	1	0	0	0	0	1	0	0	1	0	0	0	0	1	1		1	1	0	1
5	Chr10	32237759	32238259	unidirectional_8816	2.57462	down	EPC1	0	0	0	0	0	0	0	0	1	0	0	0	0	0	0	0	0	0	1	1	0		0	0	0	0
1	Chr19	17237085	17237585	intragenic_10078	1.85641	down	F2RL3	0	0	0	0	1	1	1	0	0	0	0	0	0	0	0	0	0	0	0	0	0	1	0	0	0	0
2	Chr19	17007871	17008371	intragenic_1968	1.06219	down	F2RL3	0	0	1	0	0	0	0	2	5	0	0	1	0	0	0	1	1	1	1	1	0		0	1	1	0
3	Chr19	16988349	16988849	intragenic_9365	1.45533	down	F2RL3	0	1	0	0	0	0	0	1	1	0	0	0	0	1	1	1	1	1	1	1	0		0	0	0	0
4	Chr19	17393349	17393849	intragenic_942	2.15444	down	F2RL3	0	0	0	0	0	0	0	0	0	0	0	0	0	0	0	0	0	0	0	0	0		0	0	0	0
1	Chr19	17237085	17237585	intragenic_10078	0.978099	down	FAM129C	0	0	0	0	1	1	1	0	0	0	0	0	0	0	0	0	0	0	0	0	0	1	0	0	0	0
2	Chr19	17638271	17638771	intragenic_6996	0.606255	down	FAM129C	0	0	0	0	0	0	1	0	0	1	0	0	0	0	0	0	0	0	1	1	0		0	0	0	0
3	Chr19	17417223	17417723	intragenic_8022	0.546346	down	FAM129C	0	0	0	0	0	0	0	0	0	0	0	0	0	0	0	0	0	0	0	0	0		0	0	0	0
4	Chr19	17716587	17717087	intragenic_851	0.661234	down	FAM129C	0	0	0	0	0	0	0	0	0	0	0	0	0	0	0	0	0	0	0	0	0		0	0	0	0
5	Chr19	17958260	17958760	intragenic_977	0.941831	down	FAM129C	1	0	0	0	0	0	1	0	0	0	0	0	0	0	1	0	0	0	0	1	0		0	0	0	0
1	Chr10	103574471	103574971	intragenic_10280	2.22741	up	FBXW4	0	1	0	0	0	0	1	1	1	0	0	1	0	1	1	1	1	1	1	1	0	1	1	1	1	0
1	Chr19	18134143	18134643	bidirectional_150	1.75458	down	FCHO1	0	0	0	0	1	1	1	0	0	0	0	0	0	0	0	0	0	0	0	0	0	1	0	0	0	0
2	Chr19	17637658	17638158	intragenic_2095	1.85277	down	FCHO1	0	1	0	0	0	0	1	1	1	0	0	0	0	1	1	1	1	1	1	1	0		0	0	0	0
3	Chr19	18209544	18210044	intragenic_2172	1.81361	down	FCHO1	0	1	0	0	1	0	1	0	0	0	0	1	0	0	1	0	0	0	0	1	0		1	1	0	1
4	Chr19	17638271	17638771	intragenic_6996	0.759836	down	FCHO1	0	0	0	0	0	0	1	0	0	1	0	0	0	0	0	0	0	0	1	1	0		0	0	0	0
5	Chr19	17716587	17717087	intragenic_851	1.05931	down	FCHO1	0	0	0	0	0	0	0	0	0	0	0	0	0	0	0	0	0	0	0	0	0		0	0	0	0
1	Chr19	17958260	17958760	intragenic_977	0.79526	down	FCHO1	1	0	0	0	0	0	1	0	0	0	0	0	0	0	1	0	0	0	0	1	0		0	0	0	0
2	Chr16	2525336	2525836	intragenic_3438	1.20226	down	FLJ42627	1	0	0	0	0	0	0	0	0	0	0	0	0	0	1	0	0	0	0	1	0	1	0	0	0	0
3	Chr16	2570728	2571228	intragenic_4683	0.800941	down	FLJ42627	0	0	0	0	1	0	1	0	0	0	0	1	0	0	0	0	0	0	0	0	0		0	1	0	1
4	Chr16	2955182	2955682	unidirectional_186	1.11535	down	FLJ42627	0	1	0	0	0	1	0	0	0	0	0	1	0	0	1	0	0	0	0	1	0		1	1	0	1
5	Chr16	3003704	3004204	unidirectional_579	1.11788	down	FLJ42627	0	1	0	0	0	0	0	0	0	0	0	1	0	0	1	0	0	0	0	1	0		1	1	0	1
1	Chr2	153108241	153108741	bidirectional_3972	2.10932	up	FMNL2	0	1	1	0	0	0	0	0	0	0	0	1	0	0	1	0	0	0	0	1	0	1	1	1	0	1
2	Chr2	153323356	153323856	intragenic_11622	2.66162	up	FMNL2	0	1	0	0	0	0	1	0	0	0	0	0	0	0	1	0	0	0	0	1	0		0	0	0	0
3	Chr2	153263689	153264189	intragenic_9680	2.71919	up	FMNL2	0	1	0	0	0	0	1	0	0	0	0	1	0	0	1	0	0	0	0	1	0		1	1	0	1
1	Chr9	132629015	132629515	intragenic_11084	1.24922	down	FNBP1	0	1	0	1	0	1	0	0	0	0	0	0	0	0	1	0	0	0	0	1	0	1	0	0	0	0
2	Chr9	132647889	132648389	intragenic_13940	1.07443	down	FNBP1	1	0	0	1	0	1	1	0	0	1	0	1	0	0	1	1	0	1	1	1	0		1	1	1	0
3	Chr9	132646623	132647123	intragenic_67	0.653002	down	FNBP1	0	0	0	1	0	1	1	1	1	0	0	2	0	0	0	1	1	1	1	1	0		1	1	1	0
4	Chr9	132625316	132625816	intragenic_6961	1.15916	down	FNBP1	1	1	0	1	0	1	0	0	0	1	0	2	0	0	1	1	1	1	1	1	1		1	1	1	0
5	Chr9	132807181	132807681	unidirectional_5118	1.45777	down	FNBP1	1	1	0	1	1	1	1	0	0	0	0	1	0	0	1	0	0	0	0	1	1		1	1	0	1
1	Chr9	130558955	130559455	intragenic_13278	1.18744	down	FPGS	1	1	0	0	0	1	1	1	1	0	0	0	1	0	1	1	1	1	1	1	1	1	0	0	0	0
2	Chr9	130627387	130627887	intragenic_1852	1.46691	down	FPGS	0	1	0	0	0	1	1	0	0	0	0	0	0	0	1	0	0	0	0	1	0		0	0	0	0
3	Chr9	130548547	130549047	intragenic_3855	0.834287	down	FPGS	0	0	0	0	0	0	1	0	0	0	0	1	0	0	0	0	0	0	0	0	0		0	1	0	1
4	Chr9	130615826	130616326	intragenic_7184	1.02316	down	FPGS	0	0	0	0	0	0	1	1	1	0	0	0	0	0	0	1	1	1	1	1	0		0	0	0	0
5	Chr9	130646346	130646846	intragenic_9008	1.03424	down	FPGS	1	1	0	0	0	1	0	0	0	0	0	0	0	0	1	0	0	0	0	1	1		0	0	0	0
1	Chr18	33047622	33048122	intragenic_1019	1.30784	up	GALNT1	0	1	0	0	0	0	0	0	0	0	0	1	0	0	1	0	0	0	0	1	0	1	1	1	0	1
2	Chr18	33163087	33163587	intragenic_13377	0.710328	up	GALNT1	0	0	0	0	0	0	1	0	1	0	0	0	0	0	0	0	0	0	1	1	0		0	0	0	0
3	Chr18	33044589	33045089	intragenic_14117	1.66062	up	GALNT1	0	0	0	0	0	1	0	0	0	0	0	1	0	0	0	0	0	0	0	0	0		0	1	0	1
4	Chr18	32923755	32924255	intragenic_3309	1.6594	up	GALNT1	1	0	0	0	0	0	1	0	0	0	0	1	0	0	1	0	0	0	0	1	0		1	1	0	1
5	Chr18	33042954	33043454	unidirectional_5979	1.40907	up	GALNT1	1	0	0	0	0	1	0	0	0	0	0	1	0	0	1	0	0	0	0	1	0		1	1	0	1
1	Chr3	82005055	82005555	bidirectional_3792	2.32704	up	GBE1	0	0	0	0	0	0	0	0	0	0	0	0	0	0	0	0	0	0	0	0	0	1	0	0	0	0
2	Chr3	82023296	82023796	bidirectional_3976	2.62325	up	GBE1	0	0	0	0	0	0	0	0	0	0	0	0	0	0	0	0	0	0	0	0	0		0	0	0	0
3	Chr3	81810157	81810657	intragenic_314	1.21556	up	GBE1	1	1	0	0	0	0	0	1	1	0	0	1	0	0	1	1	1	1	1	1	1		1	1	1	0
4	Chr3	81842810	81843310	unidirectional_3067	3.24241	up	GBE1	0	0	0	0	0	0	0	0	0	0	0	0	0	0	0	0	0	0	0	0	0		0	0	0	0
5	Chr3	81866071	81866571	unidirectional_3249	2.57564	up	GBE1	0	0	0	0	0	0	0	2	2	1	0	1	0	0	0	1	1	1	1	1	0		0	1	1	0
1	ChrX	78514664	78515164	bidirectional_1755	2.79058	up	GPR174	1	1	0	0	0	1	1	1	1	0	0	0	1	1	1	1	1	1	1	1	1	1	0	0	0	0
2	ChrX	78394314	78394814	bidirectional_1875	2.60137	up	GPR174	1	1	0	1	1	1	1	0	0	0	0	2	0	0	1	0	0	0	0	1	1		1	1	0	1
3	ChrX	78514389	78514889	bidirectional_4466	2.50115	up	GPR174	1	1	0	0	0	1	1	1	1	0	0	0	1	1	1	1	1	1	1	1	1		0	0	0	0
4	ChrX	78401013	78401513	bidirectional_891	2.61077	up	GPR174	0	0	0	1	1	1	1	0	0	0	0	1	0	0	0	0	0	0	0	0	0		0	1	0	1
5	ChrX	78622039	78622539	intragenic_9654	1.83228	up	GPR174	0	0	0	0	0	1	0	0	0	0	0	0	0	0	0	0	0	0	0	0	0		0	0	0	0
1	Chr9	139150335	139150835	bidirectional_1674	1.24835	up	GPSM1	0	0	0	0	0	0	0	0	0	0	0	0	0	0	0	0	0	0	0	0	0	1	0	0	0	0
2	Chr9	139112096	139112596	intragenic_10026	1.47928	up	GPSM1	0	1	0	0	0	0	0	0	0	0	0	1	0	0	1	0	0	0	0	1	0		1	1	0	1
3	Chr9	139123791	139124291	intragenic_2627	1.49783	up	GPSM1	1	0	0	0	1	1	1	0	0	0	0	0	0	0	1	0	0	0	0	1	0		0	0	0	0
4	Chr9	139257538	139258038	intragenic_425	1.4043	up	GPSM1	0	1	0	0	0	0	0	0	0	0	0	1	0	0	1	0	0	0	0	1	0		1	1	0	1
5	Chr9	138882315	138882815	unidirectional_9156	1.40294	up	GPSM1	0	1	0	0	0	0	0	1	0	0	0	2	0	0	1	0	1	1	1	1	0		1	1	1	0
1	Chr17	18730520	18731020	bidirectional_5025	2.55258	up	GRAP	0	0	0	0	0	0	0	0	0	0	0	1	0	0	0	0	0	0	0	0	0	1	0	1	0	1
2	Chr17	19220419	19220919	intragenic_11340	2.03094	up	GRAP	0	0	0	0	0	0	0	0	0	0	0	2	0	0	0	0	0	0	0	0	0		1	1	0	1
3	Chr17	19014397	19014897	intragenic_14270	1.90927	up	GRAP	0	0	0	0	1	0	1	1	1	0	0	0	0	0	0	1	1	1	1	1	0		0	0	0	0
4	Chr17	19209435	19209935	intragenic_7307	4.74856	up	GRAP	1	1	0	0	0	0	1	2	2	0	0	1	1	1	1	1	1	1	1	1	1		1	1	1	0
1	Chr17	19366442	19366942	bidirectional_4302	3.67943	up	GRAPL	1	1	0	0	0	0	1	0	1	0	0	2	0	1	1	1	1	1	1	1	1	1	1	1	1	0
2	Chr17	18730520	18731020	bidirectional_5025	2.44258	up	GRAPL	0	0	0	0	0	0	0	0	0	0	0	1	0	0	0	0	0	0	0	0	0		0	1	0	1
3	Chr17	19220419	19220919	intragenic_11340	1.78313	up	GRAPL	0	0	0	0	0	0	0	0	0	0	0	2	0	0	0	0	0	0	0	0	0		1	1	0	1
4	Chr17	19014397	19014897	intragenic_14270	2.0799	up	GRAPL	0	0	0	0	1	0	1	1	1	0	0	0	0	0	0	1	1	1	1	1	0		0	0	0	0
5	Chr17	19209435	19209935	intragenic_7307	4.48795	up	GRAPL	1	1	0	0	0	0	1	2	2	0	0	1	1	1	1	1	1	1	1	1	1		1	1	1	0
1	Chr6	125751401	125751901	bidirectional_4651	2.88068	up	HDDC2	0	1	0	0	0	0	0	1	2	0	0	2	0	0	1	1	1	1	1	1	0	1	1	1	1	0
2	Chr6	125751856	125752356	bidirectional_4652	1.20588	up	HDDC2	0	0	0	0	0	0	0	1	1	0	0	0	0	0	0	1	1	1	1	1	0		0	0	0	0
3	Chr6	125667634	125668134	bidirectional_840	2.16837	up	HDDC2	0	0	0	0	0	0	1	0	0	0	0	0	0	0	0	0	0	0	0	0	0		0	0	0	0
4	Chr6	125667217	125667717	bidirectional_841	2.09055	up	HDDC2	0	1	0	0	0	0	1	0	0	0	0	3	0	0	1	0	0	0	0	1	0		1	1	0	1
5	Chr6	125622247	125622747	intragenic_3024	2.35103	up	HDDC2	1	0	0	0	0	1	0	0	0	0	0	0	0	0	1	0	0	0	0	1	0		0	0	0	0
1	Chr3	148963420	148963920	bidirectional_4159	3.16454	down	HLTF	0	1	0	0	0	0	1	1	1	0	0	1	0	0	1	1	1	1	1	1	0	1	1	1	1	0
2	Chr3	148803473	148803973	intragenic_10136	1.25365	down	HLTF	0	0	0	0	0	0	0	0	0	0	0	0	0	0	0	0	0	0	0	0	0		0	0	0	0
3	Chr3	148860346	148860846	intragenic_10840	1.52591	down	HLTF	0	1	0	0	0	0	1	1	1	0	0	1	0	1	1	1	1	1	1	1	0		1	1	1	0
4	Chr3	148709902	148710402	intragenic_7541	2.24285	down	HLTF	0	0	0	0	0	0	0	0	0	0	0	0	0	0	0	0	0	0	0	0	0		0	0	0	0
5	Chr3	148705258	148705758	unidirectional_607	1.3047	down	HLTF	0	0	0	0	0	0	0	0	0	0	0	1	0	0	0	0	0	0	0	0	0		0	1	0	1
1	Chr17	14508328	14508828	bidirectional_1732	3.29178	up	HS3ST3B1	1	1	0	0	0	1	1	1	1	0	0	2	0	1	1	1	1	1	1	1	1	1	1	1	1	0
2	Chr17	14350991	14351491	bidirectional_1912	3.17758	up	HS3ST3B1	0	1	0	0	0	0	0	0	0	0	0	0	0	0	1	0	0	0	0	1	0		0	0	0	0
3	Chr17	14331510	14332010	unidirectional_444	1.47491	up	HS3ST3B1	0	1	0	0	0	1	1	0	0	0	0	2	0	0	1	0	0	0	0	1	0		1	1	0	1
4	Chr17	14200799	14201299	unidirectional_943	2.75226	up	HS3ST3B1	1	1	0	0	0	0	0	0	0	0	0	2	0	0	1	0	0	0	0	1	1		1	1	0	1
5	Chr17	14462813	14463313	unidirectional_9659	2.30915	up	HS3ST3B1	0	1	0	0	0	0	0	0	0	0	0	0	0	0	1	0	0	0	0	1	0		0	0	0	0
1	Chr1	158982228	158982728	intragenic_1593	1.09483	up	IFI16	0	0	0	0	1	1	1	0	0	0	0	1	0	0	0	0	0	0	0	0	0	1	0	1	0	1
2	Chr1	159038004	159038504	intragenic_2481	0.928155	up	IFI16	1	1	0	0	1	1	1	0	0	0	0	3	0	0	1	0	0	0	0	1	1		1	1	0	1
3	Chr1	158985261	158985761	intragenic_4001	2.05065	up	IFI16	1	1	0	0	1	1	1	0	0	0	0	3	0	0	1	0	0	0	0	1	1		1	1	0	1
4	Chr1	158624339	158624839	intragenic_4171	1.17878	up	IFI16	0	1	0	0	0	1	0	1	1	0	0	1	0	0	1	1	1	1	1	1	0		1	1	1	0
5	Chr1	159037468	159037968	intragenic_8697	1.32383	up	IFI16	0	1	0	0	1	1	1	1	1	0	0	1	0	0	1	1	1	1	1	1	0		1	1	1	0
1	Chr22	23912870	23913370	intragenic_2105	0.678871	down	IGLL1	0	0	0	0	0	1	0	0	0	0	0	0	0	0	0	0	0	0	0	0	0	1	0	0	0	0
2	Chr22	23558654	23559154	intragenic_5104	0.894952	down	IGLL1	1	1	0	1	0	1	0	1	1	1	0	2	0	1	1	1	1	1	1	1	1		1	1	1	0
3	Chr22	23611723	23612223	intragenic_5105	0.472227	down	IGLL1	0	1	0	1	0	1	1	0	0	0	0	0	0	0	1	0	0	0	0	1	0		0	0	0	0
4	Chr22	23933138	23933638	unidirectional_7011	0.75856	down	IGLL1	0	0	0	0	0	1	0	0	0	0	0	0	0	0	0	0	0	0	0	0	0		0	0	0	0
1	Chr7	155157607	155158107	bidirectional_1533	0.715104	down	INSIG1	0	1	0	0	0	0	0	0	0	0	0	1	0	0	1	0	0	0	0	1	0	1	1	1	0	1
2	Chr7	155156236	155156736	bidirectional_1686	0.755131	down	INSIG1	0	1	0	0	0	0	0	1	1	0	0	0	0	1	1	1	1	1	1	1	0		0	0	0	0
3	Chr7	155158200	155158700	bidirectional_214	0.87952	down	INSIG1	0	1	0	0	0	0	0	2	2	1	0	1	0	0	1	1	1	1	1	1	0		1	1	1	0
4	Chr7	155162284	155162784	bidirectional_635	0.841549	down	INSIG1	0	0	0	0	0	0	0	2	2	0	0	2	0	0	0	1	1	1	1	1	0		1	1	1	0
5	Chr7	155159467	155159967	bidirectional_636	0.647392	down	INSIG1	0	0	0	0	0	0	0	0	0	0	0	0	0	0	0	0	0	0	0	0	0		0	0	0	0
1	Chr2	182325810	182326310	intragenic_11208	1.41527	down	ITGA4	0	0	0	1	1	1	1	0	0	0	0	1	0	0	0	0	0	0	0	0	0	1	0	1	0	1
2	Chr2	182165306	182165806	intragenic_13243	1.48106	down	ITGA4	1	1	0	1	0	1	0	1	2	1	0	1	0	1	1	1	1	1	1	1	1		1	1	1	0
3	Chr2	182171879	182172379	intragenic_13435	1.24221	down	ITGA4	0	0	0	1	1	1	1	0	0	0	0	0	0	0	0	0	0	0	0	0	0		0	0	0	0
4	Chr2	182322525	182323025	intragenic_321	0.808595	down	ITGA4	0	0	0	1	1	1	1	0	0	0	0	0	0	0	0	0	0	0	0	0	0		0	0	0	0
1	Chr10	103124572	103125072	intragenic_148	1.86186	down	KAZALD1	1	1	0	0	0	1	1	0	0	0	0	1	0	0	1	0	0	0	0	1	1	1	1	1	0	1
2	Chr10	102759218	102759718	intragenic_1952	1.09234	down	KAZALD1	0	0	0	0	0	1	1	0	0	0	0	0	0	0	0	0	0	0	0	0	0		0	0	0	0
3	Chr10	102672879	102673379	intragenic_2966	0.976239	down	KAZALD1	0	0	0	0	0	1	1	1	1	0	0	0	0	0	0	1	1	1	1	1	0		0	0	0	0
4	Chr10	102728955	102729455	unidirectional_4292	4.98923	down	KAZALD1	0	0	0	0	0	0	0	0	0	0	0	0	0	0	0	0	0	0	0	0	0		0	0	0	0
5	Chr10	102802370	102802870	unidirectional_624	0.897412	down	KAZALD1	1	1	0	0	0	1	1	0	0	0	0	2	0	0	1	0	0	0	0	1	1		1	1	0	1
1	Chr11	3077541	3078041	intragenic_10547	1.45939	up	KCNQ1OT1	0	1	0	0	0	0	0	0	0	0	0	2	0	0	1	0	0	0	0	1	0	1	1	1	0	1
2	Chr11	2421285	2421785	intragenic_14011	1.66029	up	KCNQ1OT1	1	1	0	0	0	1	1	0	0	0	0	8	0	0	1	0	0	0	0	1	1		1	1	0	1
3	Chr11	2902766	2903266	intragenic_14049	1.55913	up	KCNQ1OT1	0	0	0	0	0	0	0	2	2	0	0	0	0	0	0	1	1	1	1	1	0		0	0	0	0
4	Chr11	2847500	2848000	intragenic_2771	1.70429	up	KCNQ1OT1	1	1	0	0	0	1	0	0	0	0	0	0	0	0	1	0	0	0	0	1	1		0	0	0	0
5	Chr11	2834590	2835090	intragenic_5709	1.10364	up	KCNQ1OT1	0	1	0	0	0	0	0	0	0	0	0	0	0	0	1	0	0	0	0	1	0		0	0	0	0
1	Chr13	46861119	46861619	bidirectional_4602	2.64434	up	KIAA0226L	0	0	0	0	0	0	0	0	0	0	0	1	0	0	0	0	0	0	0	0	0	1	0	1	0	1
2	Chr13	46957588	46958088	intragenic_1809	1.29127	up	KIAA0226L	0	0	0	0	1	0	1	1	1	0	0	0	0	0	0	1	1	1	1	1	0		0	0	0	0
3	Chr13	46753676	46754176	intragenic_6250	3.36873	up	KIAA0226L	1	1	0	1	1	1	1	1	2	0	0	1	1	1	1	1	1	1	1	1	1		1	1	1	0
4	Chr13	46869497	46869997	unidirectional_4778	1.29647	up	KIAA0226L	0	0	0	0	0	1	0	0	0	1	0	1	0	0	0	0	0	0	1	1	0		0	1	1	0
5	Chr13	46869892	46870392	unidirectional_799	2.73753	up	KIAA0226L	1	1	0	0	0	1	0	1	1	0	0	0	0	1	1	1	1	1	1	1	1		0	0	0	0
1	Chr10	32667514	32668014	bidirectional_1446	1.46991	down	KIF5B	0	1	0	0	0	1	1	0	0	0	0	0	0	0	1	0	0	0	0	1	0	1	0	0	0	0
2	Chr10	31996140	31996640	bidirectional_1776	0.899396	down	KIF5B	0	0	0	0	0	1	1	0	0	1	0	0	0	0	0	0	0	0	1	1	0		0	0	0	0
3	Chr10	32039053	32039553	bidirectional_4799	1.05295	down	KIF5B	0	0	0	0	0	0	0	0	0	0	0	0	0	0	0	0	0	0	0	0	0		0	0	0	0
4	Chr10	32344323	32344823	intragenic_5382	0.866274	down	KIF5B	0	1	0	0	0	1	1	0	0	0	0	1	0	0	1	0	0	0	0	1	0		1	1	0	1
5	Chr10	32635301	32635801	intragenic_565	1.02299	down	KIF5B	1	1	0	1	1	1	1	0	0	0	0	1	0	0	1	0	0	0	0	1	1		1	1	0	1
1	Chr19	54900416	54900916	bidirectional_226	0.599495	down	LAIR1	0	0	0	0	0	0	1	1	1	0	0	0	0	0	0	1	1	1	1	1	0	1	0	0	0	0
2	Chr19	54857444	54857944	bidirectional_4490	0.851726	down	LAIR1	0	1	0	0	0	0	1	0	1	0	0	1	0	1	1	0	1	1	1	1	0		1	1	1	0
3	Chr19	54789286	54789786	intragenic_13168	0.8233	down	LAIR1	0	1	0	0	0	1	1	0	0	1	0	1	0	0	1	0	1	1	1	1	0		1	1	1	0
4	Chr19	55009560	55010060	intragenic_13478	0.64553	down	LAIR1	0	0	0	0	0	1	1	1	1	0	0	1	0	0	0	1	1	1	1	1	0		0	1	1	0
5	Chr19	54873302	54873802	intragenic_8128	0.787255	down	LAIR1	0	0	0	0	0	1	1	1	1	0	0	0	0	0	0	1	1	1	1	1	0		0	0	0	0
1	Chr19	54900416	54900916	bidirectional_226	0.622388	down	LAIR2	0	0	0	0	0	0	1	1	1	0	0	0	0	0	0	1	1	1	1	1	0	1	0	0	0	0
2	Chr19	54857444	54857944	bidirectional_4490	0.902123	down	LAIR2	0	1	0	0	0	0	1	0	1	0	0	1	0	1	1	0	1	1	1	1	0		1	1	1	0
3	Chr19	54789286	54789786	intragenic_13168	0.774475	down	LAIR2	0	1	0	0	0	1	1	0	0	1	0	1	0	0	1	0	1	1	1	1	0		1	1	1	0
4	Chr19	55009560	55010060	intragenic_13478	0.653612	down	LAIR2	0	0	0	0	0	1	1	1	1	0	0	1	0	0	0	1	1	1	1	1	0		0	1	1	0
5	Chr19	54873302	54873802	intragenic_8128	0.811331	down	LAIR2	0	0	0	0	0	1	1	1	1	0	0	0	0	0	0	1	1	1	1	1	0		0	0	0	0
1	Chr7	73625219	73625719	intragenic_1240	1.40683	down	LAT2	0	1	0	0	0	0	1	1	1	0	0	1	0	0	1	1	1	1	1	1	0	1	1	1	1	0
2	Chr7	73508951	73509451	intragenic_5651	1.99785	down	LAT2	0	0	0	0	0	1	1	0	0	1	0	2	0	0	0	0	0	0	1	1	0		1	1	1	0
3	Chr7	73656122	73656622	intragenic_6486	1.58823	down	LAT2	0	1	0	0	0	0	1	0	0	0	0	1	0	0	1	0	0	0	0	1	0		1	1	0	1
4	Chr7	73589079	73589579	intragenic_7683	1.58927	down	LAT2	0	0	0	0	0	0	1	0	0	0	0	0	0	0	0	0	0	0	0	0	0		0	0	0	0
5	Chr7	73747168	73747668	intragenic_9297	2.06404	down	LAT2	0	1	0	0	0	0	0	0	0	0	0	0	0	0	1	0	0	0	0	1	0		0	0	0	0
1	Chr9	140023997	140024497	bidirectional_108	1.12074	down	LCN10	0	0	0	0	0	1	1	0	0	0	0	0	0	0	0	0	0	0	0	0	0	1	0	0	0	0
2	Chr9	140023590	140024090	bidirectional_109	1.45118	down	LCN10	0	0	0	0	0	1	1	0	0	0	0	1	0	0	0	0	0	0	0	0	0		0	1	0	1
3	Chr9	139266842	139267342	intragenic_10536	1.01538	down	LCN10	0	1	0	0	0	0	0	0	0	0	0	0	0	0	1	0	0	0	0	1	0		0	0	0	0
4	Chr9	139539391	139539891	intragenic_13311	1.0638	down	LCN10	0	1	0	1	0	1	0	0	0	0	0	2	0	0	1	0	0	0	0	1	0		1	1	0	1
5	Chr9	139581301	139581801	intragenic_4359	1.1391	down	LCN10	1	0	0	0	0	0	0	0	0	0	0	1	0	0	1	0	0	0	0	1	0		1	1	0	1
1	Chr9	140023997	140024497	bidirectional_108	1.49669	down	LCN8	0	0	0	0	0	1	1	0	0	0	0	0	0	0	0	0	0	0	0	0	0	1	0	0	0	0
2	Chr9	139266842	139267342	intragenic_10536	1.62774	down	LCN8	0	1	0	0	0	0	0	0	0	0	0	0	0	0	1	0	0	0	0	1	0		0	0	0	0
3	Chr9	139844282	139844782	intragenic_13974	1.14044	down	LCN8	0	1	0	0	0	1	1	0	0	0	0	0	0	0	1	0	0	0	0	1	0		0	0	0	0
4	Chr9	139651844	139652344	intragenic_2272	1.23968	down	LCN8	0	1	0	0	0	0	0	1	1	0	0	2	0	1	1	1	1	1	1	1	0		1	1	1	0
5	Chr9	139887029	139887529	intragenic_3587	1.67009	down	LCN8	0	1	0	0	0	0	1	0	0	0	0	0	0	0	1	0	0	0	0	1	0		0	0	0	0
1	Chr6	32912051	32912551	bidirectional_1429	4.27785	up	denovo E/R15/LOC100294145/	1	1	0	1	1	1	1	0	0	0	0	1	0	0	1	0	0	0	0	1	1	1	1	1	0	1
2	Chr6	32865164	32865664	intragenic_12537	4.45892	up	denovo E/R15/LOC100294145/	0	0	0	0	0	0	1	2	2	0	0	1	0	0	0	1	1	1	1	1	0		0	1	1	0
3	Chr6	33150868	33151368	intragenic_5849	3.31105	up	denovo E/R15/LOC100294145/	0	0	2	0	0	0	0	0	0	0	0	7	0	0	0	0	0	0	0	0	0		1	1	0	1
4	Chr6	32571685	32572185	unidirectional_1039	3.07351	up	denovo E/R15/LOC100294145/	0	0	0	1	1	1	1	0	0	0	0	3	0	0	0	0	0	0	0	0	0		1	1	0	1
5	Chr6	32571037	32571537	unidirectional_8459	2.13853	up	denovo E/R15/LOC100294145/	0	0	0	0	1	1	1	0	0	0	0	1	0	0	0	0	0	0	0	0	0		0	1	0	1
1	Chr1	182749905	182750405	bidirectional_4154	2.18342	down	LOC284648	0	1	0	0	0	0	0	1	1	0	0	2	0	1	1	1	1	1	1	1	0	1	1	1	1	0
2	Chr1	182429547	182430047	intragenic_10116	2.28367	down	LOC284648	0	0	0	0	0	0	0	0	0	0	0	0	0	0	0	0	0	0	0	0	0		0	0	0	0
3	Chr1	182585136	182585636	intragenic_7950	0.808963	down	LOC284648	1	1	0	0	0	0	0	2	3	0	0	1	1	1	1	1	1	1	1	1	1		1	1	1	0
4	Chr1	182601536	182602036	unidirectional_1116	2.09038	down	LOC284648	0	1	1	0	0	0	1	1	1	0	0	2	0	0	1	1	1	1	1	1	0		1	1	1	0
5	Chr1	182931648	182932148	unidirectional_1610	2.89493	down	LOC284648	0	0	0	0	0	0	0	2	2	0	0	1	0	0	0	1	1	1	1	1	0		0	1	1	0
1	Chr4	185204282	185204782	bidirectional_4402	1.04019	down	LOC728175	0	1	0	0	0	0	1	0	0	0	0	0	0	0	1	0	0	0	0	1	0	1	0	0	0	0
2	Chr4	185327962	185328462	intragenic_10500	1.36917	down	LOC728175	0	0	0	0	1	1	1	0	0	0	0	0	0	0	0	0	0	0	0	0	0		0	0	0	0
3	Chr4	185654392	185654892	intragenic_2270	1.30719	down	LOC728175	0	1	0	0	0	0	0	2	2	0	0	1	0	1	1	1	1	1	1	1	0		1	1	1	0
4	Chr4	185268451	185268951	intragenic_2385	1.14034	down	LOC728175	1	1	0	0	1	1	1	0	0	0	0	0	0	0	1	0	0	0	0	1	1		0	0	0	0
5	Chr4	185313440	185313940	intragenic_878	0.9508	down	LOC728175	0	0	0	0	1	0	1	0	0	0	0	0	0	0	0	0	0	0	0	0	0		0	0	0	0
1	Chr21	47710346	47710846	intragenic_11959	1.76697	down	LSS	0	1	0	0	0	0	1	0	0	0	0	0	0	0	1	0	0	0	0	1	0	1	0	0	0	0
2	Chr21	47775029	47775529	intragenic_9934	2.41211	down	LSS	0	0	0	0	0	0	0	1	2	1	0	1	0	0	0	1	1	1	1	1	0		0	1	1	0
3	Chr21	47979421	47979921	intragenic_9935	5.48284	down	LSS	0	1	0	0	0	0	1	0	0	0	0	2	0	0	1	0	0	0	0	1	0		1	1	0	1
1	Chr10	27793354	27793854	intragenic_11488	1.28427	down	MASTL	0	0	0	0	0	0	0	0	0	0	0	0	0	0	0	0	0	0	0	0	0	1	0	0	0	0
2	Chr10	27529133	27529633	intragenic_3912	1.03639	down	MASTL	0	0	0	0	0	1	1	0	0	0	0	0	0	0	0	0	0	0	0	0	0		0	0	0	0
3	Chr10	27088286	27088786	intragenic_4320	1.10222	down	MASTL	0	1	0	0	1	0	1	0	0	0	0	0	0	0	1	0	0	0	0	1	0		0	0	0	0
4	Chr10	27044369	27044869	intragenic_5289	0.949105	down	MASTL	0	1	0	0	1	1	1	0	0	0	0	0	0	0	1	0	0	0	0	1	0		0	0	0	0
5	Chr10	27093953	27094453	intragenic_5967	0.553256	down	MASTL	0	1	0	0	1	0	1	1	1	0	0	0	0	1	1	1	1	1	1	1	0		0	0	0	0
1	Chr3	152313813	152314313	bidirectional_3087	2.65212	up	MBNL1	1	1	0	0	0	1	1	1	1	0	0	1	0	0	1	1	1	1	1	1	1	1	1	1	1	0
2	Chr3	151915091	151915591	bidirectional_4784	4.48556	up	MBNL1	0	0	0	1	1	1	1	1	0	0	0	0	0	0	0	0	0	0	1	1	0		0	0	0	0
3	Chr3	151917155	151917655	unidirectional_10298	2.43043	up	MBNL1	0	0	0	1	1	1	1	0	0	0	0	1	0	0	0	0	0	0	0	0	0		0	1	0	1
4	Chr3	151589390	151589890	unidirectional_8719	1.67907	up	MBNL1	1	1	1	0	0	1	1	0	0	0	0	3	0	0	1	0	0	0	0	1	1		1	1	0	1
5	Chr3	151923104	151923604	unidirectional_9738	3.11287	up	MBNL1	1	1	0	1	1	1	1	1	1	0	0	0	1	1	1	1	1	1	1	1	1		0	0	0	0
1	Chr6	109643985	109644485	bidirectional_2519	1.80972	down	MICAL1	0	1	0	0	0	0	0	3	2	0	0	2	0	1	1	1	1	1	1	1	0	1	1	1	1	0
2	Chr6	109644544	109645044	bidirectional_2971	1.46581	down	MICAL1	0	0	0	0	0	0	0	0	0	0	0	0	0	0	0	0	0	0	0	0	0		0	0	0	0
3	Chr6	109702729	109703229	intragenic_3261	0.190764	down	MICAL1	1	1	0	1	0	1	1	0	0	0	0	1	0	0	1	0	0	0	0	1	1		1	1	0	1
4	Chr6	109625482	109625982	intragenic_7680	0.439161	down	MICAL1	1	1	0	0	0	1	0	2	2	0	0	1	0	1	1	1	1	1	1	1	1		1	1	1	0
5	Chr6	109438431	109438931	intragenic_8076	3.07562	down	MICAL1	0	1	0	0	0	0	0	0	0	0	0	0	0	0	1	0	0	0	0	1	0		0	0	0	0
1	Chr10	21808776	21809276	intragenic_10538	3.50404	down	MLLT10	0	0	0	1	0	1	0	0	0	0	0	2	0	0	0	0	0	0	0	0	0	1	1	1	0	1
2	Chr10	21784552	21785052	intragenic_1994	1.17829	down	MLLT10	1	1	0	0	0	1	0	0	1	0	0	1	0	1	1	1	1	1	1	1	1		1	1	1	0
3	Chr10	21813283	21813783	intragenic_3938	1.51827	down	MLLT10	0	0	0	1	0	1	0	0	0	0	0	0	0	0	0	0	0	0	0	0	0		0	0	0	0
4	Chr10	21805619	21806119	intragenic_9729	1.65608	down	MLLT10	0	1	0	0	0	0	0	0	0	0	0	1	0	0	1	0	0	0	0	1	0		1	1	0	1
5	Chr10	22039220	22039720	unidirectional_8516	1.59734	down	MLLT10	0	0	0	0	0	0	0	0	0	0	0	0	0	0	0	0	0	0	0	0	0		0	0	0	0
1	Chr10	30504501	30505001	bidirectional_1119	2.12962	down	MTPAP	0	1	0	0	0	0	0	0	0	0	0	3	0	0	1	0	0	0	0	1	0	1	1	1	0	1
2	Chr10	30509000	30509500	bidirectional_339	1.39854	down	MTPAP	0	1	0	0	0	1	0	0	0	0	0	1	0	0	1	0	0	0	0	1	0		1	1	0	1
3	Chr10	30995688	30996188	intragenic_13517	1.29519	down	MTPAP	0	0	0	0	0	0	1	0	1	0	0	0	0	0	0	0	0	0	1	1	0		0	0	0	0
4	Chr10	30316239	30316739	intragenic_5779	2.21974	down	MTPAP	1	1	2	0	0	0	0	0	0	1	0	1	0	0	1	1	1	1	1	1	1		1	1	1	0
5	Chr10	30475503	30476003	unidirectional_3912	1.51035	down	MTPAP	0	0	0	0	0	0	0	0	0	0	0	1	0	0	0	0	0	0	0	0	0		0	1	0	1
1	Chr22	26138887	26139387	intragenic_7645	1.06887	down	MYO18B	0	0	0	0	0	0	0	0	1	1	0	0	0	0	0	1	1	1	1	1	0	1	0	0	0	0
2	Chr22	25799474	25799974	unidirectional_1294	0.443968	down	MYO18B	0	1	0	0	0	1	1	1	2	0	0	1	0	1	1	1	1	1	1	1	0		1	1	1	0
3	Chr22	26132673	26133173	unidirectional_1801	1.49162	down	MYO18B	1	1	0	0	0	0	0	1	1	0	0	2	1	1	1	1	1	1	1	1	1		1	1	1	0
4	Chr22	25798122	25798622	unidirectional_4101	1.62505	down	MYO18B	0	0	0	0	0	1	1	0	0	0	0	1	0	0	0	0	0	0	0	0	0		0	1	0	1
5	Chr22	25801260	25801760	unidirectional_489	1.5368	down	MYO18B	0	0	0	0	0	1	1	0	0	0	0	2	0	0	0	0	0	0	0	0	0		1	1	0	1
1	Chr5	177473687	177474187	intragenic_2130	2.08657	down	N4BP3	0	0	0	0	0	0	0	0	0	0	0	1	0	0	0	0	0	0	0	0	0	1	0	1	0	1
2	Chr5	177869313	177869813	intragenic_3960	1.47494	down	N4BP3	0	0	0	0	0	1	0	0	0	0	0	1	0	0	0	0	0	0	0	0	0		0	1	0	1
3	Chr5	177545133	177545633	intragenic_4236	0.515138	down	N4BP3	1	1	0	0	0	0	1	0	0	0	0	2	0	0	1	0	0	0	0	1	1		1	1	0	1
4	Chr5	177548450	177548950	intragenic_5370	0.457281	down	N4BP3	0	0	0	0	0	0	0	0	0	0	0	2	0	0	0	0	0	0	0	0	0		1	1	0	1
5	Chr5	177558345	177558845	intragenic_7096	1.31592	down	N4BP3	0	0	0	0	0	0	0	1	1	0	0	0	0	0	0	1	1	1	1	1	0		0	0	0	0
1	Chr5	36394670	36395170	bidirectional_2338	0.848771	up	NADK2	0	0	0	0	0	0	0	0	0	0	0	0	0	0	0	0	0	0	0	0	0	1	0	0	0	0
2	Chr5	36396043	36396543	bidirectional_2685	0.875981	up	NADK2	0	1	0	0	0	0	0	0	0	0	0	1	0	0	1	0	0	0	0	1	0		1	1	0	1
3	Chr5	36054797	36055297	intragenic_1212	1.57474	up	NADK2	0	1	0	0	0	0	0	2	2	0	0	1	0	1	1	1	1	1	1	1	0		1	1	1	0
4	Chr5	35908586	35909086	intragenic_1249	1.07815	up	NADK2	1	1	0	0	0	1	0	0	1	0	0	1	0	1	1	1	1	1	1	1	1		1	1	1	0
5	Chr5	35884807	35885307	intragenic_13384	1.17512	up	NADK2	0	1	0	0	0	1	0	1	0	0	0	0	0	1	1	0	1	1	1	1	0		0	0	0	0
1	Chr1	201278479	201278979	intragenic_11014	1.07772	down	NAV1	0	0	0	0	0	0	0	0	0	0	0	1	0	0	0	0	0	0	0	0	0	1	0	1	0	1
2	Chr1	201952116	201952616	intragenic_2620	0.949668	down	NAV1	0	1	0	0	0	0	0	0	0	0	0	2	0	0	1	0	0	0	0	1	0		1	1	0	1
3	Chr1	201515185	201515685	unidirectional_1575	0.563744	down	NAV1	0	0	0	0	0	0	0	0	0	0	0	0	0	0	0	0	0	0	0	0	0		0	0	0	0
1	Chr6	138898379	138898879	bidirectional_1455	1.37289	up	NHSL1	0	1	0	0	0	0	0	3	3	0	0	0	0	1	1	1	1	1	1	1	0	1	0	0	0	0
2	Chr6	138715055	138715555	bidirectional_3861	1.22951	up	NHSL1	0	1	0	0	0	0	1	0	0	0	0	0	0	0	1	0	0	0	0	1	0		0	0	0	0
3	Chr6	138900282	138900782	bidirectional_3862	1.30778	up	NHSL1	0	0	0	0	0	0	0	0	0	0	0	0	0	0	0	0	0	0	0	0	0		0	0	0	0
4	Chr6	138738335	138738835	intragenic_3519	1.46244	up	NHSL1	0	0	0	0	0	0	0	0	0	0	0	0	0	0	0	0	0	0	0	0	0		0	0	0	0
5	Chr6	138908102	138908602	unidirectional_6894	1.4642	up	NHSL1	0	0	0	0	0	0	0	0	0	0	0	0	0	0	0	0	0	0	0	0	0		0	0	0	0
1	Chr3	196181572	196182072	bidirectional_2667	0.911363	down	NRROS	0	0	0	0	0	0	0	0	1	0	0	0	0	0	0	0	0	0	1	1	0	1	0	0	0	0
2	Chr3	196019089	196019589	intragenic_10845	1.61328	down	NRROS	0	0	0	0	0	0	1	0	0	0	0	1	0	0	0	0	0	0	0	0	0		0	1	0	1
3	Chr3	196227453	196227953	intragenic_11644	2.60072	down	NRROS	0	0	0	0	0	1	1	2	1	0	0	0	0	0	0	1	1	1	1	1	0		0	0	0	0
4	Chr3	196467083	196467583	intragenic_2098	1.1161	down	NRROS	0	0	0	0	0	1	1	0	0	0	0	0	0	0	0	0	0	0	0	0	0		0	0	0	0
5	Chr3	196594998	196595498	intragenic_8847	0.972598	down	NRROS	0	0	0	0	0	0	0	0	0	0	0	1	0	0	0	0	0	0	0	0	0		0	1	0	1
1	Chr10	72268601	72269101	intragenic_5384	0.565273	down	PALD1	1	1	0	0	0	0	1	0	0	1	0	3	0	0	1	1	1	1	1	1	1	1	1	1	1	0
2	Chr10	71905263	71905763	intragenic_541	0.956015	down	PALD1	0	1	0	0	0	0	1	0	0	0	0	0	0	0	1	0	0	0	0	1	0		0	0	0	0
3	Chr10	72239840	72240340	intragenic_594	1.11556	down	PALD1	1	0	0	0	0	0	1	0	0	0	0	2	0	0	1	0	0	0	0	1	0		1	1	0	1
4	Chr10	72253588	72254088	intragenic_7448	1.11853	down	PALD1	0	0	0	0	0	0	1	0	1	0	0	1	0	0	0	0	0	0	1	1	0		0	1	1	0
5	Chr10	72332359	72332859	unidirectional_829	0.872567	down	PALD1	0	0	0	0	0	0	0	0	0	0	0	0	0	0	0	0	0	0	0	0	0		0	0	0	0
1	Chr10	27088286	27088786	intragenic_4320	1.07773	down	PDSS1	0	1	0	0	1	0	1	0	0	0	0	0	0	0	1	0	0	0	0	1	0	1	0	0	0	0
2	Chr10	27044369	27044869	intragenic_5289	0.94711	down	PDSS1	0	1	0	0	1	1	1	0	0	0	0	0	0	0	1	0	0	0	0	1	0		0	0	0	0
3	Chr10	26728758	26729258	intragenic_5706	0.987116	down	PDSS1	0	0	0	0	1	1	1	0	0	0	0	1	0	0	0	0	0	0	0	0	0		0	1	0	1
4	Chr10	27093953	27094453	intragenic_5967	0.594264	down	PDSS1	0	1	0	0	1	0	1	1	1	0	0	0	0	1	1	1	1	1	1	1	0		0	0	0	0
5	Chr10	26681225	26681725	unidirectional_1434	0.819208	down	PDSS1	0	0	0	0	0	0	0	0	0	0	0	2	0	0	0	0	0	0	0	0	0		1	1	0	1
1	Chr12	76178294	76178794	bidirectional_977	2.16497	up	PHLDA1	0	0	0	0	0	0	0	2	2	0	0	0	0	0	0	1	1	1	1	1	0	1	0	0	0	0
2	Chr12	76100510	76101010	unidirectional_10486	2.04784	up	PHLDA1	0	0	0	0	0	1	0	0	0	0	0	2	0	0	0	0	0	0	0	0	0		1	1	0	1
3	Chr12	76247281	76247781	unidirectional_3028	2.73702	up	PHLDA1	0	1	0	0	0	0	0	0	0	0	0	1	0	0	1	0	0	0	0	1	0		1	1	0	1
4	Chr12	76152926	76153426	unidirectional_558	0.604688	up	PHLDA1	0	0	0	0	0	0	0	1	1	0	0	0	0	0	0	1	1	1	1	1	0		0	0	0	0
5	Chr12	76357977	76358477	unidirectional_9589	1.77393	up	PHLDA1	0	0	0	0	0	0	0	0	0	0	0	3	0	0	0	0	0	0	0	0	0		1	1	0	1
1	Chr22	50699256	50699756	intragenic_1972	1.59288	up	PPP6R2	0	1	0	0	0	0	0	0	0	0	0	0	0	0	1	0	0	0	0	1	0	1	0	0	0	0
2	Chr22	50682811	50683311	intragenic_4816	2.28932	up	PPP6R2	0	1	0	0	0	0	1	0	1	0	0	0	0	1	1	0	1	1	1	1	0		0	0	0	0
3	Chr22	50752778	50753278	intragenic_5108	2.88943	up	PPP6R2	1	1	1	0	0	1	1	0	0	0	0	1	0	0	1	0	0	0	0	1	1		1	1	0	1
4	Chr22	50688830	50689330	intragenic_6049	1.88605	up	PPP6R2	0	1	0	0	0	0	0	1	0	0	0	1	0	0	1	0	1	1	1	1	0		1	1	1	0
5	Chr22	50544127	50544627	intragenic_9228	2.77977	up	PPP6R2	0	0	0	0	0	0	0	0	0	0	0	2	0	0	0	0	0	0	0	0	0		1	1	0	1
1	ChrY	7469620	7470120	bidirectional_3893	2.34272	up	PRKY	0	0	0	0	0	0	0	0	0	0	0	1	0	0	0	0	0	0	0	0	0	1	0	1	0	1
2	ChrY	6843718	6844218	intragenic_10271	0.941823	up	PRKY	0	0	0	0	0	0	0	0	0	0	0	0	0	0	0	0	0	0	0	0	0		0	0	0	0
3	ChrY	6845713	6846213	intragenic_1446	1.18338	up	PRKY	0	0	0	0	0	0	0	0	1	0	0	1	0	0	0	0	0	0	1	1	0		0	1	1	0
4	ChrY	7207895	7208395	intragenic_7652	0.414061	up	PRKY	0	0	0	0	0	0	0	0	0	0	0	2	0	0	0	0	0	0	0	0	0		1	1	0	1
5	ChrY	7142726	7143226	intragenic_8457	2.24496	up	PRKY	0	0	0	0	0	0	0	0	0	0	0	2	0	0	0	0	0	0	0	0	0		1	1	0	1
1	Chr14	52642683	52643183	bidirectional_1852	1.28196	up	PTGDR	0	1	0	0	0	0	1	2	3	0	0	4	0	1	1	1	1	1	1	1	0	1	1	1	1	0
2	Chr14	52642305	52642805	bidirectional_2979	1.17477	up	PTGDR	0	1	0	0	0	0	1	1	1	0	0	1	0	1	1	1	1	1	1	1	0		1	1	1	0
3	Chr14	52456698	52457198	intragenic_10396	0.878977	up	PTGDR	0	0	0	0	0	0	1	1	2	0	0	1	0	0	0	1	1	1	1	1	0		0	1	1	0
4	Chr14	52781871	52782371	intragenic_7709	1.49173	up	PTGDR	0	0	1	0	0	1	0	0	0	0	0	1	0	0	0	0	0	0	0	0	0		0	1	0	1
5	Chr14	52598238	52598738	unidirectional_2148	1.08335	up	PTGDR	0	0	0	0	0	0	0	0	0	0	0	1	0	0	0	0	0	0	0	0	0		0	1	0	1
1	Chr11	67007989	67008489	intragenic_1617	1.14397	down	PTPRCAP	0	0	0	1	1	1	1	0	0	0	0	1	0	0	0	0	0	0	0	0	0	1	0	1	0	1
2	Chr11	67188412	67188912	intragenic_1680	0.870488	down	PTPRCAP	0	1	0	0	0	0	1	0	0	0	0	0	0	0	1	0	0	0	0	1	0		0	0	0	0
3	Chr11	67044674	67045174	intragenic_2447	0.630621	down	PTPRCAP	1	1	0	1	1	1	1	0	0	0	0	2	0	1	1	0	1	1	1	1	1		1	1	1	0
4	Chr11	67415507	67416007	intragenic_5388	0.602272	down	PTPRCAP	0	0	0	0	0	0	1	0	0	0	0	0	0	0	0	0	0	0	0	0	0		0	0	0	0
5	Chr11	67414110	67414610	intragenic_9874	1.32629	down	PTPRCAP	1	1	1	0	0	0	0	1	1	0	0	1	1	1	1	1	1	1	1	1	1		1	1	1	0
1	Chr12	113489256	113489756	bidirectional_833	1.26267	up	RASAL1	0	0	0	0	1	0	1	0	0	0	0	0	0	0	0	0	0	0	0	0	0	1	0	0	0	0
2	Chr12	113417000	113417500	intragenic_1496	1.00756	up	RASAL1	0	0	0	0	0	0	1	2	3	0	0	1	0	0	0	1	1	1	1	1	0		0	1	1	0
3	Chr12	113611135	113611635	intragenic_1584	1.22798	up	RASAL1	0	1	0	0	0	0	0	1	1	0	0	0	0	0	1	1	1	1	1	1	0		0	0	0	0
4	Chr12	113568107	113568607	intragenic_7795	1.19191	up	RASAL1	0	1	0	0	0	0	0	0	0	0	0	0	0	0	1	0	0	0	0	1	0		0	0	0	0
5	Chr12	113495869	113496369	intragenic_8531	0.865994	up	RASAL1	0	0	0	0	1	0	1	0	0	0	0	1	0	0	0	0	0	0	0	0	0		0	1	0	1
1	Chr11	64863933	64864433	intragenic_1125	1.38927	down	RASGRP2	0	1	0	0	0	0	0	0	0	0	0	0	0	0	1	0	0	0	0	1	0	1	0	0	0	0
2	Chr11	64809082	64809582	intragenic_12681	1.439	down	RASGRP2	0	0	0	0	0	0	0	0	0	0	0	0	0	0	0	0	0	0	0	0	0		0	0	0	0
3	Chr11	64809082	64809582	intragenic_12681	1.38301	down	RASGRP2	0	0	0	0	0	0	0	0	0	0	0	0	0	0	0	0	0	0	0	0	0		0	0	0	0
4	Chr11	64455873	64456373	intragenic_7286	1.36277	down	RASGRP2	0	1	0	0	0	0	0	0	1	0	0	0	0	0	1	0	1	1	1	1	0		0	0	0	0
5	Chr11	64163568	64164068	unidirectional_6724	1.38904	down	RASGRP2	0	1	0	0	0	0	0	1	0	0	0	2	0	0	1	0	1	1	1	1	0		1	1	1	0
1	Chr20	62670126	62670626	intragenic_1668	0.841712	down	RGS19	0	1	0	0	0	0	0	0	0	0	0	1	0	0	1	0	0	0	0	1	0	1	1	1	0	1
2	Chr20	62708365	62708865	intragenic_4127	0.950564	down	RGS19	1	1	0	0	0	1	1	0	0	0	0	2	0	0	1	0	0	0	0	1	1		1	1	0	1
3	Chr20	62507791	62508291	intragenic_4842	2.59181	down	RGS19	0	1	0	0	0	1	0	0	0	0	0	2	0	0	1	0	0	0	0	1	0		1	1	0	1
4	Chr20	62635839	62636339	intragenic_5012	1.57969	down	RGS19	0	0	0	0	0	0	0	0	0	0	0	0	0	0	0	0	0	0	0	0	0		0	0	0	0
5	Chr20	62743634	62744134	unidirectional_4592	2.59254	down	RGS19	0	1	0	0	0	0	0	0	1	1	0	1	0	0	1	1	1	1	1	1	0		1	1	1	0
1	Chr22	22012324	22012824	intragenic_13872	0.938683	down	RIMBP3B	0	1	0	0	0	0	0	0	0	0	0	1	0	0	1	0	0	0	0	1	0	1	1	1	0	1
2	Chr22	22170861	22171361	intragenic_4415	1.43179	down	RIMBP3B	1	0	0	1	1	1	1	1	1	0	0	1	1	0	1	1	1	1	1	1	0		1	1	1	0
1	Chr5	177869313	177869813	intragenic_3960	1.39022	down	RMND5B	0	0	0	0	0	1	0	0	0	0	0	1	0	0	0	0	0	0	0	0	0	1	0	1	0	1
2	Chr5	177545133	177545633	intragenic_4236	0.849784	down	RMND5B	1	1	0	0	0	0	1	0	0	0	0	2	0	0	1	0	0	0	0	1	1		1	1	0	1
3	Chr5	177548450	177548950	intragenic_5370	0.857196	down	RMND5B	0	0	0	0	0	0	0	0	0	0	0	2	0	0	0	0	0	0	0	0	0		1	1	0	1
4	Chr5	177558345	177558845	intragenic_7096	1.56503	down	RMND5B	0	0	0	0	0	0	0	1	1	0	0	0	0	0	0	1	1	1	1	1	0		0	0	0	0
1	ChrY	2871239	2871739	bidirectional_1756	0.924307	up	RPS4Y1	0	0	0	0	0	0	0	0	1	0	0	1	0	0	0	0	0	0	1	1	0	1	0	1	1	0
2	Chr3	10283962	10284462	intragenic_11214	0.854184	up	RPS4Y1	0	1	1	0	0	0	0	1	1	0	0	0	0	1	1	1	1	1	1	1	0		0	0	0	0
3	ChrY	2803682	2804182	intragenic_1459	1.11965	up	RPS4Y1	0	0	0	0	0	0	0	0	0	0	0	0	0	0	0	0	0	0	0	0	0		0	0	0	0
4	ChrY	2709630	2710130	intragenic_7651	0.86766	up	RPS4Y1	1	0	0	0	0	0	0	0	0	0	0	1	1	0	1	1	0	1	1	1	0		1	1	1	0
5	Chr11	67275097	67275597	intragenic_8524	0.918583	up	RPS4Y1	0	1	0	0	0	0	1	0	0	0	0	1	0	0	1	0	0	0	0	1	0		1	1	0	1
1	Chr9	140022949	140023449	bidirectional_107	1.09958	down	SAPCD2	0	0	0	0	0	1	1	0	0	0	0	0	0	0	0	0	0	0	0	0	0	1	0	0	0	0
2	Chr9	140023997	140024497	bidirectional_108	0.841888	down	SAPCD2	0	0	0	0	0	1	1	0	0	0	0	0	0	0	0	0	0	0	0	0	0		0	0	0	0
3	Chr9	140023590	140024090	bidirectional_109	1.08241	down	SAPCD2	0	0	0	0	0	1	1	0	0	0	0	1	0	0	0	0	0	0	0	0	0		0	1	0	1
4	Chr9	139581301	139581801	intragenic_4359	0.976978	down	SAPCD2	1	0	0	0	0	0	0	0	0	0	0	1	0	0	1	0	0	0	0	1	0		1	1	0	1
5	Chr9	140094530	140095030	intragenic_9586	0.960563	down	SAPCD2	0	0	0	0	0	0	0	0	0	0	0	0	0	0	0	0	0	0	0	0	0		0	0	0	0
1	Chr10	7513889	7514389	bidirectional_17	1.48592	up	SFMBT2	0	1	0	0	0	0	1	0	0	0	0	1	0	0	1	0	0	0	0	1	0	1	1	1	0	1
2	Chr10	7513638	7514138	bidirectional_18	1.32914	up	SFMBT2	0	1	0	0	0	0	1	0	0	0	0	1	0	0	1	0	0	0	0	1	0		1	1	0	1
3	Chr10	7515651	7516151	bidirectional_2035	1.2686	up	SFMBT2	0	0	0	0	0	0	1	1	1	0	0	0	0	0	0	1	1	1	1	1	0		0	0	0	0
4	Chr10	7515902	7516402	bidirectional_700	1.50393	up	SFMBT2	0	0	0	0	0	0	1	0	0	0	0	0	0	0	0	0	0	0	0	0	0		0	0	0	0
5	Chr10	7522705	7523205	bidirectional_708	1.56413	up	SFMBT2	0	1	0	0	0	0	1	1	1	0	0	1	0	0	1	1	1	1	1	1	0		1	1	1	0
1	Chr8	8086532	8087032	intragenic_1827	1.84979	up	SGK223	0	1	0	0	0	0	0	1	0	0	0	1	0	0	1	0	1	1	1	1	0	1	1	1	1	0
2	Chr8	8096085	8096585	intragenic_4087	1.46638	up	SGK223	1	1	1	0	0	0	0	0	0	0	0	1	0	0	1	0	0	0	0	1	1		1	1	0	1
3	Chr8	8202050	8202550	intragenic_7270	1.05001	up	SGK223	0	1	0	0	1	1	1	1	0	0	0	0	0	0	1	0	1	1	1	1	0		0	0	0	0
4	Chr8	8242790	8243290	unidirectional_3904	2.04756	up	SGK223	0	1	0	0	1	0	1	1	1	0	0	0	0	1	1	1	1	1	1	1	0		0	0	0	0
5	Chr8	8167894	8168394	unidirectional_5910	1.47115	up	SGK223	0	1	0	0	0	0	0	0	0	0	0	1	0	0	1	0	0	0	0	1	0		1	1	0	1
1	Chr9	130624397	130624897	bidirectional_1444	1.06927	down	SH2D3C	1	1	1	0	0	1	1	0	2	1	0	1	0	0	1	1	1	1	1	1	1	1	1	1	1	0
2	Chr9	130624712	130625212	bidirectional_1445	1.01164	down	SH2D3C	1	1	0	0	0	1	1	0	0	1	0	0	0	0	1	1	1	1	1	1	1		0	0	0	0
3	Chr9	130678041	130678541	intragenic_1253	1.03559	down	SH2D3C	0	1	0	0	1	0	1	0	0	0	0	0	0	0	1	0	0	0	0	1	0		0	0	0	0
4	Chr9	130558955	130559455	intragenic_13278	1.02844	down	SH2D3C	1	1	0	0	0	1	1	1	1	0	0	0	1	0	1	1	1	1	1	1	1		0	0	0	0
5	Chr9	130644955	130645455	unidirectional_2267	1.02511	down	SH2D3C	1	1	0	0	0	0	0	0	0	0	0	4	0	0	1	0	0	0	0	1	1		1	1	0	1
1	Chr11	111445068	111445568	bidirectional_1753	1.56142	up	SIK2	0	0	0	0	0	0	0	0	0	0	0	0	0	0	0	0	0	0	0	0	0	1	0	0	0	0
2	Chr11	111797392	111797892	intragenic_372	1.84121	up	SIK2	0	1	0	0	0	1	1	0	0	0	0	1	0	0	1	0	0	0	0	1	0		1	1	0	1
3	Chr11	111585949	111586449	intragenic_4540	0.956622	up	SIK2	0	1	0	0	0	0	0	0	0	0	0	1	0	0	1	0	0	0	0	1	0		1	1	0	1
4	Chr11	111504614	111505114	intragenic_6361	0.708296	up	SIK2	0	0	0	0	0	0	0	3	3	0	0	1	0	0	0	1	1	1	1	1	0		0	1	1	0
5	Chr11	111202117	111202617	unidirectional_11359	1.23586	up	SIK2	0	0	0	0	0	0	0	1	1	0	0	1	0	0	0	1	1	1	1	1	0		0	1	1	0
1	Chr8	121928769	121929269	bidirectional_3055	2.9051	up	SNTB1	0	0	0	0	0	0	0	1	1	0	0	0	0	0	0	1	1	1	1	1	0	1	0	0	0	0
2	Chr8	121761690	121762190	intragenic_11475	2.70602	up	SNTB1	1	1	0	0	0	1	1	3	4	0	0	1	1	1	1	1	1	1	1	1	1		1	1	1	0
3	Chr8	121822062	121822562	intragenic_13	1.45174	up	SNTB1	0	1	0	0	0	1	1	0	0	0	0	1	0	0	1	0	0	0	0	1	0		1	1	0	1
4	Chr8	121744550	121745050	intragenic_6488	2.12461	up	SNTB1	0	1	1	0	0	0	0	1	1	0	0	0	0	1	1	1	1	1	1	1	0		0	0	0	0
5	Chr8	121873566	121874066	unidirectional_2422	1.50937	up	SNTB1	0	0	0	0	0	1	0	0	0	0	0	0	0	0	0	0	0	0	0	0	0		0	0	0	0
1	Chr12	94034289	94034789	bidirectional_2401	0.92817	down	SOCS2	0	0	0	0	0	0	0	1	1	0	0	0	0	0	0	1	1	1	1	1	0	1	0	0	0	0
2	Chr12	93861771	93862271	intragenic_11311	2.47797	down	SOCS2	0	0	0	0	0	0	0	1	1	0	0	0	0	0	0	1	1	1	1	1	0		0	0	0	0
3	Chr12	93967486	93967986	intragenic_5236	2.44682	down	SOCS2	0	0	0	1	0	1	0	0	0	0	0	1	0	0	0	0	0	0	0	0	0		0	1	0	1
4	Chr12	94136361	94136861	intragenic_7202	1.36639	down	SOCS2	0	0	0	0	0	1	1	0	0	0	0	0	0	0	0	0	0	0	0	0	0		0	0	0	0
1	Chr12	93861771	93862271	intragenic_11311	2.14515	down	SOCS2-AS1	0	0	0	0	0	0	0	1	1	0	0	0	0	0	0	1	1	1	1	1	0	1	0	0	0	0
2	Chr12	93861330	93861830	intragenic_3112	3.38027	down	SOCS2-AS1	0	1	0	0	0	0	0	0	0	2	0	0	0	0	1	1	1	1	1	1	0		0	0	0	0
3	Chr12	93967486	93967986	intragenic_5236	2.82728	down	SOCS2-AS1	0	0	0	1	0	1	0	0	0	0	0	1	0	0	0	0	0	0	0	0	0		0	1	0	1
4	Chr12	94136361	94136861	intragenic_7202	1.6434	down	SOCS2-AS1	0	0	0	0	0	1	1	0	0	0	0	0	0	0	0	0	0	0	0	0	0		0	0	0	0
1	Chr16	29713213	29713713	intragenic_13212	1.38736	down	SPN	0	1	0	0	0	0	1	1	1	0	0	1	0	1	1	1	1	1	1	1	0	1	1	1	1	0
2	Chr16	29657017	29657517	intragenic_13471	2.35806	down	SPN	0	0	0	0	0	1	1	0	0	0	0	1	0	0	0	0	0	0	0	0	0		0	1	0	1
3	Chr16	29611308	29611808	intragenic_13491	1.30865	down	SPN	1	1	1	0	0	1	1	0	0	0	0	1	0	0	1	0	0	0	0	1	1		1	1	0	1
4	Chr16	29656618	29657118	intragenic_13740	1.65325	down	SPN	1	0	0	0	0	1	1	0	1	0	0	2	0	0	1	1	0	1	1	1	0		1	1	1	0
1	Chr2	65432506	65433006	bidirectional_1163	1.63073	up	SPRED2	0	0	0	0	0	0	1	0	0	0	0	0	0	0	0	0	0	0	0	0	0	1	0	0	0	0
2	Chr2	65657792	65658292	intragenic_5062	1.60359	up	SPRED2	0	1	0	0	0	0	1	0	0	0	0	0	0	0	1	0	0	0	0	1	0		0	0	0	0
3	Chr2	65509189	65509689	unidirectional_1646	1.21	up	SPRED2	0	0	0	0	0	0	0	0	0	0	0	0	0	0	0	0	0	0	0	0	0		0	0	0	0
1	Chr2	54984693	54985193	intragenic_2352	2.4435	up	SPTBN1	0	0	0	0	0	0	1	0	0	0	0	2	0	0	0	0	0	0	0	0	0	1	1	1	0	1
2	Chr2	54797994	54798494	intragenic_3342	1.63502	up	SPTBN1	1	1	0	1	1	1	1	1	1	0	0	1	1	1	1	1	1	1	1	1	1		1	1	1	0
3	Chr2	54855436	54855936	intragenic_4056	1.31277	up	SPTBN1	0	1	0	0	1	0	1	1	1	0	0	0	0	1	1	1	1	1	1	1	0		0	0	0	0
4	Chr2	54801490	54801990	intragenic_8048	1.57809	up	SPTBN1	0	0	0	1	1	1	1	2	2	0	0	0	0	0	0	1	1	1	1	1	0		0	0	0	0
5	Chr2	54760153	54760653	intragenic_8587	2.81253	up	SPTBN1	0	1	0	0	0	0	0	0	0	0	0	0	0	0	1	0	0	0	0	1	0		0	0	0	0
1	Chr8	125763966	125764466	bidirectional_4796	4.54371	down	SQLE	1	1	0	0	0	0	0	0	0	0	0	2	0	0	1	0	0	0	0	1	1	1	1	1	0	1
2	Chr8	125649900	125650400	intragenic_12406	6.30476	down	SQLE	1	1	0	0	1	1	1	1	1	0	0	1	0	0	1	1	1	1	1	1	1		1	1	1	0
3	Chr8	125616859	125617359	intragenic_3161	3.91264	down	SQLE	1	1	0	0	1	0	1	0	1	0	0	1	1	1	1	1	1	1	1	1	1		1	1	1	0
4	Chr8	125616907	125617407	intragenic_9447	3.28158	down	SQLE	0	1	0	0	1	0	1	0	1	0	0	1	1	1	1	1	1	1	1	1	0		1	1	1	0
5	Chr8	125810368	125810868	unidirectional_2355	2.3255	down	SQLE	0	1	1	0	0	0	0	1	1	0	0	0	0	0	1	1	1	1	1	1	0		0	0	0	0
1	Chr6	32862266	32862766	intragenic_1252	0.760283	down	TAP1	0	0	0	0	0	0	1	0	0	0	0	1	0	0	0	0	0	0	0	0	0	1	0	1	0	1
2	Chr6	32632424	32632924	intragenic_4820	0.735037	down	TAP1	0	0	0	0	1	0	1	0	0	0	0	0	0	0	0	0	0	0	0	0	0		0	0	0	0
3	Chr6	32941609	32942109	intragenic_8731	3.02809	down	TAP1	0	1	0	1	1	1	1	0	0	0	0	0	0	0	1	0	0	0	0	1	0		0	0	0	0
1	Chr11	67188412	67188912	intragenic_1680	2.33518	down	TBC1D10C	0	1	0	0	0	0	1	0	0	0	0	0	0	0	1	0	0	0	0	1	0	1	0	0	0	0
2	Chr11	67037564	67038064	intragenic_2696	1.87893	down	TBC1D10C	0	0	0	1	1	1	1	1	1	0	0	1	0	0	0	1	1	1	1	1	0		0	1	1	0
3	Chr11	67039022	67039522	intragenic_4283	1.23725	down	TBC1D10C	1	1	0	1	1	1	1	0	0	0	0	0	0	0	1	0	0	0	0	1	1		0	0	0	0
4	Chr11	67035666	67036166	intragenic_665	2.71821	down	TBC1D10C	1	1	0	1	1	1	1	0	0	0	0	1	0	0	1	0	0	0	0	1	1		1	1	0	1
5	Chr11	67040683	67041183	intragenic_8092	0.851128	down	TBC1D10C	0	1	0	1	1	1	1	0	0	0	0	1	0	0	1	0	0	0	0	1	0		1	1	0	1
1	ChrY	6843718	6844218	intragenic_10271	1.28949	up	TBL1Y	0	0	0	0	0	0	0	0	0	0	0	0	0	0	0	0	0	0	0	0	0	1	0	0	0	0
2	ChrY	6845713	6846213	intragenic_1446	1.53916	up	TBL1Y	0	0	0	0	0	0	0	0	1	0	0	1	0	0	0	0	0	0	1	1	0		0	1	1	0
1	Chr10	25011547	25012047	intragenic_4319	1.22689	down	THNSL1	0	1	0	0	0	1	0	1	1	0	0	0	0	1	1	1	1	1	1	1	0	1	0	0	0	0
1	Chr6	138020239	138020739	bidirectional_2217	1.00616	down	TNFAIP3	0	0	0	0	0	1	0	0	0	0	0	0	0	0	0	0	0	0	0	0	0	1	0	0	0	0
2	Chr6	138202045	138202545	intragenic_2367	1.06656	down	TNFAIP3	0	0	0	0	1	0	1	0	0	0	0	1	0	0	0	0	0	0	0	0	0		0	1	0	1
3	Chr6	138192393	138192893	intragenic_6235	0.662107	down	TNFAIP3	0	0	0	0	1	0	1	0	0	0	0	1	0	0	0	0	0	0	0	0	0		0	1	0	1
4	Chr6	138189133	138189633	intragenic_761	1.53931	down	TNFAIP3	0	1	1	0	1	1	1	0	0	0	0	0	0	0	1	0	0	0	0	1	0		0	0	0	0
5	Chr6	138204568	138205068	intragenic_8733	1.0859	down	TNFAIP3	0	0	0	0	1	1	1	0	0	0	0	1	0	0	0	0	0	0	0	0	0		0	1	0	1
1	Chr5	133262680	133263180	bidirectional_4588	1.55851	down	VDAC1	0	0	0	0	1	0	1	1	1	0	0	0	0	0	0	1	1	1	1	1	0	1	0	0	0	0
2	Chr5	133426164	133426664	bidirectional_4893	2.37083	down	VDAC1	0	1	0	0	0	0	1	1	1	0	0	1	0	1	1	1	1	1	1	1	0		1	1	1	0
3	Chr5	133560880	133561380	intragenic_3149	2.51313	down	VDAC1	0	1	0	0	0	1	1	1	1	0	0	0	0	0	1	1	1	1	1	1	0		0	0	0	0
4	Chr5	133330561	133331061	intragenic_5175	2.42134	down	VDAC1	0	0	0	0	0	1	0	0	0	0	0	0	0	0	0	0	0	0	0	0	0		0	0	0	0
5	Chr5	133707581	133708081	intragenic_7759	2.28144	down	VDAC1	0	0	0	0	0	1	1	0	0	0	0	0	0	0	0	0	0	0	0	0	0		0	0	0	0
1	Chr22	28901670	28902170	intragenic_6264	2.18478	down	XBP1	0	1	0	0	0	0	0	0	0	1	0	0	0	0	1	0	1	1	1	1	0	1	0	0	0	0
2	Chr22	29211034	29211534	unidirectional_1315	1.56508	down	XBP1	0	0	0	1	0	1	0	1	1	0	0	2	0	0	0	1	1	1	1	1	0		1	1	1	0
3	Chr22	29207558	29208058	unidirectional_1360	1.1235	down	XBP1	1	0	0	1	0	1	0	0	0	0	0	1	0	0	1	0	0	0	0	1	0		1	1	0	1
4	Chr22	29208038	29208538	unidirectional_5988	1.42903	down	XBP1	1	0	0	1	0	1	0	1	1	0	0	2	0	0	1	1	1	1	1	1	0		1	1	1	0
1	ChrY	2871239	2871739	bidirectional_1756	1.20457	up	ZFY	0	0	0	0	0	0	0	0	1	0	0	1	0	0	0	0	0	0	1	1	0	1	0	1	1	0
2	ChrY	2803682	2804182	intragenic_1459	1.04186	up	ZFY	0	0	0	0	0	0	0	0	0	0	0	0	0	0	0	0	0	0	0	0	0		0	0	0	0
3	ChrY	2709630	2710130	intragenic_7651	1.0316	up	ZFY	1	0	0	0	0	0	0	0	0	0	0	1	1	0	1	1	0	1	1	1	0		1	1	1	0
4	ChrY	2914826	2915326	unidirectional_8337	1.06106	up	ZFY	0	0	0	0	0	0	0	0	0	0	0	0	0	0	0	0	0	0	0	0	0		0	0	0	0
1	Chr19	58427476	58427976	intragenic_10598	1.41294	down	ZNF544	1	0	0	0	0	0	0	0	0	0	0	1	0	0	1	0	0	0	0	1	0	1	1	1	0	1
2	Chr19	58694463	58694963	intragenic_1205	1.46213	down	ZNF544	0	0	0	0	0	0	0	0	0	0	0	0	0	0	0	0	0	0	0	0	0		0	0	0	0
							104 transcripts
							SUM:	96	220	20	47	84	185	245							SUM:	247	146	156	162	180	315	69	103	179	244	97	147

## Sheet: Table S2. Enhancer-centric
Table S2. Significantly regulated genes associated with E/R-regulated enhancers.
enhancers per transcript	enhancer Chr	enhancer start	enhancer end	enhancer ID	strand	gene Chr	gene start	gene end	gene symbol	strand	euclidian distance	correlation	gene fold change E/R24h vs. LUC24h	enhancer fold change E/R24h vs. LUC24h	Detected as a superenhancer in CD34+ or CD19/20+ cells	repressed
1	Chr21	46494675	46547631	CD19.CD20_REG7987	+	Chr21	46494492	46894492	ADARB1	+	1.24017	0.720038	-0.452739	-1.40156		1	0
2	Chr21	46527868	46531868	PEAKM_Runx1_SEChr21-3	+	Chr21	46494492	46894492	ADARB1	+	1.74978	0.57645	-0.452739	-1.67821		1	0
3	Chr21	46529083	46530269	CD34_REG9692	+	Chr21	46494492	46894492	ADARB1	+	2.18822	0.576301	-0.452739	-1.6671		1	0
1	Chr12	1775741	1778324	CD34_REG3162	+	Chr12	1400245	1800245	ADIPOR2	+	1.76292	0.904267	-0.334751	-1.42462		1	0
1	Chr11	67024921	67056775	CD34_SE172	+	Chr11	66633903	67033903	ADRBK1	+	0.30028	0.873062	-0.499082	-0.619322	1	1	0
2	Chr11	67005459	67058329	CD19.CD20_SE198	+	Chr11	66633903	67033903	ADRBK1	+	0.311417	0.861689	-0.499082	-0.596193	1	1	0
3	Chr11	67166364	67189211	CD19.CD20_REG2220	+	Chr11	67033904	67433904	ADRBK1	+	0.737399	0.628525	-0.499082	-1.07111		1	0
4	Chr11	67043094	67047094	CD34_Runx1_PEAKChr11-55	+	Chr11	67033904	67433904	ADRBK1	+	1.11568	0.385122	-0.499082	-0.843993		1	0
5	Chr11	67164328	67177921	CD34_REG2792	+	Chr11	67033904	67433904	ADRBK1	+	1.31616	0.601977	-0.499082	-1.61076		1	0
6	Chr11	67037404	67041404	PEAKM_Runx1_SEChr11-13	+	Chr11	67033904	67433904	ADRBK1	+	1.52584	0.899793	-0.499082	-1.46657		1	0
1	Chr1	46007915	46012266	CD19.CD20_REG365	+	Chr1	45616453	46016453	AKR1A1	+	0.835504	0.478395	-0.283991	-0.68518		1	0
2	Chr1	46007679	46011679	PEAKM_Runx1_SEChr1-45	+	Chr1	45616453	46016453	AKR1A1	+	0.842021	0.551233	-0.283991	-0.756243		1	0
3	Chr1	46007612	46011612	CD34_Runx1_PEAKChr1-34	+	Chr1	45616453	46016453	AKR1A1	+	0.868384	0.550948	-0.283991	-0.790846		1	0
4	Chr1	46010576	46011391	CD34_REG468	+	Chr1	45616453	46016453	AKR1A1	+	1.19915	0.818447	-0.283991	-1.29357		1	0
1	Chr11	67005459	67058329	CD19.CD20_SE198	+	Chr11	66656760	67056760	ANKRD13D	+	0.345252	0.881915	-0.470004	-0.596193	1	1	0
2	Chr11	67024921	67056775	CD34_SE172	+	Chr11	66656760	67056760	ANKRD13D	+	0.411004	0.850242	-0.470004	-0.619322	1	1	0
3	Chr11	67043094	67047094	CD34_Runx1_PEAKChr11-55	+	Chr11	66656760	67056760	ANKRD13D	+	0.734349	0.867513	-0.470004	-0.843993		1	0
4	Chr11	67166364	67189211	CD19.CD20_REG2220	+	Chr11	67056761	67456761	ANKRD13D	+	0.783799	0.922988	-0.470004	-1.07111		1	0
5	Chr11	67164328	67177921	CD34_REG2792	+	Chr11	67056761	67456761	ANKRD13D	+	1.46416	0.914765	-0.470004	-1.61076		1	0
6	Chr11	67037404	67041404	PEAKM_Runx1_SEChr11-13	+	Chr11	66656760	67056760	ANKRD13D	+	1.88284	0.696172	-0.470004	-1.46657		1	0
1	ChrX	153245175	153252187	CD19.CD20_REG13351	+	ChrX	153191715	153591715	ARHGAP4	-	0.48578	0.612393	-0.562285	-0.549187		1	0
1	Chr19	7399111	7430093	CD19.CD20_SE486	+	Chr19	7059997	7459997	ARHGEF18	+	0.423371	0.769402	-0.410583	-0.660831	1	1	0
2	Chr19	7413369	7415482	CD34_REG7296	+	Chr19	7059997	7459997	ARHGEF18	+	0.432391	0.585083	-0.410583	-0.724453		1	0
3	Chr19	7447194	7474082	CD19.CD20_REG6049	+	Chr19	7059997	7459997	ARHGEF18	+	0.745758	0.716043	-0.410583	-0.631811		1	0
1	Chr19	50220682	50221327	CD19.CD20_REG6409	+	Chr19	50031957	50431957	ATF5	+	3.85571	0.247155	0.598201	2.49443		0	1
1	Chr17	3807098	3872953	CD19.CD20_SE408	+	Chr17	3467758	3867758	ATP2A3	-	0.432239	0.949011	-0.540466	-0.733252	1	1	0
2	Chr17	3862323	3878560	CD34_REG6141	+	Chr17	3467758	3867758	ATP2A3	-	0.847737	0.658465	-0.540466	-0.884519		1	0
1	Chr6	91084014	91103503	CD19.CD20_SE898	+	Chr6	91006563	91406563	BACH2	-	1.15888	0.402725	0.530862	0.589846	1	0	1
1	Chr17	79366216	79371571	CD34_REG6821	+	Chr17	78973538	79373538	BAHCC1	+	0.83817	0.948135	-0.731558	-0.421501		1	0
1	Chr12	122458559	122471198	CD19.CD20_REG3176	+	Chr12	122059859	122459859	BCL7A	+	0.431232	0.72262	-0.376442	-0.71471		1	0
2	Chr12	122440367	122444367	PEAKM_Runx1_SEChr12-21	+	Chr12	122059859	122459859	BCL7A	+	1.16715	0.0480682	-0.376442	-1.05152		1	0
3	Chr12	122429540	122443064	CD34_REG3938	+	Chr12	122059859	122459859	BCL7A	+	1.2003	0.00998333	-0.376442	-1.09157		1	0
4	Chr12	122248461	122250074	CD34_REG3932	+	Chr12	122059859	122459859	BCL7A	+	2.29537	0.089578	-0.376442	-1.39443		1	0
1	Chr10	98335589	98528465	CD19.CD20_SE155	+	Chr10	98031334	98431334	BLNK	-	2.10769	0.252871	0.479082	0.754703	1	0	1
1	Chr10	22603553	22630733	CD19.CD20_REG1400	+	Chr10	22210137	22610137	BMI1	+	0.158321	0.99437	-0.659745	-0.664599		1	0
2	Chr10	22601862	22615595	CD34_REG1806	+	Chr10	22210137	22610137	BMI1	+	0.268664	0.953866	-0.659745	-0.656013		1	0
3	Chr10	22628764	22630642	CD34_REG1807	+	Chr10	22610138	23010138	BMI1	+	0.320574	0.935337	-0.659745	-0.834458		1	0
4	Chr10	22723907	22729224	CD19.CD20_REG1401	+	Chr10	22610138	23010138	BMI1	+	0.639642	0.953407	-0.659745	-0.522579		1	0
1	Chr12	92733750	92736956	CD19.CD20_REG2957	+	Chr12	92539674	92939674	BTG1	-	2.32317	0.0727737	0.609834	1.75127		0	1
1	Chr15	83760676	83762432	CD34_REG5406	+	Chr15	83680394	84080394	C15orf40	-	2.8215	0.217199	0.316674	1.41944		0	1
2	Chr15	83760532	83761994	CD19.CD20_REG4406	+	Chr15	83680394	84080394	C15orf40	-	2.95466	0.215405	0.316674	1.48411		0	1
1	Chr19	1646125	1670557	CD19.CD20_REG5964	+	Chr19	1275519	1675519	C19orf24	+	0.219624	0.878869	-0.53115	-0.502455		1	0
2	Chr19	1130307	1137295	CD19.CD20_REG5952	+	Chr19	875518	1275518	C19orf24	+	1.1733	0.850702	-0.53115	-1.40412		1	0
1	Chr6	31617938	31622093	CD19.CD20_REG10584	+	Chr6	31402691	31802691	C6orf48	+	2.85332	0.808218	-0.316692	-1.82794		1	0
1	Chr4	110911048	110912898	CD19.CD20_REG9507	+	Chr4	110624630	111024630	CASP6	-	4.1873	0.545432	0.510511	2.00083		0	1
1	Chr16	66783283	66786474	CD19.CD20_REG4818	+	Chr16	66663048	67063048	CBFB	+	2.70599	0.8264	-0.255297	-1.61617		1	0
1	Chr19	35572993	35580319	CD19.CD20_REG6247	+	Chr19	35420070	35820070	CD22	+	3.43512	0.892972	0.354736	-1.39111		1	0
1	Chr14	105115799	105162782	CD19.CD20_SE338	+	Chr14	105087425	105487425	CDCA4	-	0.504968	0.57002	-0.407626	-0.520554	1	1	0
1	Chr9	130537919	130550856	CD19.CD20_REG12799	+	Chr9	130148303	130548303	CDK9	+	0.551667	0.56327	-0.468503	-0.766396		1	0
2	Chr9	130614881	130629494	CD19.CD20_REG12802	+	Chr9	130548304	130948304	CDK9	+	0.960787	0.466773	-0.468503	-0.931187		1	0
3	Chr9	130622343	130628156	CD34_REG15914	+	Chr9	130548304	130948304	CDK9	+	0.988645	0.398376	-0.468503	-0.979152		1	0
4	Chr9	130557392	130561392	PEAKM_Runx1_SEChr9-24	+	Chr9	130548304	130948304	CDK9	+	1.07336	0.448958	-0.468503	-1.05844		1	0
5	Chr9	130557887	130560101	CD19.CD20_REG12801	+	Chr9	130548304	130948304	CDK9	+	1.0986	0.45834	-0.468503	-0.981097		1	0
6	Chr9	130558456	130559827	CD34_REG15912	+	Chr9	130548304	130948304	CDK9	+	1.13469	0.504403	-0.468503	-1.09063		1	0
7	Chr9	130622658	130626658	CD34_Runx1_PEAKChr9-34	+	Chr9	130548304	130948304	CDK9	+	1.35121	0.237005	-0.468503	-1.07231		1	0
1	Chr22	46524635	46526586	CD19.CD20_REG8262	+	Chr22	46246193	46646193	CDPF1	-	2.42984	0.123948	-0.706485	-1.56095		1	0
1	Chr1	26663122	26664110	CD34_REG257	+	Chr1	26560692	26960692	CEP85	+	6.87947	0.481407	-0.278941	-2.48327		1	0
1	Chr7	2177187	2179256	CD19.CD20_REG11194	+	Chr7	2043193	2443193	CHST12	+	0.658809	0.638813	-0.574433	-0.909711		1	0
2	Chr7	2178113	2178747	CD34_REG13840	+	Chr7	2043193	2443193	CHST12	+	0.826452	0.701251	-0.574433	-0.740529		1	0
3	Chr7	2136069	2150879	CD19.CD20_REG11193	+	Chr7	2043193	2443193	CHST12	+	0.978243	0.666371	-0.574433	-0.670283		1	0
1	Chr19	42788668	42791387	CD19.CD20_REG6320	+	Chr19	42388815	42788815	CIC	+	1.53683	0.928059	-0.631826	-1.84972		1	0
1	Chr12	9788063	9838708	CD19.CD20_SE231	+	Chr12	9422306	9822306	CLEC2D	+	0.559625	0.877664	-0.659347	-0.630416	1	1	0
2	Chr12	9799567	9804966	CD34_REG3234	+	Chr12	9422306	9822306	CLEC2D	+	0.705266	0.781432	-0.659347	-0.81254		1	0
1	Chr5	157019174	157020358	CD34_REG12646	+	Chr5	156886183	157286183	CLINT1	-	3.21253	0.853167	0.279316	1.72336		0	1
1	Chr15	68869595	68886805	CD19.CD20_REG4299	+	Chr15	68522081	68922081	CLN6	-	1.05062	0.686714	-0.314449	-0.869957		1	0
1	Chr3	32431992	32559170	CD19.CD20_SE708	+	Chr3	32033161	32433161	CMTM7	+	0.285575	0.985796	-0.524189	-0.533631	1	1	0
1	Chr10	22601862	22615595	CD34_REG1806	+	Chr10	22205310	22605310	COMMD3	+	0.570954	0.569186	-1.02502	-0.656013		1	0
2	Chr10	22603553	22630733	CD19.CD20_REG1400	+	Chr10	22205310	22605310	COMMD3	+	0.589229	0.590933	-1.02502	-0.664599		1	0
3	Chr10	22628764	22630642	CD34_REG1807	+	Chr10	22605311	23005311	COMMD3	+	0.59067	0.75331	-1.02502	-0.834458		1	0
4	Chr10	22723907	22729224	CD19.CD20_REG1401	+	Chr10	22605311	23005311	COMMD3	+	0.786519	0.703311	-1.02502	-0.522579		1	0
1	Chr10	22603553	22630733	CD19.CD20_REG1400	+	Chr10	22205310	22605310	COMMD3-BMI1	+	0.216545	0.963458	-0.745655	-0.664599		1	0
2	Chr10	22628764	22630642	CD34_REG1807	+	Chr10	22605311	23005311	COMMD3-BMI1	+	0.260921	0.973702	-0.745655	-0.834458		1	0
3	Chr10	22601862	22615595	CD34_REG1806	+	Chr10	22205310	22605310	COMMD3-BMI1	+	0.2898	0.913292	-0.745655	-0.656013		1	0
4	Chr10	22723907	22729224	CD19.CD20_REG1401	+	Chr10	22605311	23005311	COMMD3-BMI1	+	0.614799	0.95254	-0.745655	-0.522579		1	0
1	Chr15	75079371	75083371	PEAKM_Runx1_SEChr15-23	+	Chr15	75074424	75474424	CSK	+	1.96345	0.900054	-0.598749	-1.83422		1	0
1	Chr4	110911048	110912898	CD19.CD20_REG9507	+	Chr4	110719771	111119771	ELOVL6	-	4.54375	0.705496	0.256235	2.00083		0	1
1	Chr19	45593796	45623445	CD19.CD20_REG6349	+	Chr19	45527177	45927177	ERCC1	-	2.25775	0.100208	-0.63501	-1.50051		1	0
1	Chr19	16985948	16989948	PEAKM_Runx1_SEChr19-26	+	Chr19	16599824	16999824	F2RL3	+	1.15013	0.799792	-1.62983	-1.72474		1	0
2	Chr19	16984186	16987420	CD19.CD20_REG6160	+	Chr19	16599824	16999824	F2RL3	+	1.22919	0.712088	-1.62983	-2.20491		1	0
1	Chr11	61581654	61585626	CD34_REG2678	+	Chr11	61195711	61595711	FADS2	+	0.443234	0.769523	-0.337387	-0.649481		1	0
2	Chr11	61728565	61740918	CD19.CD20_REG2129	+	Chr11	61595712	61995712	FADS2	+	1.65196	0.481231	-0.337387	-1.42921		1	0
1	Chr10	15182420	15184387	CD19.CD20_REG1388	+	Chr10	14816897	15216897	FAM107B	-	1.27523	0.0104915	0.49318	0.978836		0	1
1	Chr6	35330570	35331303	CD34_REG13166	+	Chr6	35256719	35656719	FKBP5	-	1.44638	0.034092	-0.351318	-1.26495		1	0
1	Chr9	132645457	132665595	CD19.CD20_REG12829	+	Chr9	132405473	132805473	FNBP1	-	0.811443	0.400816	-0.533597	-0.951306		1	0
1	Chr9	130537919	130550856	CD19.CD20_REG12799	+	Chr9	130165506	130565506	FPGS	+	0.61669	0.465522	-0.576841	-0.766396		1	0
2	Chr9	130614881	130629494	CD19.CD20_REG12802	+	Chr9	130565507	130965507	FPGS	+	0.693684	0.569339	-0.576841	-0.931187		1	0
3	Chr9	130622343	130628156	CD34_REG15914	+	Chr9	130565507	130965507	FPGS	+	0.810493	0.442456	-0.576841	-0.979152		1	0
4	Chr9	130622658	130626658	CD34_Runx1_PEAKChr9-34	+	Chr9	130565507	130965507	FPGS	+	1.09858	0.307825	-0.576841	-1.07231		1	0
5	Chr9	130557392	130561392	PEAKM_Runx1_SEChr9-24	+	Chr9	130165506	130565506	FPGS	+	1.10426	0.41972	-0.576841	-1.05844		1	0
6	Chr9	130557887	130560101	CD19.CD20_REG12801	+	Chr9	130165506	130565506	FPGS	+	1.21044	0.385374	-0.576841	-0.981097		1	0
7	Chr9	130558456	130559827	CD34_REG15912	+	Chr9	130165506	130565506	FPGS	+	1.2186	0.434616	-0.576841	-1.09063		1	0
1	Chr3	81521416	81535487	CD34_REG10541	+	Chr3	81410950	81810950	GBE1	-	0.729814	0.968773	0.597382	1.16172		0	1
1	Chr19	45593796	45623445	CD19.CD20_REG6349	+	Chr19	45582529	45982529	GEMIN7	+	1.62635	0.816569	-0.452645	-1.50051		1	0
1	Chr19	39921023	39943620	CD19.CD20_REG6291	+	Chr19	39826727	40226727	GMFG	-	1.71357	0.201828	-0.404717	0.456439		0	1
1	Chr7	1067028	1095899	CD34_REG13827	+	Chr7	726441	1126441	GPER1	+	1.19079	0.676507	-0.589967	-0.7676		1	0
1	Chr7	1067028	1095899	CD34_REG13827	+	Chr7	697139	1097139	GPR146	+	0.356646	0.956131	-0.932478	-0.7676		1	0
1	ChrX	78417991	78421882	CD34_REG16297	+	ChrX	78026467	78426467	GPR174	+	1.33721	0.822434	1.55466	0.842954		0	1
2	ChrX	78387887	78438883	CD19.CD20_SE1061	+	ChrX	78026467	78426467	GPR174	+	1.59242	0.938187	1.55466	0.806823	1	0	1
3	ChrX	78394708	78417991	CD34_SE794	+	ChrX	78026467	78426467	GPR174	+	1.64742	0.969961	1.55466	0.810369	1	0	1
1	Chr9	138883616	138885322	CD19.CD20_REG12864	+	Chr9	138849250	139249250	GPSM1	+	0.684077	0.948961	0.966213	1.05096		0	1
1	Chr17	19208914	19210910	CD19.CD20_REG5170	+	Chr17	18950337	19350337	GRAP	-	6.75808	0.674406	0.599656	3.75213		0	1
1	Chr17	19208914	19210910	CD19.CD20_REG5170	+	Chr17	19030781	19430781	GRAPL	+	6.51311	0.705997	0.794795	3.75213		0	1
1	Chr1	46010576	46011391	CD34_REG468	+	Chr1	45792544	46192544	HPDL	+	1.1149	0.350625	-0.647192	-1.29357		1	0
2	Chr17	14508254	14508989	CD19.CD20_REG5134	+	Chr17	14204505	14604505	HS3ST3B1	+	3.36175	0.901862	0.536479	2.08131		0	1
3	Chr17	14507592	14509201	CD34_REG6219	+	Chr17	14204505	14604505	HS3ST3B1	+	3.71533	0.873702	0.536479	2.18217		0	1
1	Chr19	16393786	16395326	CD34_REG7413	+	Chr19	16244837	16644837	HSH2D	+	1.63241	0.0828451	-0.677653	-1.51893		1	0
2	Chr19	16393818	16395649	CD19.CD20_REG6152	+	Chr19	16244837	16644837	HSH2D	+	1.69431	0.0585151	-0.677653	-1.5332		1	0
1	Chr19	10379718	10385073	CD19.CD20_REG6076	+	Chr19	9981515	10381515	ICAM1	+	0.478187	0.934781	0.721764	0.84376		0	1
2	Chr19	10345791	10348123	CD19.CD20_REG6075	+	Chr19	9981515	10381515	ICAM1	+	2.19674	0.992778	0.721764	1.6415		0	1
3	Chr19	10346470	10347604	CD34_REG7320	+	Chr19	9981515	10381515	ICAM1	+	3.09933	0.91777	0.721764	2.06116		0	1
4	Chr19	10396996	10416745	CD34_REG7321	+	Chr19	10381516	10781516	ICAM1	+	4.02256	0.567285	0.721764	2.25367		0	1
1	Chr19	10379718	10385073	CD19.CD20_REG6076	+	Chr19	9997641	10397641	ICAM4	+	0.514958	0.958459	0.915879	0.84376		0	1
2	Chr19	10345791	10348123	CD19.CD20_REG6075	+	Chr19	9997641	10397641	ICAM4	+	2.19457	0.946095	0.998758	1.6415		0	1
3	Chr19	10346470	10347604	CD34_REG7320	+	Chr19	9997641	10397641	ICAM4	+	3.09085	0.852217	0.998758	2.06116		0	1
4	Chr19	10396996	10416745	CD34_REG7321	+	Chr19	9997641	10397641	ICAM4	+	4.06341	0.437259	0.998758	2.25367		0	1
1	Chr1	23874719	23963334	CD19.CD20_SE25	+	Chr1	23486285	23886285	ID3	-	0.932558	0.977211	-0.706984	-0.51601	1	1	0
1	Chr1	158973949	159060041	CD19.CD20_SE76	+	Chr1	158579680	158979680	IFI16	+	1.3872	0.507236	0.630585	0.912027	1	0	1
2	Chr1	158978228	158988544	CD34_REG1069	+	Chr1	158579680	158979680	IFI16	+	1.41593	0.544237	0.630585	0.970147		0	1
1	Chr22	23907374	23934869	CD34_REG9790	+	Chr22	23522495	23922495	IGLL1	-	0.808231	0.965389	-1.03901	-0.75771		1	0
2	Chr22	23920635	23924635	PEAKM_Runx1_SEChr22-15	+	Chr22	23522495	23922495	IGLL1	-	0.894538	0.840578	-1.03901	-0.932495		1	0
1	Chr8	41997182	42001182	CD34_Runx1_PEAKChr8-34	+	Chr8	41728818	42128818	IKBKB	+	1.25136	0.445101	0.291774	0.855731		0	1
2	Chr8	41996283	42002252	CD34_SE738	+	Chr8	41728818	42128818	IKBKB	+	1.33618	0.445849	0.291774	0.860175	1	0	1
1	Chr16	27183598	27187598	CD34_Runx1_PEAKChr16-45	+	Chr16	27038577	27438577	IL21R	+	1.29664	0.777614	-0.553045	-1.72654		1	0
2	Chr16	27183917	27186295	CD19.CD20_REG4661	+	Chr16	27038577	27438577	IL21R	+	1.55365	0.817872	-0.553045	-1.86747		1	0
1	Chr2	182319511	182323511	PEAKM_Runx1_SEChr2-14	+	Chr2	181921617	182321617	ITGA4	+	0.416781	0.864544	-0.566483	-0.765742		1	0
2	Chr2	182311067	182351892	CD19.CD20_SE597	+	Chr2	181921617	182321617	ITGA4	+	0.427987	0.917786	-0.566483	-0.610959	1	1	0
3	Chr2	182311452	182351873	CD34_SE453	+	Chr2	181921617	182321617	ITGA4	+	0.43176	0.917787	-0.566483	-0.608771	1	1	0
1	Chr10	102819873	102825269	CD34_REG2187	+	Chr10	102420997	102820997	KAZALD1	+	0.784094	0.973887	-1.18861	-0.871771		1	0
2	Chr10	102819256	102823256	CD34_Runx1_PEAKChr10-36	+	Chr10	102420997	102820997	KAZALD1	+	0.983381	0.967645	-1.18861	-0.767845		1	0
1	Chr11	2404564	2408564	PEAKM_Runx1_SEChr11-48	+	Chr11	2321228	2721228	KCNQ1OT1	-	2.77742	0.323444	0.636522	-1.36561		1	0
2	Chr11	2403955	2424018	CD34_REG2372	+	Chr11	2321228	2721228	KCNQ1OT1	-	2.77768	0.318339	0.636522	-1.25148		1	0
3	Chr11	2398605	2423259	CD19.CD20_REG1905	+	Chr11	2321228	2721228	KCNQ1OT1	-	2.78122	0.343001	0.636522	-1.28436		1	0
1	Chr13	46907449	46979681	CD19.CD20_SE287	+	Chr13	46561635	46961635	KIAA0226L	-	0.503527	0.960498	1.05472	0.997394	1	0	1
2	Chr13	46869218	46870950	CD34_REG4189	+	Chr13	46561635	46961635	KIAA0226L	-	2.3035	0.762908	1.05472	1.30705		0	1
1	Chr19	1646125	1670557	CD19.CD20_REG5964	+	Chr19	1463564	1863564	KLF16	-	0.574836	0.383274	-0.480357	-0.502455		1	0
1	Chr19	54837694	54901930	CD19.CD20_REG6455	+	Chr19	54476721	54876721	LAIR1	-	0.478051	0.895982	-0.648945	-0.825127		1	0
2	Chr19	54872606	54899864	CD34_REG7774	+	Chr19	54476721	54876721	LAIR1	-	0.56462	0.879293	-0.648945	-0.989445		1	0
1	Chr19	54837694	54901930	CD19.CD20_REG6455	+	Chr19	54614011	55014011	LAIR2	+	0.509385	0.878586	-0.719895	-0.825127		1	0
2	Chr19	54872606	54899864	CD34_REG7774	+	Chr19	54614011	55014011	LAIR2	+	0.593128	0.863295	-0.719895	-0.989445		1	0
1	Chr7	73622786	73656930	CD19.CD20_REG11501	+	Chr7	73224085	73624085	LAT2	+	0.888522	0.990884	-1.69102	-0.90972		1	0
1	Chr1	4103871	4106555	CD19.CD20_REG37	+	Chr1	3816967	4216967	LINC01134	+	1.1134	0.916763	-0.800682	-1.05497		1	0
1	Chr10	22628764	22630642	CD34_REG1807	+	Chr10	22326858	22726858	LOC100499489	-	0.294229	0.97016	-0.767616	-0.834458		1	0
2	Chr10	22601862	22615595	CD34_REG1806	+	Chr10	22326858	22726858	LOC100499489	-	0.374597	0.863146	-0.767616	-0.656013		1	0
3	Chr10	22603553	22630733	CD19.CD20_REG1400	+	Chr10	22326858	22726858	LOC100499489	-	0.414315	0.871709	-0.767616	-0.664599		1	0
4	Chr10	22723907	22729224	CD19.CD20_REG1401	+	Chr10	22326858	22726858	LOC100499489	-	0.515655	0.950618	-0.767616	-0.522579		1	0
1	Chr12	9788063	9838708	CD19.CD20_SE231	+	Chr12	9400641	9800641	LOC374443	+	0.857071	0.764191	-0.604282	-0.630416	1	1	0
2	Chr12	9799567	9804966	CD34_REG3234	+	Chr12	9400641	9800641	LOC374443	+	0.868355	0.76451	-0.604282	-0.81254		1	0
3	Chr12	9915518	9919518	CD34_Runx1_PEAKChr12-32	+	Chr12	9800642	10200642	LOC374443	+	2.77344	0.563409	-0.604282	0.976595		0	1
4	Chr12	9883456	9918776	CD34_SE198	+	Chr12	9800642	10200642	LOC374443	+	3.04152	0.819988	-0.604282	0.960509	1	0	1
1	Chr9	140214978	140221972	CD34_REG16026	+	Chr9	140064492	140464492	LRRC26	-	3.5527	0.561787	-0.720249	1.2298		0	1
1	Chr3	152312888	152315339	CD19.CD20_REG8978	+	Chr3	151985828	152385828	MBNL1	+	2.28143	0.825275	0.691423	1.53667		0	1
2	Chr3	151909494	152052131	CD34_SE550	+	Chr3	151585827	151985827	MBNL1	+	2.32233	0.961755	0.691423	2.09412	1	0	1
3	Chr3	151957108	152004127	CD19.CD20_REG8968	+	Chr3	151617192	152017192	MBNL1	+	2.34065	0.95484	0.661961	2.0328		0	1
4	Chr3	151909494	152052131	CD34_SE550	+	Chr3	151617192	152017192	MBNL1	+	2.35075	0.952489	0.661961	2.09412	1	0	1
1	Chr10	74053419	74059601	CD19.CD20_REG1581	+	Chr10	74051887	74451887	MCU	+	1.10483	0.741635	0.311655	-0.547158		1	0
2	Chr10	74055191	74059191	PEAKM_Runx1_SEChr10-10	+	Chr10	74051887	74451887	MCU	+	1.1342	0.727026	0.311655	-0.562233		1	0
3	Chr10	74055187	74059187	CD34_Runx1_PEAKChr10-35	+	Chr10	74051887	74451887	MCU	+	1.1342	0.727026	0.311655	-0.562233		1	0
1	Chr17	17629398	17677244	CD34_SE334	+	Chr17	17380299	17780299	MED9	+	0.49995	0.611104	-0.378079	-0.634392	1	1	0
2	Chr17	17640452	17671000	CD19.CD20_REG5154	+	Chr17	17380299	17780299	MED9	+	0.505891	0.604984	-0.378079	-0.626207		1	0
1	Chr2	208393366	208400411	CD34_REG8918	+	Chr2	208089973	208489973	METTL21A	-	1.21059	0.286387	-0.499531	-0.899642		1	0
1	Chr6	31617938	31622093	CD19.CD20_REG10584	+	Chr6	31371370	31771370	MICA	+	2.09176	0.382507	-0.477021	-1.82794		1	0
1	Chr6	109767238	109789639	CD19.CD20_SE901	+	Chr6	109377190	109777190	MICAL1	-	0.593176	0.987764	-0.809381	-0.761176	1	1	0
1	Chr10	21821453	21825153	CD19.CD20_REG1395	+	Chr10	21423572	21823572	MLLT10	+	0.494371	0.883541	-0.451926	-0.511931		1	0
2	Chr10	21807558	21824843	CD34_SE116	+	Chr10	21423572	21823572	MLLT10	+	0.68857	0.839706	-0.451926	-0.440949	1	1	0
1	Chr16	89022017	89051526	CD19.CD20_REG4967	+	Chr16	88729496	89129496	MVD	-	0.506897	0.911991	-0.560325	-0.75478		1	0
1	Chr17	27438109	27442109	PEAKM_Runx1_SEChr17-15	+	Chr17	27107407	27507407	MYO18A	-	2.19019	0.453954	-0.309334	-1.99046		1	0
1	Chr5	139119508	139128997	CD19.CD20_REG10127	+	Chr5	138725606	139125606	MZB1	-	0.951263	0.812457	-0.417909	-0.654421		1	0
2	Chr5	139047785	139051785	PEAKM_Runx1_SEChr5-44	+	Chr5	138725606	139125606	MZB1	-	1.41908	0.673041	-0.417909	-0.971743		1	0
1	Chr5	177539336	177548357	CD19.CD20_REG10310	+	Chr5	177140554	177540554	N4BP3	+	0.504347	0.973412	-1.10156	-1.02573		1	0
2	Chr5	177869462	177877519	CD34_REG12751	+	Chr5	177540555	177940555	N4BP3	+	1.01872	0.465931	-1.10156	-1.13071		1	0
1	Chr5	35853533	35855563	CD19.CD20_REG9743	+	Chr5	35842258	36242258	NADK2	-	0.673307	0.620781	0.476992	0.976417		0	1
1	Chr14	75590124	75609954	CD19.CD20_REG3848	+	Chr14	75193778	75593778	NEK9	-	0.262217	0.908604	0.361775	0.578193		0	1
1	Chr6	138714916	138716148	CD19.CD20_REG11013	+	Chr6	138420579	138820579	NHSL1	-	1.41928	0.995648	0.83303	1.71072		0	1
1	Chr15	41231707	41233432	CD19.CD20_REG4098	+	Chr15	41224890	41624890	NUSAP1	+	1.82988	0.39014	-0.360699	-1.92181		1	0
1	Chr1	241691454	241717242	CD19.CD20_REG1232	+	Chr1	241403701	241803701	OPN3	-	1.35884	0.897805	0.413258	1.03656		0	1
2	Chr1	241714191	241716122	CD34_REG1578	+	Chr1	241403701	241803701	OPN3	-	1.81212	0.818108	0.413258	1.16262		0	1
1	Chr10	72235450	72269782	CD19.CD20_REG1565	+	Chr10	71838562	72238562	PALD1	+	0.578557	0.805677	-0.640217	-1.1628		1	0
1	Chr2	114147408	114148373	CD34_REG8466	+	Chr2	113993845	114393845	PAX8-AS1	+	3.77427	0.779846	0.33258	2.81486		0	1
1	Chr3	34238492	34245312	CD19.CD20_REG8474	+	Chr3	33870129	34270129	PDCD6IP	+	2.59369	0.740424	0.336129	1.0937		0	1
1	Chr1	66781920	66816782	CD34_REG610	+	Chr1	66397791	66797791	PDE4B	+	0.392332	0.779799	0.51126	0.682871		0	1
2	Chr1	66793771	66869333	CD19.CD20_SE51	+	Chr1	66397791	66797791	PDE4B	+	0.947602	0.938461	0.51126	0.989215	1	0	1
1	Chr17	17305312	17309312	CD34_Runx1_PEAKChr17-9	+	Chr17	17109647	17509647	PLD6	-	1.67406	0.439816	-0.627068	-1.36353		1	0
2	Chr17	17306141	17308698	CD19.CD20_REG5151	+	Chr17	17109647	17509647	PLD6	-	1.70802	0.333655	-0.627068	-1.37462		1	0
1	Chr11	111471702	111475469	CD19.CD20_REG2409	+	Chr11	111250158	111650158	POU2AF1	-	1.39754	0.780981	0.524924	1.44249		0	1
1	Chr11	67166364	67189211	CD19.CD20_REG2220	+	Chr11	66769376	67169376	PPP1CA	-	0.475212	0.856122	-0.994784	-1.07111		1	0
2	Chr11	67024921	67056775	CD34_SE172	+	Chr11	66769376	67169376	PPP1CA	-	0.526775	0.826958	-0.994784	-0.619322	1	1	0
3	Chr11	67005459	67058329	CD19.CD20_SE198	+	Chr11	66769376	67169376	PPP1CA	-	0.549286	0.847389	-0.994784	-0.596193	1	1	0
4	Chr11	67164328	67177921	CD34_REG2792	+	Chr11	66769376	67169376	PPP1CA	-	0.915741	0.857308	-0.994786	-1.61076		1	0
5	Chr11	67043094	67047094	CD34_Runx1_PEAKChr11-55	+	Chr11	66769376	67169376	PPP1CA	-	1.05059	0.853344	-0.994784	-0.843993		1	0
6	Chr11	67037404	67041404	PEAKM_Runx1_SEChr11-13	+	Chr11	66769376	67169376	PPP1CA	-	1.34817	0.686542	-0.994784	-1.46657		1	0
1	Chr19	45593796	45623445	CD19.CD20_REG6349	+	Chr19	45196429	45596429	PPP1R37	+	1.76346	0.703867	-0.313515	-1.50051		1	0
1	Chr8	22297320	22306066	CD34_REG14828	+	Chr8	21898481	22298481	PPP3CC	+	0.672032	0.31689	-0.325119	-0.611605		1	0
2	Chr8	22561937	22563125	CD34_REG14831	+	Chr8	22298482	22698482	PPP3CC	+	0.937936	0.644299	-0.325119	-1.09866		1	0
3	Chr8	22560640	22564640	CD34_Runx1_PEAKChr8-1	+	Chr8	22298482	22698482	PPP3CC	+	1.03818	0.646513	-0.325119	-1.16656		1	0
4	Chr8	22560633	22564633	PEAKM_Runx1_SEChr8-17	+	Chr8	22298482	22698482	PPP3CC	+	1.03819	0.646517	-0.325119	-1.16657		1	0
1	Chr1	46010576	46011391	CD34_REG468	+	Chr1	45988563	46388563	PRDX1	-	1.18134	0.219661	-0.337321	-1.29357		1	0
1	Chr19	47217356	47234958	CD34_REG7666	+	Chr19	46817577	47217577	PRKD2	-	1.11088	0.992027	-0.331188	-1.23408		1	0
2	Chr19	47219770	47223770	PEAKM_Runx1_SEChr19-41	+	Chr19	47217578	47617578	PRKD2	-	1.39149	0.997891	-0.331188	-1.48697		1	0
1	Chr14	52641352	52644314	CD19.CD20_REG3703	+	Chr14	52334429	52734429	PTGDR	+	1.32492	0.880724	0.656313	0.696482		0	1
1	Chr11	67166364	67189211	CD19.CD20_REG2220	+	Chr11	66805153	67205153	PTPRCAP	-	0.370944	0.983993	-1.37685	-1.07111		1	0
2	Chr11	67164328	67177921	CD34_REG2792	+	Chr11	66805153	67205153	PTPRCAP	-	0.411469	0.990933	-1.37685	-1.61076		1	0
3	Chr11	67024921	67056775	CD34_SE172	+	Chr11	66805153	67205153	PTPRCAP	-	0.884354	0.84183	-1.37685	-0.619322	1	1	0
4	Chr11	67005459	67058329	CD19.CD20_SE198	+	Chr11	66805153	67205153	PTPRCAP	-	0.907407	0.871551	-1.37685	-0.596193	1	1	0
5	Chr11	67043094	67047094	CD34_Runx1_PEAKChr11-55	+	Chr11	66805153	67205153	PTPRCAP	-	1.09607	0.975427	-1.37685	-0.843993		1	0
6	Chr11	67037404	67041404	PEAKM_Runx1_SEChr11-13	+	Chr11	66805153	67205153	PTPRCAP	-	1.23589	0.676075	-1.37685	-1.46657		1	0
1	Chr17	17305312	17309312	CD34_Runx1_PEAKChr17-9	+	Chr17	16999709	17399709	RASD1	-	0.86746	0.708407	-1.48128	-1.36353		1	0
2	Chr17	17306141	17308698	CD19.CD20_REG5151	+	Chr17	16999709	17399709	RASD1	-	0.879046	0.73909	-1.48128	-1.37462		1	0
3	Chr17	17629398	17677244	CD34_SE334	+	Chr17	17399710	17799710	RASD1	-	1.20448	0.0369041	-1.47808	-0.634392	1	1	0
4	Chr17	17640452	17671000	CD19.CD20_REG5154	+	Chr17	17399710	17799710	RASD1	-	1.20841	0.012748	-1.48128	-0.626207		1	0
1	Chr11	64510711	64514711	CD34_Runx1_PEAKChr11-34	+	Chr11	64111630	64511630	RASGRP2	-	0.167312	0.996636	-1.59334	-1.47455		1	0
2	Chr11	64508022	64515499	CD19.CD20_REG2169	+	Chr11	64112329	64512329	RASGRP2	-	0.328016	0.987113	-1.60646	-1.30617		1	0
3	Chr11	64615312	64656182	CD19.CD20_SE192	+	Chr11	64511631	64911631	RASGRP2	-	0.836873	0.891612	-1.59334	-0.818194	1	1	0
4	Chr11	64643046	64647046	PEAKM_Runx1_SEChr11-34	+	Chr11	64512929	64912929	RASGRP2	-	0.865183	0.860743	-1.64908	-0.918026		1	0
5	Chr11	64610019	64656808	CD34_REG2733	+	Chr11	64511631	64911631	RASGRP2	-	0.867798	0.897389	-1.59334	-0.786092		1	0
1	Chr7	73622786	73656930	CD19.CD20_REG11501	+	Chr7	73268738	73668738	RFC2	-	0.760634	0.444886	-0.38509	-0.90972		1	0
1	Chr1	182226342	182229900	CD34_REG1223	+	Chr1	182173548	182573548	RGS16	-	1.07432	0.562244	0.408643	0.942055		0	1
1	Chr20	62506269	62510269	PEAKM_Runx1_SEChr20-23	+	Chr20	62310845	62710845	RGS19	-	1.84543	0.622261	-1.06409	-1.97114		1	0
1	Chr5	177539336	177548357	CD19.CD20_REG10310	+	Chr5	177158026	177558026	RMND5B	+	0.531987	0.905192	-1.16455	-1.02573		1	0
2	Chr5	177869462	177877519	CD34_REG12751	+	Chr5	177558027	177958027	RMND5B	+	0.565647	0.887976	-1.16455	-1.13071		1	0
1	Chr11	64643046	64647046	PEAKM_Runx1_SEChr11-34	+	Chr11	64408374	64808374	SAC3D1	+	0.39407	0.852713	-0.795105	-0.918026		1	0
2	Chr11	64610019	64656808	CD34_REG2733	+	Chr11	64408374	64808374	SAC3D1	+	0.516552	0.705688	-0.795105	-0.786092		1	0
3	Chr11	64615312	64656182	CD19.CD20_SE192	+	Chr11	64408374	64808374	SAC3D1	+	0.530206	0.689703	-0.795105	-0.818194	1	1	0
4	Chr11	64508022	64515499	CD19.CD20_REG2169	+	Chr11	64408374	64808374	SAC3D1	+	0.99569	0.425971	-0.795105	-1.30617		1	0
5	Chr11	64510711	64514711	CD34_Runx1_PEAKChr11-34	+	Chr11	64408374	64808374	SAC3D1	+	1.09133	0.444526	-0.795105	-1.47455		1	0
1	Chr9	140214978	140221972	CD34_REG16026	+	Chr9	139965029	140365029	SAPCD2	-	3.52661	0.246295	-1.30453	1.2298		0	1
1	ChrX	23970400	23972276	CD34_REG16118	+	ChrX	23801274	24201274	SAT1	+	3.22141	0.455283	0.77357	2.0858		0	1
2	ChrX	23970355	23972824	CD19.CD20_REG13010	+	ChrX	23801274	24201274	SAT1	+	3.23817	0.459852	0.77357	2.11198		0	1
1	Chr5	543149	545265	CD19.CD20_REG9670	+	Chr5	218355	618355	SDHA	+	1.61495	0.5705	0.328963	1.33236		0	1
1	Chr17	75436590	75463001	CD34_REG6779	+	Chr17	75369271	75769271	SEPT9	+	0.587223	0.895334	-0.486689	-0.798926		1	0
2	Chr17	75368231	75492270	CD19.CD20_SE456	+	Chr17	74969270	75369270	SEPT9	+	0.760075	0.862324	-0.486689	-0.846134	1	1	0
3	Chr17	75435552	75439552	PEAKM_Runx1_SEChr17-41	+	Chr17	75372164	75772164	SEPT9	+	1.2402	0.57683	-0.489234	-1.10165		1	0
4	Chr17	75400153	75404153	PEAKM_Runx1_SEChr17-37	+	Chr17	75369271	75769271	SEPT9	+	2.46379	0.847982	-0.486689	-1.45993		1	0
5	Chr17	75605734	75606483	CD34_REG6781	+	Chr17	75372164	75772164	SEPT9	+	3.11213	0.962526	-0.489234	-2.84527		1	0
1	Chr9	130622658	130626658	CD34_Runx1_PEAKChr9-34	+	Chr9	130541049	130941049	SH2D3C	-	1.00201	0.432305	-1.353	-1.07231		1	0
2	Chr9	130614881	130629494	CD19.CD20_REG12802	+	Chr9	130533649	130933649	SH2D3C	-	1.02641	0.577195	-1.24202	-0.931187		1	0
3	Chr9	130622343	130628156	CD34_REG15914	+	Chr9	130533649	130933649	SH2D3C	-	1.28361	0.449802	-1.24202	-0.979152		1	0
4	Chr9	130537919	130550856	CD19.CD20_REG12799	+	Chr9	130533649	130933649	SH2D3C	-	1.72172	0.218692	-1.24202	-0.766396		1	0
5	Chr9	130557392	130561392	PEAKM_Runx1_SEChr9-24	+	Chr9	130533649	130933649	SH2D3C	-	1.98375	0.214793	-1.24202	-1.05844		1	0
6	Chr9	130558456	130559827	CD34_REG15912	+	Chr9	130533649	130933649	SH2D3C	-	2.14082	0.242585	-1.24202	-1.09063		1	0
7	Chr9	130557887	130560101	CD19.CD20_REG12801	+	Chr9	130533649	130933649	SH2D3C	-	2.19986	0.17299	-1.24202	-0.981097		1	0
1	Chr11	111471702	111475469	CD19.CD20_REG2409	+	Chr11	111073168	111473168	SIK2	+	1.31314	0.652749	0.695278	1.44249		0	1
1	Chr10	21821453	21825153	CD19.CD20_REG1395	+	Chr10	21814612	22214612	SKIDA1	-	0.881866	0.827977	-0.618188	-0.511931		1	0
2	Chr10	21807558	21824843	CD34_SE116	+	Chr10	21414611	21814611	SKIDA1	-	1.10016	0.782335	-0.618188	-0.440949	1	1	0
1	Chr11	746423	749459	CD19.CD20_REG1887	+	Chr11	398269	798269	SLC25A22	-	1.06536	0.0868372	-0.533176	-1.06614		1	0
1	Chr8	121873134	121874022	CD34_REG15268	+	Chr8	121824310	122224310	SNTB1	-	2.64134	0.88542	0.698732	2.17779		0	1
1	Chr2	65662506	65665093	CD34_REG8230	+	Chr2	65659657	66059657	SPRED2	-	0.494702	0.759134	0.442439	0.666572		0	1
1	Chr17	17629398	17677244	CD34_SE334	+	Chr17	17340325	17740325	SREBF1	-	0.812669	0.749031	-0.343003	-0.634392	1	1	0
2	Chr17	17640452	17671000	CD19.CD20_REG5154	+	Chr17	17340325	17740325	SREBF1	-	0.814524	0.751441	-0.343003	-0.626207		1	0
1	Chr9	130537919	130550856	CD19.CD20_REG12799	+	Chr9	130279305	130679305	ST6GALNAC4	-	0.739765	0.256724	-0.55492	-0.766396		1	0
2	Chr9	130614881	130629494	CD19.CD20_REG12802	+	Chr9	130279305	130679305	ST6GALNAC4	-	0.976882	0.2113	-0.55492	-0.931187		1	0
3	Chr9	130622343	130628156	CD34_REG15914	+	Chr9	130279305	130679305	ST6GALNAC4	-	1.07722	0.0779546	-0.55492	-0.979152		1	0
4	Chr9	130557392	130561392	PEAKM_Runx1_SEChr9-24	+	Chr9	130279305	130679305	ST6GALNAC4	-	1.22916	0.145197	-0.55492	-1.05844		1	0
5	Chr9	130557887	130560101	CD19.CD20_REG12801	+	Chr9	130279305	130679305	ST6GALNAC4	-	1.29125	0.129503	-0.55492	-0.981097		1	0
6	Chr9	130558456	130559827	CD34_REG15912	+	Chr9	130279305	130679305	ST6GALNAC4	-	1.30835	0.17214	-0.55492	-1.09063		1	0
1	Chr22	39146772	39153475	CD34_REG9924	+	Chr22	38751467	39151467	SUN2	-	0.145576	0.9839	-0.541595	-0.647655		1	0
1	Chr4	16271555	16272674	CD34_REG11266	+	Chr4	16228162	16628162	TAPT1	-	2.12196	0.660581	0.317941	1.288		0	1
1	Chr11	67037404	67041404	PEAKM_Runx1_SEChr11-13	+	Chr11	66771382	67171382	TBC1D10C	+	1.59235	0.978101	-2.457	-1.46657		1	0
2	Chr11	67164328	67177921	CD34_REG2792	+	Chr11	66771382	67171382	TBC1D10C	+	2.21978	0.752346	-2.457	-1.61076		1	0
3	Chr11	67166364	67189211	CD19.CD20_REG2220	+	Chr11	66771382	67171382	TBC1D10C	+	2.76717	0.771467	-2.457	-1.07111		1	0
4	Chr11	67024921	67056775	CD34_SE172	+	Chr11	66771382	67171382	TBC1D10C	+	3.04042	0.963739	-2.457	-0.619322	1	1	0
5	Chr11	67005459	67058329	CD19.CD20_SE198	+	Chr11	66771382	67171382	TBC1D10C	+	3.09989	0.95344	-2.457	-0.596193	1	1	0
6	Chr11	67043094	67047094	CD34_Runx1_PEAKChr11-55	+	Chr11	66771382	67171382	TBC1D10C	+	3.61132	0.525744	-2.457	-0.843993		1	0
1	Chr10	25303831	25308348	CD19.CD20_REG1408	+	Chr10	24905506	25305506	THNSL1	+	1.07884	0.789472	-1.00736	-1.1305		1	0
1	Chr9	82426815	82428749	CD19.CD20_REG12562	+	Chr9	82186877	82586877	TLE4	+	1.76825	0.157999	0.364852	0.715342		0	1
1	Chr6	138186095	138206009	CD19.CD20_SE907	+	Chr6	137788579	138188579	TNFAIP3	+	1.42687	0.38541	-0.650488	-0.559237	1	1	0
1	Chr17	38598833	38602271	CD19.CD20_REG5318	+	Chr17	38574203	38974203	TOP2A	-	2.81282	0.69914	-0.281817	-1.36922		1	0
1	Chr9	132645457	132665595	CD19.CD20_REG12829	+	Chr9	132565431	132965431	TOR1B	+	0.770799	0.433694	-0.438584	-0.951306		1	0
1	Chr19	16393786	16395326	CD34_REG7413	+	Chr19	16178316	16578316	TPM4	+	1.91967	0.315032	-0.463925	-1.51893		1	0
2	Chr19	16393818	16395649	CD19.CD20_REG6152	+	Chr19	16187134	16587134	TPM4	+	2.00252	0.244267	-0.467089	-1.5332		1	0
1	Chr11	122583810	122598756	CD19.CD20_REG2464	+	Chr11	122526397	122926397	UBASH3B	+	0.824691	0.951139	-0.415327	-0.567733		1	0
2	Chr11	122613466	122626806	CD34_REG3089	+	Chr11	122526397	122926397	UBASH3B	+	1.56687	0.957683	-0.415327	-1.09181		1	0
3	Chr11	122613704	122618025	CD19.CD20_REG2465	+	Chr11	122526397	122926397	UBASH3B	+	1.97254	0.82919	-0.415327	-1.44357		1	0
1	Chr3	23802517	23805177	CD19.CD20_REG8421	+	Chr3	23447382	23847382	UBE2E1	+	3.69091	0.242873	0.300553	2.39962		0	1
1	Chr5	35853533	35855563	CD19.CD20_REG9743	+	Chr5	35667023	36067023	UGT3A2	-	2.25777	0.509032	-0.539009	0.976417		0	1
1	Chr5	133330665	133341761	CD34_REG12502	+	Chr5	132940824	133340824	VDAC1	-	0.589511	0.89633	-0.506866	-0.680102		1	0
1	Chr3	11758920	11763490	CD19.CD20_REG8340	+	Chr3	11685399	12085399	VGLL4	-	1.06934	0.8704	0.323065	0.889912		0	1
1	Chr12	123344832	123387549	CD19.CD20_SE277	+	Chr12	122980712	123380712	VPS37B	-	0.672855	0.231838	-0.353835	-0.934504	1	1	0
1	Chr22	29186524	29198950	CD19.CD20_REG8100	+	Chr22	28796560	29196560	XBP1	-	1.00725	0.836974	-0.745212	-0.516594		1	0
2	Chr22	29175566	29220102	CD34_SE501	+	Chr22	28796560	29196560	XBP1	-	1.19176	0.599903	-0.745212	-0.493354	1	1	0
1	Chr10	31606574	31610410	CD34_REG1865	+	Chr10	31208024	31608024	ZEB1-AS1	-	0.794494	0.884882	-1.06605	-1.66357		1	0
2	Chr10	31605632	31611732	CD19.CD20_REG1437	+	Chr10	31208024	31608024	ZEB1-AS1	-	0.799585	0.886735	-1.06605	-1.66364		1	0
3	Chr10	31422177	31424146	CD19.CD20_REG1436	+	Chr10	31208024	31608024	ZEB1-AS1	-	0.871835	0.803543	-1.06605	-0.6102		1	0
1	Chr2	144993919	145000816	CD19.CD20_REG7123	+	Chr2	144877958	145277958	ZEB2	-	1.00044	0.945987	0.387648	1.2486		0	1
1	Chr19	53399424	53401457	CD34_REG7758	+	Chr19	53073525	53473525	ZNF701	+	3.76534	0.739156	-0.646043	-1.68921		1	0
2	Chr19	53399650	53401883	CD19.CD20_REG6441	+	Chr19	53073525	53473525	ZNF701	+	3.79201	0.816564	-0.646043	-1.78291		1	0
1	Chr7	149656872	149660425	CD19.CD20_REG11834	+	Chr7	149321882	149721882	ZNF767P	-	1.48278	0.0271605	0.251304	1.01631		0	1
															SUM	219	67
				190 unique regions					141 unique transcripts						42
															(28 unique SE-regions)	0.765734
