# Supplementary material for: Genome-wide repression of eRNA and target gene loci by the ETV6-RUNX1 fusion in acute leukemia
Source: HighWire-hosted journal article supplement (doi:10.1101/gr.193649.115), 2016-09-12
Supplement: Supplemental_Table_S3.xlsx [file Supplemental_Table_S3.xlsx]

## Sheet: Table S3. SE
Table S3.
CD19+/CD20+ E/R-regulated superenhancers						CD34+ E/R-regulated superenhancers
Chr	start	end	ID	E/R24h vs. LUC24h log2FC		Chr	start	end	ID	E/R24h vs. LUC24h log2FC
Chr19	50916608	50939712	CD19.CD20_SE530	-1.42197		Chr9	134129040	134153422	CD34_SE783	-0.90343
Chr5	133261845	133322474	CD19.CD20_SE824	-1.26298		Chr3	194860935	194925886	CD34_SE559	-0.881651
Chr9	134112569	134155283	CD19.CD20_SE1037	-1.16074		Chr17	43299278	43308281	CD34_SE348	-0.793557
Chr8	145000243	145027732	CD19.CD20_SE1007	-1.13446		Chr11	47378985	47423230	CD34_SE158	-0.76554
Chr12	123344832	123387549	CD19.CD20_SE277	-0.934504		Chr16	88147109	88155681	CD34_SE326	-0.717111
Chr22	50624423	50632603	CD19.CD20_SE690	-0.865719		Chr4	84021465	84037724	CD34_SE576	-0.703537
Chr17	75368231	75492270	CD19.CD20_SE456	-0.846134		Chr21	40350903	40378330	CD34_SE492	-0.689103
Chr11	64615312	64656182	CD19.CD20_SE192	-0.818194		Chr17	17629398	17677244	CD34_SE334	-0.634392
Chr12	108999014	109063191	CD19.CD20_SE270	-0.783461		Chr11	67024921	67056775	CD34_SE172	-0.619322
Chr6	109767238	109789639	CD19.CD20_SE901	-0.761176		Chr2	182311452	182351873	CD34_SE453	-0.608771
Chr17	3807098	3872953	CD19.CD20_SE408	-0.733252		Chr18	74800855	74846934	CD34_SE382	-0.584821
Chr6	41650128	41703851	CD19.CD20_SE884	-0.714495		Chr19	13249931	13293331	CD34_SE390	-0.548669
Chr19	7399111	7430093	CD19.CD20_SE486	-0.660831		Chr22	29175566	29220102	CD34_SE501	-0.493354
Chr14	62160579	62218877	CD19.CD20_SE311	-0.659836		Chr10	21807558	21824843	CD34_SE116	-0.440949
ChrX	128889294	128934409	CD19.CD20_SE1066	-0.637533		Chr6	119651470	119684605	CD34_SE680	0.581153
Chr12	9788063	9838708	CD19.CD20_SE231	-0.630416		Chr19	48746303	48763798	CD34_SE404	0.659435
Chr2	182311067	182351892	CD19.CD20_SE597	-0.610959		Chr12	29300482	29320008	CD34_SE209	0.779364
Chr11	67005459	67058329	CD19.CD20_SE198	-0.596193		ChrX	78394708	78417991	CD34_SE794	0.810369
Chr6	138186095	138206009	CD19.CD20_SE907	-0.559237		Chr8	41996283	42002252	CD34_SE738	0.860175
Chr19	13250006	13284995	CD19.CD20_SE495	-0.553097		Chr12	9883456	9918776	CD34_SE198	0.960509
Chr3	32431992	32559170	CD19.CD20_SE708	-0.533631		Chr1	198567121	198655203	CD34_SE89	1.65053
Chr14	105115799	105162782	CD19.CD20_SE338	-0.520554		Chr3	151909494	152052131	CD34_SE550	2.09412
Chr1	23874719	23963334	CD19.CD20_SE25	-0.51601							proportion
Chr8	22550746	22574756	CD19.CD20_SE973	-0.504832						14 downregulated	0.64
Chr14	107149840	107177851	CD19.CD20_SE345	-0.493246					22	8 upregulated	0.36
Chr11	73074643	73127803	CD19.CD20_SE203	0.511026
Chr2	114611623	114730851	CD19.CD20_SE579	0.524858
Chr6	91084014	91103503	CD19.CD20_SE898	0.589846
Chr12	75863566	75906607	CD19.CD20_SE260	0.69086
Chr10	98335589	98528465	CD19.CD20_SE155	0.754703
Chr9	37368989	37417066	CD19.CD20_SE1018	0.774393
ChrX	78387887	78438883	CD19.CD20_SE1061	0.806823
Chr1	158973949	159060041	CD19.CD20_SE76	0.912027
Chr1	66793771	66869333	CD19.CD20_SE51	0.989215
Chr13	46907449	46979681	CD19.CD20_SE287	0.997394
Chr1	198563513	198726078	CD19.CD20_SE98	2.14446
Chr7	99786621	99820750	CD19.CD20_SE948	2.21508
					proportion
				25 downregulated	0.68
			37	12 upregulated	0.32
