# Supplementary material for: Genome-wide repression of eRNA and target gene loci by the ETV6-RUNX1 fusion in acute leukemia
Source: HighWire-hosted journal article supplement (doi:10.1101/gr.193649.115), 2016-09-12
Supplement: Supplemental_Table_S4.xlsx [file Supplemental_Table_S4.xlsx]

## Sheet: Table S4. Sheet 1
Table S4. ETV6-RUNX1-regulated denovo transcripts.
Novel lncRNA: GRO-seq														RNA-seq analysis (see sheet 2 for count values)
Chr	Start	End	Strand	Name	Type	RUNX1-peak in SEM cells (GSE42075)	CD34+ K27ac	CD19+/20+ K27ac	CD34+ SE	CD19+/20+ SE	GRO-seq, E/R regulation	0	Genes nearby	name	baseMean	log2FoldChange	lfcSE	stat	pvalue	padj	padj < 0.05	Comparison of GRO-seq and RNA-seq	log2FC >0.5 OR log2FC < -0.5	Comparison of GRO-seq and RNA-seq
Chr1	15032883	15062431	-	E/R1	antisense	0	0	0	0	0	down		KAZN	E/R1	32.2268	0.0876073	0.57522	0.152302	0.878948	0.927906	0		0
Chr2	166439867	166445208	-	E/R2	antisense	0	0	0	0	0	up	lnc	CSRNP3	E/R2	1.73476	-0.138136	0.664491	-0.207882	0.835321	0.906025	0		0
Chr12	4550500	4572189	+	E/R3	antisense	1	0	0	0	0	down		FGF6	E/R3	1160.78	-2.47705	0.334711	-7.40056	1.35611e-13	6.93314e-12	1	both down	1	both down
Chr12	7100107	7144241	+	E/R4	antisense	1	0	0	0	0	up		LPCAT3	E/R4	217.877	-0.560916	0.272228	-2.06047	0.0393538	0.118351	0		1	different
Chr19	55517544	55529323	+	E/R5	antisense	0	1	1	0	0	up		GP6, RDH13	E/R5	1193.19	0.513423	0.556012	0.923402	0.355798	0.559697	0		1	both up
Chr19	20293947	20349299	-	E/R6	antisense	0	0	0	0	0	down		ZNF486	E/R6	102.899	0.25884	0.376066	0.688284	0.491274	0.645539	0		0
Chr4	77858835	77870880	-	E/R7	antisense (pat)	1	0	0	0	0	down		SEPT11	E/R7	388.588	-0.927469	0.299875	-3.09285	0.00198247	0.0114201	1	both down	1	both down
Chr4	89508099	89513482	-	E/R8	antisense (pat)	1	0	0	0	0	up	may be enhancer	HERC3	E/R8	17.1779	-0.386804	0.377964	-1.02339	0.306125	0.504549	0		0
Chr10	102800155	102823483	-	E/R9	antisense (pat)	1	1	1	0	0	down		KAZALD1	E/R9	75.8709	-0.244325	0.391021	-0.624838	0.532077	0.673745	0		0
Chr11	269399	280190	-	E/R10	antisense (pat)	1	1	1	0	0	down		NLRP6. ATHL1, SIRT3, IFITM, PSMD13	E/R10	32.8929	-0.477766	0.430917	-1.10872	0.267552	0.464202	0		0
Chr22	43253418	43259971	+	E/R11	antisense (pat)	1	0	1	0	0	up	lnc	ARFGAP3	E/R11	15.5807	0.990908	0.458285	2.16221	0.0306019	0.0955434	0		1	both up
ChrY	2794539	2803932	-	E/R12	antisense (pat)	0	0	0	0	0	up	lnc	ZFY as, RPS4Y1	E/R12	25.4009	-0.668075	0.488739	-1.36694	0.171645	0.354201	0		1	different
Chr22	23913120	23923283	+	E/R13	antisense/SE	1	1	0	0	0	down		IGLL1	E/R13	9.98731	-0.179952	0.368506	-0.488329	0.625317	0.750013	0		0
Chr22	48974148	48987235	-	E/R14	antisense/SE	0	0	0	0	0	down		FAM19A5	E/R14	7.3448	1.3919	0.417136	3.3368	0.000847501	0.00597634	1	different	1	different
Chr6	32867058	32873446	+	E/R15	LOC100294145 region	0	0	0	0	0	up	lnc - strong	LOC100294145	E/R15	415.741	-0.265091	0.298099	-0.889271	0.373858	0.571485	0		0
Chr5	157810970	157816913	-	E/R16	LOC101927697, novel transcript variant	0	0	0	0	0	down			E/R16	162.968	-4.18616	0.647522	-6.4649	1.01368e-10	3.24475e-09	1	both down	1	both down
Chr1	198561199	198568005	-	E/R17	novel intergenic	0	1	1	1	1	up	at SE region	PTPRC	E/R17	no test					1	0		0
Chr2	636130	650492	+	E/R18	novel intergenic	0	0	0	0	0	up		TMEM18	E/R18	88.1057	1.85999	0.714407	2.60355	0.00922641	0.037736	1	both up	1	both up
Chr2	8612155	8628266	-	E/R19	novel intergenic	1	0	0	0	0	up	may be superenhancer	ID2, LOC101929567	E/R19	29.3198	-0.400555	0.386394	-1.03665	0.2999	0.498614	0		0
Chr2	130192035	130201054	-	E/R20	novel intergenic	1	0	0	0	0	up	lnc, may be enhancer		E/R20	6.25393	-1.14911	0.640519	-1.79403	0.0728088	0.184962	0		1	different
Chr8	82076730	82086899	+	E/R21	novel intergenic	1	0	0	0	0	up	lnc, at eRNA region	PAG1	E/R21	171.521	0.209363	0.423739	0.494083	0.621247	0.749529	0		0
Chr9	128902379	128908884	-	E/R22	novel intergenic	1	1	0	0	0	down	lnc, at eRNA region	APOLD1, PBX3	E/R22	9.66535	-0.654867	0.401624	-1.63055	0.102986	0.242076	0		1	both down
Chr10	7505410	7514020	-	E/R23	novel intergenic	0	0	1	0	0	up	lnc, at eRNA region	SFMBT2	E/R23	308.703	-1.58152	0.384928	-4.1086	3.98056e-05	0.000440014	1	different	1	different
Chr14	39018428	39034299	+	E/R24	novel intergenic	1	0	0	0	0	down			E/R24	11.7588	-1.39223	0.532051	-2.61672	0.0088779	0.0366812	1	both down	1	both down
Chr15	100029574	100050094	-	E/R25	novel intergenic	1	1	1	0	0	down	lnc, at eRNA region	MEF2A, LRRC28	E/R25	205.05	-1.19864	0.310877	-3.85566	0.000115417	0.00102621	1	both down	1	both down
Chr13	114060147	114074432	+	E/R26	novel intragenic	1	0	0	0	0	down	lnc, at eRNA region	ADPRHL1	E/R26	1422.73	0.302554	0.394531	0.766872	0.443158	0.616163	0		0
Chr10	85921689	85931906	-	E/R27	HOST2 lncRNA, ucsc annotated BC051760	0	0	0	0	0	up		C10orf99	E/R27	2.34006	1.07245	0.567978	1.88819	0.0590003	0.159809	0		1	both up
Chr20	15862066	15903979	-	E/R28	ucsc annotated intergenic, AK125594	1	0	1	0	0	up		MACROD2 as	E/R28	4020.22	1.92214	0.591928	3.24725	0.00116526	0.00756494	1	both up	1	both up
				total						down	up										9	7	16	11
				28						13	15
Enhancer-like: GRO-seq														RNA-seq
Chr	Start	End	Strand	Name	Type	RUNX1-peak, SEM cells	CD34+ K27ac	CD19/CD20+ K27ac	CD34+ SE	CD19/CD20+ SE	GRO-seq, E/R regulation	Comment	Genes nearby	name	baseMean	log2FoldChange	lfcSE	stat	pvalue	padj	padj < 0.1	Comparison of GRO-seq and RNA-seq	log2FC >0,5 OR log2FC < -0,5	Comparison of GRO-seq and RNA-seq
Chr1	101864524	101876124	-	E/R29	eRNA	1	0	1	0	0	up		LINC01307	E/R29	10.837	-1.58385	0.48457	-3.26856	0.00108098	0.00724787	1	different	1	different
Chr2	97711850	97717058	+	E/R30	eRNA	1	0	0	0	0	up	may be superenhancer	FAM178B, FAHD2B, ANKRD36	E/R30	2.56026	-0.0464027	0.551438	-0.0841485	0.932938	0.970921	0		0
Chr2	98037249	98042804	+	E/R31	eRNA	1	0	0	0	0	up	(lnc)	ACTR1B, COX5B, ANKRD36	E/R31	no test					1	0		0
Chr2	69917047	69922757	-	E/R32	eRNA	1	0	1	0	0	down	may be superenhancer	ANXA4, AAK1	E/R32	6.84644	-1.46526	0.558387	-2.62409	0.00868817	0.0366336	1	both down	1	both down
Chr2	97996206	98001640	-	E/R33	eRNA	1	0	0	0	0	up	may be superenhancer	ACTR1B, COX5B, ANKRD36	E/R33	no test					1	0		0
Chr2	131123902	131130218	-	E/R34	eRNA	1	1	1	0	0	down	enhancer	PTPN18	E/R34	17.2014	1.05085	0.317507	3.30969	0.000934002	0.00636678	1	different	1	different
Chr3	46579442	46585529	+	E/R35	eRNA	1	1	1	0	0	down	may be superenhancer	LRRC2 as	E/R35	4.94346	0.495668	0.491525	1.00843	0.313249	0.510434	0		0
Chr4	154022240	154033269	-	E/R36	eRNA	1	0	0	0	0	down	from eRNA region	TRIM2, CD38, FHDC1	E/R36	3.54576	0.158158	0.522715	0.30257	0.762217	0.851768	0		0
Chr5	179280194	179285958	+	E/R37	eRNA	1	0	1	0	0	up	(lnc)	C5orf45, TBC1D9B	E/R37	2.8585	0.437508	0.577813	0.757179	0.448943	0.616163	0		0
Chr5	133180215	133188298	-	E/R38	eRNA	1	0	1	0	0	down	may be superenhancer	VDAC1, TCF7, C5orf15	E/R38	58.8004	-3.35755	0.431216	-7.78622	6.90434e-15	4.70646e-13	1	both down	1	both down
Chr5	177538668	177545383	-	E/R39	eRNA	1	0	1	0	0	down	ALL SE	N4BP3	E/R39	20.3055	0.312594	0.361069	0.865745	0.38663	0.581367	0		0
Chr7	2145753	2159034	+	E/R40	eRNA	1	0	1	0	0	down		MAD1L1, CHST12	E/R40	51.4284	-1.87261	0.378589	-4.9463	7.56385e-07	1.10486e-05	1	both down	1	both down
Chr11	67183374	67188662	-	E/R41	eRNA	1	0	1	0	0	down	enhancer	PTPRCAP, CARNS1, RPS6KB2, TBC1D10C	E/R41	31.2593	-0.545228	0.268915	-2.02751	0.0426105	0.125379	0		1	both down
Chr12	29302420	29311487	-	E/R42	eRNA	1	1	0	1	0	up	lnc	FAR2	E/R42	no test					1	0		0
Chr12	49565994	49571342	-	E/R43	eRNA	0	0	0	0	0	up	enhancer	TUBA1A	E/R43	1.45973	0.864298	0.639279	1.35199	0.176379	0.358901	0		1	both up
Chr12	122453855	122462386	-	E/R44	eRNA	1	1	1	0	0	down	enhancer	BCL7A	E/R44	153.01	0.265617	0.369839	0.718198	0.472635	0.633796	0		0
Chr15	53820480	53825735	+	E/R45	eRNA	1	0	0	0	0	up	may be superenhancer	WDR72 as	E/R45	2.98147	-0.152917	0.587252	-0.260394	0.79456	0.878311	0		0
Chr17	67564730	67573521	-	E/R46	eRNA	1	0	0	0	0	down	enhancer	MAP2K6	E/R46	10.2391	-0.827462	0.471335	-1.75557	0.0791614	0.197421	0		1	both down
Chr19	54880797	54889761	+	E/R47	eRNA	1	1	1	0	0	down	may be superenhancer	LAIR1	E/R47	59.3362	0.616358	0.363902	1.69375	0.0903133	0.21987	0		1	different
Chr21	40356615	40365363	+	E/R48	eRNA	1	1	0	1	0	down	may be superenhancer	LOC101928435, PSMG1, BRWD1, ETS2	E/R48	12.4658	-0.424752	0.479654	-0.885538	0.375867	0.571485	0		0
Chr22	24814727	24819921	-	E/R49	eRNA	0	0	1	0	1	down	enhancer	ADORA2A	E/R49	3.95213	-0.248502	0.508328	-0.488862	0.624939	0.750013	0		0
Chr16	57624103	57641040	-	E/R50	eRNA	1	1	0	0	0	down	may be enhancer area	GPR56, CCDC102A	E/R50	126.392	-1.74364	0.300143	-5.80938	6.27053e-09	1.34981e-07	1	both down	1	both down
Chr1	23922004	23928710	-	E/R51	eRNA – SE	1	0	1	0	1	down	(lnc)	MDS2, ID3, E2F2, RPL11	E/R51	23.1043	-2.84761	0.458574	-6.2097	5.30865e-10	1.55089e-08	1	both down	1	both down
Chr1	23935985	23946412	-	E/R52	eRNA – SE	1	0	1	0	1	down	(or antisense to long TSS of MDS2)	MDS2, ID3, E2F2, RPL11	E/R52	158.129	-1.22138	0.35186	-3.47121	0.000518112	0.00407515	1	both down	1	both down
Chr3	82127585	82132623	+	E/R53	eRNA - SE / ucsc annotated intergenic BC031255	1	1	0	0	0	up	may be superenhancer	GBE1	E/R53	12.0159	2.23513	0.551429	4.05334	5.04923e-05	0.000516283	1	both up	1	both up
Chr12	9797572	9804153	-	E/R54	eRNA-SE	1	1	1	0	1	down	may be superenhancer	LOC374443 as, CLEC2D	E/R54	no test					1	0		0
Chr13	46961444	46967251	+	E/R55	eRNA-SE	1	0	1	0	1	up	antisense - lnc	KIAA0226L	E/R55	148.521	1.32117	0.44424	2.97399	0.00293955	0.015614	1	both up	1	both up
Chr16	88136161	88148301	-	E/R56	eRNA - SE	1	1	1	1	0	down	lnc, at SE region	BANP	E/R56	8.74707	-1.05814	0.74385	-1.42252	0.154876	0.329918	0		1	both down
Chr17	75442630	75448497	-	E/R57	eRNA-SE	1	1	1	0	1	down	SE	SEPT9	E/R57	35.8181	-0.337574	0.330574	-1.02118	0.307171	0.504549	0		0
																					10	8	15	12
Annotated non-coding transcripts: RNA-seq
name	baseMean	log2FoldChange	lfcSE	stat	pvalue	padj	padj < 0.1	Comparison of GRO-seq and RNA-seq
LOC284648	7.86394	-0.725239	0.44567	-1.6273	0.103673	0.242299	0
KCNQ1OT1	978.28	0.636988	0.272454	2.33797	0.0193888	0.067778	1	both up
SOCS2-AS1	534.096	0.567278	0.303829	1.86709	0.0618885	0.163811	0
LOC374443	888.142	-0.760448	0.263315	-2.88798	0.00387729	0.0195779	1	both down
FLJ42627	9.22049	0.698174	0.416022	1.67821	0.0933053	0.22581	0
LOC728175	945.146	-0.4669	0.350207	-1.33321	0.182463	0.367623	0
PRKY	2305.39	-2.08899	0.734437	-2.84434	0.00445029	0.0216687	1	different
Base mean = the mean of the counts divided by the size factors for the counts for both conditions
pat = promoter antisense transcript

## Sheet: Sheet 2. RNA-seq count values
Table S4. ETV6-RUNX1-regulated denovo transcripts: RNA-seq data
Normalized count values, RNA-seq (GSE79373)
subtype	t12;21	t12;21	t12;21	t12;21	t12;21	t12;21	t12;21	t12;21	t12;21	other	other	other	other	other	other	other	other
sample	RNAseq-ALL3	RNAseq-ALL11	RNAseq-ALL15	RNAseq-ALL8	RNAseq-ALL12	RNAseq-ALL16	RNAseq-ALL1	RNAseq-ALL9	RNAseq-ALL13	RNAseq-ALL-1	RNAseq-ALL7	RNAseq-ALL0	RNAseq-ALL5	RNAseq-ALL2	RNAseq-ALL6	RNAseq-ALL14	RNAseq-ALL4
file name	X413_T_RNASeq	X732_T_RNASeq	X854_T_RNASeq	X691_T_RNASeq	X814_T_RNASeq	X856_T_RNASeq	X373_T_RNASeq	X696_T_RNASeq	X817_T_RNASeq	X315_T_RNASeq	X670_T_RNASeq	X327_T_RNASeq	X442_T_RNASeq	X39_T_RNASeq	X659_T_RNASeq	X819_T_RNASeq	X41_T_RNASeq
E/R1	62.9293	19.6857	6.14332	6.62659	64.5613	25.6077	27.6188	65.715	19.8451	43.0715	9.3841	9.40362	2.73163	11.6224	120.984	9.17006	42.7555
E/R2	1.12374	0	1.53583	1.32532	0.860818	5.25287	0	0	3.05309	0.916416	0.670293	1.88072	2.04872	0	0.823018	0.705389	9.29468
E/R3	445	369.106	331.739	412.174	673.16	126.725	324.158	172.767	338.893	2247.05	3342.75	1120.91	2271.35	2118.19	1418.06	3138.28	882.995
E/R4	157.323	250.992	117.491	180.243	269.436	105.057	136.64	240.602	138.916	281.34	254.041	373.324	321.65	348.673	231.268	153.775	143.138
E/R5	341.616	911.446	959.894	311.45	2466.24	3677.66	2001.64	752.542	1216.66	1908.89	833.174	3307.25	207.604	682.818	360.482	216.554	128.267
E/R6	59.5581	123.035	162.03	92.7723	97.2724	127.382	65.413	109.172	169.446	6.41491	111.269	111.903	139.313	123.488	90.532	74.7713	85.5111
E/R7	294.419	325.798	320.989	418.801	124.819	160.869	156.991	304.197	329.734	284.089	833.844	526.602	600.276	523.009	593.396	572.071	236.085
E/R8	5.61869	13.78	20.7337	17.2291	17.2164	12.4756	20.3507	13.7789	15.2654	8.24774	44.9096	12.2247	28.6821	14.528	21.3985	21.8671	3.71787
E/R9	101.136	65.947	79.0953	75.5432	67.1438	82.7327	39.2478	50.8761	64.1149	248.349	41.5581	55.4813	60.0959	33.4145	117.692	21.8671	85.5111
E/R10	31.4647	15.7485	28.4129	27.8317	14.6339	36.1135	23.258	48.7563	19.8451	78.8118	14.7464	43.2566	42.3403	13.0752	11.5223	12.697	96.6647
E/R11	7.86616	9.84283	21.5016	11.9279	19.7988	36.7701	20.3507	20.1385	38.1636	0.916416	22.79	9.40362	15.7069	14.528	7.40716	7.75928	0
E/R12	5.61869	6.88998	3.83958	74.2178	12.9123	28.8908	21.8043	8.47935	13.7389	10.0806	38.877	31.9723	26.6334	47.9425	47.735	11.2862	40.8966
E/R13	14.6086	2.95285	8.44707	5.30127	4.30409	13.7888	18.8971	8.47935	7.63272	15.5791	11.395	13.1651	5.46326	13.0752	8.23018	9.17006	223.072
E/R14	17.9798	8.85855	16.1262	7.95191	1.72164	12.4756	10.1754	6.35951	12.2124	1.83283	4.69205	5.64217	3.41454	2.90561	4.11509	2.82156	158.01
E/R15	615.808	289.379	360.92	502.296	318.503	228.5	248.569	287.238	560.242	225.438	320.4	291.512	472.572	341.409	708.619	677.174	619.026
E/R16	39.3308	27.5599	1.53583	3.97596	23.2421	1.31322	2.90724	8.47935	7.63272	261.179	81.7757	29.1512	487.596	245.524	9.0532	737.132	803.061
E/R17	0	0	0	0	0	0	0	0	0	0	0	0	0	0	0	0	0
E/R18	1420.4	71.8527	99.829	812.42	35.2935	5.90948	78.4956	42.3968	54.9556	32.991	4.02176	2.82108	3.41454	2.90561	64.1954	5.64311	135.702
E/R19	26.9697	24.6071	16.8941	15.9038	24.9637	29.5474	30.5261	24.3781	36.6371	33.9074	32.174	47.0181	47.1207	13.0752	14.8143	76.182	3.71787
E/R20	6.74243	2.95285	3.83958	6.62659	3.44327	1.96983	1.45362	1.05992	6.10618	0	2.68117	1.88072	21.1701	14.528	30.4517	1.41078	0
E/R21	67.4243	85.6326	158.958	280.968	250.498	232.439	255.837	156.868	166.393	279.507	305.653	114.724	226.725	107.508	60.9033	150.953	14.8715
E/R22	11.2374	8.85855	5.37541	7.95191	4.30409	6.56609	2.90724	10.5992	7.63272	7.33133	6.03263	13.1651	11.6094	13.0752	7.40716	4.93772	35.3198
E/R23	122.487	220.479	81.399	155.062	139.452	229.813	244.209	130.37	70.2211	1124.44	758.771	410.938	435.695	485.237	321.8	211.617	105.959
E/R24	10.1136	2.95285	8.44707	6.62659	0.860818	5.90948	7.26811	6.35951	9.15927	67.8148	5.36234	3.76145	5.46326	13.0752	11.5223	29.6263	5.57681
E/R25	167.437	132.878	145.904	115.303	107.602	78.1364	120.651	85.8534	180.132	237.352	351.904	446.672	220.579	393.71	390.934	247.592	63.2038
E/R26	1695.72	2670.36	1342.32	752.781	1495.24	1159.57	2123.74	1253.88	1608.98	1766.85	1654.28	1909.87	1157.53	1923.51	797.505	100.871	773.318
E/R27	3.37121	5.9057	3.83958	2.65064	0.860818	3.28304	5.81449	3.17976	0	2.74925	0.670293	3.76145	2.04872	0	1.64604	0	0
E/R28	1410.29	10722.8	4906.21	17051.5	385.646	3277.13	1203.6	14189.1	3494.26	512.276	1026.22	492.749	552.473	611.631	476.527	2514.01	5517.32
E/R29	4.49495	2.95285	7.67915	9.27723	0.860818	3.28304	8.72173	6.35951	4.57963	32.991	5.36234	7.52289	15.024	2.90561	8.23018	26.8048	37.1787
E/R30	4.49495	1.96857	2.30375	0	2.58245	3.28304	4.36087	2.11984	0	0.916416	0.670293	0.940362	0.682908	4.35841	2.46905	4.93772	7.43575
E/R31	0	0	0	0	0	0	0	0	0	0	0	0	0	0	0.823018	0	1.85894
E/R32	12.3611	1.96857	1.53583	2.65064	2.58245	1.31322	8.72173	1.05992	0	16.4955	16.087	10.344	10.9265	7.26402	0	6.3485	16.7304
E/R33	0	0.984283	0	0	0	0	0	0	0	0	0	0	0	0	0	0	0
E/R34	28.0934	35.4342	20.7337	17.2291	34.4327	11.1623	27.6188	18.0186	12.2124	8.24774	12.7356	9.40362	7.51199	15.9808	9.0532	13.4024	11.1536
E/R35	8.9899	0.984283	4.60749	1.32532	6.02573	12.4756	7.26811	2.11984	7.63272	8.24774	4.69205	3.76145	1.36582	4.35841	5.76113	0.705389	3.71787
E/R36	3.37121	1.96857	3.07166	1.32532	2.58245	1.96983	7.26811	2.11984	9.15927	4.58208	1.34059	1.88072	0.682908	1.4528	4.93811	1.41078	11.1536
E/R37	2.24748	2.95285	2.30375	3.97596	0	4.59626	0	6.35951	6.10618	0.916416	2.68117	0	0	2.90561	3.29207	2.82156	7.43575
E/R38	8.9899	2.95285	9.21498	10.6025	9.469	14.4454	8.72173	7.41943	18.3185	87.0595	87.8083	233.21	79.9002	216.468	122.63	71.2443	11.1536
E/R39	12.3611	13.78	21.5016	13.2532	24.9637	30.8606	39.2478	21.1984	24.4247	15.5791	16.087	35.7337	17.0727	24.6977	19.7524	3.52695	11.1536
E/R40	34.8359	8.85855	25.3412	25.1811	49.9274	12.4756	15.9898	10.5992	13.7389	64.1491	42.8987	106.261	48.4865	111.866	111.93	43.0287	148.715
E/R41	15.7323	29.5285	29.1808	23.8557	24.1029	33.487	29.0724	23.3182	21.3716	40.3223	34.8552	61.1235	30.7309	53.7538	20.5755	38.091	22.3072
E/R42	0	0	0	0	0	0	0	0	0	0	0	0	0	0	0	0	0
E/R43	0	0.984283	0.767915	1.32532	0.860818	3.93965	4.36087	1.05992	4.57963	0.916416	1.34059	0.940362	0.682908	0	1.64604	1.41078	0
E/R44	174.179	300.206	240.357	88.7963	59.3964	159.556	53.784	287.238	134.336	160.373	106.577	134.472	146.142	76.9986	58.4343	195.393	224.931
E/R45	10.1136	0.984283	0.767915	0	0	1.31322	4.36087	1.05992	7.63272	3.66566	1.34059	2.82108	2.04872	1.4528	6.58414	2.82156	3.71787
E/R46	7.86616	0.984283	4.60749	7.95191	4.30409	13.1322	7.26811	3.17976	18.3185	6.41491	18.7682	6.58253	10.2436	10.1696	37.8588	12.697	3.71787
E/R47	162.942	50.1984	60.6653	67.5912	33.5719	43.3362	75.5884	63.5951	87.0131	28.4089	54.2937	54.541	42.3403	42.1313	38.6819	94.5222	9.29468
E/R48	16.8561	2.95285	19.9658	18.5545	9.469	4.59626	10.1754	8.47935	4.57963	49.4865	5.36234	7.52289	9.56071	7.26402	17.2834	4.93772	14.8715
E/R49	5.61869	1.96857	6.14332	0	6.88654	3.93965	4.36087	1.05992	1.52654	8.24774	5.36234	2.82108	2.73163	4.35841	6.58414	0	5.57681
E/R50	94.394	28.5442	52.9862	46.3861	45.6233	50.5589	81.4028	59.3555	71.7476	100.806	250.019	192.774	232.189	104.602	146.497	226.43	364.352
E/R51	5.61869	4.92142	4.60749	7.95191	6.88654	3.93965	10.1754	2.11984	3.05309	121.883	40.8879	21.6283	15.024	27.6033	27.9826	75.4766	13.0126
E/R52	253.965	92.5226	73.7199	119.279	83.4993	34.1436	61.0521	69.9546	71.7476	316.163	146.124	155.16	126.338	203.393	288.056	204.563	388.518
E/R53	53.9394	10.8271	9.21498	27.8317	6.88654	9.19252	10.1754	31.7976	13.7389	9.16416	0	1.88072	4.78036	1.4528	0.823018	1.41078	11.1536
E/R54	0	0	0	0	0	0	0	0	0	0	0	0	0	0	0	0	0
E/R55	109.003	154.532	248.037	74.2178	108.463	459.626	213.682	266.04	251.88	174.119	124.004	61.1235	20.4872	55.2066	59.2573	134.024	11.1536
E/R56	16.8561	2.95285	1.53583	7.95191	2.58245	1.96983	8.72173	3.17976	1.52654	21.994	0.670293	2.82108	0	10.1696	0	0.705389	65.0628
E/R57	32.5884	31.4971	33.7883	19.8798	61.9789	26.2643	47.9695	12.719	18.3185	24.7432	24.1305	66.7657	38.9258	62.4706	31.2747	45.8503	29.743
FLJ42627	4.49495	10.8271	11.5187	5.30127	13.7731	13.1322	26.1652	3.17976	13.7389	2.74925	4.69205	9.40362	7.51199	14.528	8.23018	5.64311	1.85894
KCNQ1OT1	1104.63	1085.66	1088.14	1569.18	1281.76	1187.8	918.689	719.685	1653.25	679.981	1189.1	662.014	349.649	846.985	493.811	538.212	1262.22
LOC284648	7.86616	1.96857	3.07166	5.30127	6.02573	10.5057	4.36087	8.47935	4.57963	18.3283	10.7247	11.2843	0.682908	5.81122	9.0532	7.05389	18.5894
LOC374443	847.298	449.817	540.612	1001.94	501.857	495.739	465.159	931.669	763.272	925.58	716.543	1134.08	1690.88	833.91	1125.89	1807.91	866.264
LOC728175	357.349	383.87	936.857	783.263	721.365	572.563	1969.66	801.299	647.255	2238.8	604.604	961.99	942.413	666.837	747.3	1611.11	1120.94
PRKY	91.0227	87.6012	83.7028	3337.15	108.463	2747.25	122.104	101.752	74.8007	86.1431	4269.76	9271.96	3068.99	11067.5	2920.89	343.525	1409.07
SOCS2-AS1	684.356	669.312	642.745	752.781	507.883	362.448	529.118	800.239	746.48	350.071	387.429	345.113	461.646	704.61	490.519	559.374	85.5111
