# Supplementary material for: Genome-wide repression of eRNA and target gene loci by the ETV6-RUNX1 fusion in acute leukemia
Source: HighWire-hosted journal article supplement (doi:10.1101/gr.193649.115), 2016-09-12
Supplement: Supplemental_Table_S5.xlsx [file Supplemental_Table_S5.xlsx]

## Sheet: Table S5. Approach 1 and 2
Table S5. E/R-regulated candidate genes.
DOWNREGULATED PROTEIN-CODING
TRANSCRIPT-centric (approach 1)					ENHANCER-centric (approach 2)
Entrez ID	Symbol	Log2FC	FC		Entrez ID	Symbol	Log2FC	FC
104	ADARB1	-0.452737	0.730655		79602	ADIPOR2	-0.334751	0.792921
135	ADORA2A	-1.10119	0.466133		156	ADRBK1	-0.499082	0.707557
81575	APOLD1	-0.490117	0.711967		10327	AKR1A1	-0.283991	0.821316
393	ARHGAP4	-0.562285	0.677229		338692	ANKRD13D	-0.470004	0.721963
23400	ATP13A2	-0.934117	0.523363		23370	ARHGEF18	-0.410583	0.752319
57597	BAHCC1	-0.731558	0.602253		23400	ATP2A3	-0.934117	0.523363
648	BMI1	-0.659745	0.63299		605	BCL7A	-0.376442	0.770335
348738	C2orf48	-0.483023	0.715477		55009	C19orf24	-0.53115	0.692003
51149	C5orf45	-0.628243	0.646964		348738	C6orf48	-0.483023	0.715477
55501	CHST12	-0.574433	0.67155		865	CBFB	-0.255297	0.837815
161198	CLEC14A	-0.637309	0.642911		55038	CDCA4	-0.407626	0.753863
29121	CLEC2D	-0.659347	0.633165		1025	CDK9	-0.468503	0.722714
112616	CMTM7	-0.524189	0.69535		150383	CDPF1	-0.706485	0.612811
23412	COMMD3	-1.02502	0.491402		64793	CEP85	-0.278941	0.824196
100532731	COMMD3-BMI1	-0.745655	0.596397		23152	CIC	-0.631826	0.645359
27132	CPNE7	-1.21979	0.429344		54982	CLN6	-0.314449	0.804158
1445	CSK	-0.598748	0.660327		2067	ERCC1	-0.63501	0.643936
80314	EPC1	-0.431946	0.741261		9415	FADS2	-0.337387	0.791474
9002	F2RL3	-1.62983	0.323127		2289	FKBP5	-0.351318	0.783868
199786	FAM129C	-1.06526	0.477887		79760	GEMIN7	-0.452645	0.730702
23149	FCHO1	-0.629818	0.646258		9535	GMFG	-0.404717	0.755384
23048	FNBP1	-0.533597	0.69083		2852	GPER1	-0.589967	0.664358
2356	FPGS	-0.576841	0.67043		115330	GPR146	-0.932478	0.523957
6596	HLTF	-0.685249	0.621898		84842	HPDL	-0.647192	0.638522
3543	IGLL1	-1.03901	0.486661		84941	HSH2D	-0.677653	0.625182
3638	INSIG1	-0.665497	0.630471		3399	ID3	-0.706984	0.612599
3676	ITGA4	-0.566483	0.675261		50615	IL21R	-0.553045	0.68158
81621	KAZALD1	-1.18861	0.438725		83855	KLF16	-0.480357	0.7168
3799	KIF5B	-0.471293	0.721318		389816	LRRC26	-0.720249	0.606993
3903	LAIR1	-0.648945	0.637746		55090	MED9	-0.378079	0.769462
3904	LAIR2	-0.719895	0.607141		151194	METTL21A	-0.499531	0.707337
7462	LAT2	-1.69102	0.309707		100507436	MICA	-0.477021	0.71846
414332	LCN10	-1.69204	0.309489		4597	MVD	-0.560325	0.67815
138307	LCN8	-1.78316	0.290545		84700	MYO18A	-0.617589	0.651759
4047	LSS	-0.60748	0.656342		51237	MZB1	-0.417909	0.748509
84930	MASTL	-0.518687	0.698007		51203	NUSAP1	-0.360699	0.778787
64780	MICAL1	-0.809381	0.570627		201164	PLD6	-0.627068	0.647491
8028	MLLT10	-0.519889	0.697426		5499	PPP1CA	-0.994784	0.501811
55149	MTPAP	-0.612259	0.654171		284352	PPP1R37	-0.313515	0.804679
84700	MYO18B	-0.617589	0.651759		5533	PPP3CC	-0.325119	0.798232
23138	N4BP3	-1.10156	0.466012		5052	PRDX1	-0.337321	0.79151
89796	NAV1	-0.504503	0.704903		25865	PRKD2	-0.331188	0.794882
375387	NRROS	-1.04787	0.483681		51655	RASD1	-1.48128	0.35817
27143	PALD1	-0.640217	0.641616		5982	RFC2	-0.38509	0.765731
23590	PDSS1	-0.561876	0.677421		29901	SAC3D1	-0.795105	0.576301
5790	PTPRCAP	-1.37685	0.385057		10801	SEPT9	-0.489234	0.712403
10235	RASGRP2	-1.64908	0.318844		387640	SKIDA1	-0.618188	0.651488
10287	RGS19	-1.06409	0.478275		79751	SLC25A22	-0.533176	0.691032
440804	RIMBP3B	-1.21789	0.429912		6720	SREBF1	-0.343003	0.788398
440804	RIMBP3C	-1.22879	0.426674		27090	ST6GALNAC4	-0.55492	0.680695
64777	RMND5B	-1.16455	0.446102		25777	SUN2	-0.541595	0.687011
89958	SAPCD2	-1.30453	0.404854		7153	TOP2A	-0.281817	0.822555
10044	SH2D3C	-1.353	0.391476		27348	TOR1B	-0.438584	0.737858
8835	SOCS2	-0.745831	0.596324		7171	TPM4	-0.463925	0.725011
6693	SPN	-0.725465	0.604802		84959	UBASH3B	-0.415327	0.74985
6713	SQLE	-0.604942	0.657498		167127	UGT3A2	-0.539009	0.688243
6890	TAP1	-0.877344	0.544369		79720	VPS37B	-0.353835	0.782501
374403	TBC1D10C	-2.457	0.182124		55762	ZNF701	-0.646043	0.63903
93081	TEX30	-1.13951	0.453914
79896	THNSL1	-1.00736	0.497457
7128	TNFAIP3	-0.650488	0.637065
7416	VDAC1	-0.506866	0.70375
7494	XBP1	-0.745212	0.59658
27300	ZNF544	-0.609761	0.655305
Downregulated non-coding
TRANSCRIPT-centric (approach 1)					ENHANCER-centric (approach 2)
Entrez ID	Symbol	Log2FC	FC		Entrez ID	Symbol	Log2FC	FC
728175	LOC728175	-1.04027	0.486237		374443	LOC374443	-0.604282	0.657799
645644	FLJ42627	-0.80658	0.571736		100499489	LOC100499489	-0.767616	0.587387
284648	LOC284648	-1.34093	0.394766		100133612	LINC01134	-0.800682	0.574078
144481	SOCS2-AS1	-0.715392	0.609039		220930	ZEB1-AS1	-1.06605	0.477626
UPREGULATED PROTEIN-CODING
TRANSCRIPT-centric (approach 1)					ENHANCER-centric (approach 2)
Entrez ID	Symbol	Log2FC	FC		Entrez ID	Symbol	Log2FC	FC
162	AP1B1	0.551177	1.46528		60468	BACH2	0.530862	1.44479
22809	ATF5	0.59866	1.51431		694	BTG1	0.609834	1.52608
55729	ATF7IP	0.519477	1.43344		123207	C15orf40	0.316674	1.24546
23200	ATP11B	0.586104	1.50119		839	CASP6	0.510511	1.42455
29760	BLNK	0.479082	1.39386		933	CD22	0.354736	1.27875
79603	CERS4	0.505081	1.4192		9685	CLINT1	0.279315	1.21362
54677	CROT	0.960729	1.94629		79071	ELOVL6	0.256235	1.19436
6468	FBXW4	0.979017	1.97112		83641	FAM107B	0.49318	1.40754
114793	FMNL2	0.475188	1.3901		3383	ICAM1	0.721764	1.6492
2589	GALNT1	0.552694	1.46682		3386	ICAM4	0.915879	1.88672
2632	GBE1	0.597382	1.51297		3551	IKBKB	0.291774	1.22414
84636	GPR174	1.55466	2.93764		90550	MCU	0.311655	1.24113
26086	GPSM1	0.966213	1.95371		91754	NEK9	0.361775	1.28501
10750	GRAP	0.599656	1.51536		23596	OPN3	0.413258	1.33169
400581	GRAPL	0.794795	1.73483		5142	PDE4B	0.51126	1.42529
51020	HDDC2	0.62072	1.53764		5450	POU2AF1	0.524924	1.43886
9953	HS3ST3B1	0.536479	1.45043		6004	RGS16	0.408643	1.32744
3428	IFI16	0.630586	1.54819		6303	SAT1	0.77357	1.70949
80183	KIAA0226L	1.05472	2.07732		6389	SDHA	0.328963	1.25611
4154	MBNL1	0.691423	1.61488		202018	TAPT1	0.317941	1.24655
133686	NADK2	0.488303	1.40279		7091	TLE4	0.364852	1.28775
57224	NHSL1	0.83303	1.78142		7324	UBE2E1	0.300553	1.23162
22822	PHLDA1	1.78501	3.4462		9686	VGLL4	0.323065	1.25099
9701	PPP6R2	0.453602	1.36946		9839	ZEB2	0.387648	1.30826
5729	PTGDR	0.656313	1.57605
8437	RASAL1	0.402384	1.32169
6192	RPS4Y1	1.69729	3.24292
57713	SFMBT2	0.512349	1.42637
157285	SGK223	0.570096	1.48462
23235	SIK2	0.695278	1.6192
6641	SNTB1	0.698732	1.62308
200734	SPRED2	0.442439	1.3589
6711	SPTBN1	0.521681	1.43563
90665	TBL1Y	1.18129	2.26779
7273	TTN	0.966051	1.95349
9189	ZBED1	0.78339	1.72117
7544	ZFY	0.965927	1.95332
UPREGULATED NON-CODING
TRANSCRIPT-centric (approach 1)					ENHANCER-centric (approach 2)
Entrez ID	Symbol	Log2FC	FC		Entrez ID	Symbol	Log2FC	FC
5616	PRKY	1.21562	2.32241		654433	PAX8-AS1	0.33258	1.25926
10984	KCNQ1OT1	0.636522	1.55458		10015	PDCD6IP	0.336129	1.26236
					79970	ZNF767P	0.251304	1.19028

## Sheet: Table S5. Intersect of apprs
Table S5.
The coding genes detected by both the transcript- and the enhancer-centric approaches (up- and downregulated)
Entrez ID	Symbol	WikiGene Description	Transmembrane domain (tmhmm) (in any of the transcript variants)	signal peptide (any transcript variant)	coiled coil (ncoils) (any transcript variant)	Phenotype description	Ensembl Protein Family Description
104	ADARB1	adenosine deaminase, RNA-specific, B1					DOUBLE STRANDED RNA SPECIFIC EDITASE EC_3.5.-.- RNA ADENOSINE DEAMINASE RNA EDITING DEAMINASE RNA EDITING ENZYME DSRNA ADENOSINE DEAMINASE
393	ARHGAP4	Rho GTPase activating protein 4			ncoils		SLIT ROBO RHO GTPASE ACTIVATING RHO GTPASE ACTIVATING
22809	ATF5	activating transcription factor 5			ncoils		CYCLIC AMP DEPENDENT TRANSCRIPTION FACTOR ATF 5 CAMP DEPENDENT TRANSCRIPTION FACTOR ATF 5 ACTIVATING TRANSCRIPTION FACTOR 5 TRANSCRIPTION FACTOR ATFX
57597	BAHCC1	BAH domain and coiled-coil containing 1			ncoils		BAH AND COILED COIL DOMAIN CONTAINING 1
29760	BLNK	B-cell linker				Autosomal agammaglobulinemia	B CELL LINKER B CELL ADAPTER CONTAINING A SH2 DOMAIN B CELL ADAPTER CONTAINING A SRC HOMOLOGY 2 DOMAIN CYTOPLASMIC ADAPTER SRC HOMOLOGY 2 DOMAIN CONTAINING LEUKOCYTE OF 65 KDA SLP 65
648	BMI1	BMI1 proto-oncogene, polycomb ring finger					POLYCOMB COMPLEX BMI 1 POLYCOMB GROUP RING FINGER 4
55501	CHST12	carbohydrate (chondroitin 4) sulfotransferase 12	Tmhmm				CARBOHYDRATE SULFOTRANSFERASE 12 EC_2.8.2.5 CHONDROITIN 4 O SULFOTRANSFERASE 2 CHONDROITIN 4 SULFOTRANSFERASE 2 C4ST 2 C4ST2
29121	CLEC2D	C-type lectin domain family 2, member D	Tmhmm	Sigp			C TYPE LECTIN DOMAIN FAMILY 2 MEMBER D LECTIN NK CELL RECEPTOR LECTIN TRANSCRIPT 1 LLT 1 OSTEOCLAST INHIBITORY LECTIN
112616	CMTM7	CKLF-like MARVEL transmembrane domain containing 7	Tmhmm				CKLF MARVEL TRANSMEMBRANE DOMAIN CONTAINING 7 CHEMOKINE FACTOR SUPERFAMILY MEMBER 7
23412	COMMD3	COMM domain containing 3			ncoils		COMM DOMAIN CONTAINING 3
100532731	COMMD3-BMI1	COMMD3-BMI1 readthrough					COMM DOMAIN CONTAINING 3, POLYCOMB COMPLEX BMI 1 POLYCOMB GROUP RING FINGER 4
1445	CSK	c-src tyrosine kinase					TYROSINE KINASE CSK EC_2.7.10.2 C SRC KINASE
9002	F2RL3	coagulation factor II (thrombin) receptor-like 3	Tmhmm	Sigp			PROTEINASE ACTIVATED RECEPTOR PRECURSOR PAR COAGULATION FACTOR II RECEPTOR THROMBIN RECEPTOR
23048	FNBP1	formin binding protein 1			ncoils		FORMIN BINDING 1
2356	FPGS	folylpolyglutamate synthase		Sigp			FOLYLPOLYGLUTAMATE SYNTHASE MITOCHONDRIAL PRECURSOR EC_6.3.2.17 FOLYLPOLY GAMMA GLUTAMATE SYNTHETASE FPGS TETRAHYDROFOLATE SYNTHASE
2632	GBE1	glucan (1,4-alpha-), branching enzyme 1				Several forms of diseases related to glycogen storage disease due to glycogen branching enzyme deficiency	1 4 ALPHA GLUCAN BRANCHING ENZYME EC_2.4.1.18 GLYCOGEN BRANCHING ENZYME
84636	GPR174	G protein-coupled receptor 174	Tmhmm				PROBABLE G COUPLED RECEPTOR 174
26086	GPSM1	G-protein signaling modulator 1					G SIGNALING MODULATOR 1 ACTIVATOR OF G SIGNALING 3
10750	GRAP	GRB2-related adaptor protein					GROWTH FACTOR RECEPTOR BOUND 2 ADAPTER GRB2 SH2/SH3 ADAPTER GRB2
400581	GRAPL	GRB2-related adaptor protein-like					GROWTH FACTOR RECEPTOR BOUND 2 ADAPTER GRB2 SH2/SH3 ADAPTER GRB2
9953	HS3ST3B1	heparan sulfate (glucosamine) 3-O-sulfotransferase 3B1	Tmhmm				HEPARAN SULFATE GLUCOSAMINE 3 O SULFOTRANSFERASE HEPARAN SULFATE D GLUCOSAMINYL 3 O SULFOTRANSFERASE 3 OST HEPARAN SULFATE 3 O SULFOTRANSFERASE H3 OST
3428	IFI16	interferon, gamma-inducible protein 16					INTERFERON IFI INTERFERON INDUCIBLE
3543	IGLL1	immunoglobulin lambda-like polypeptide 1				Autosomal agammaglobulinemia	UNKNOWN
3676	ITGA4	integrin, alpha 4 (antigen CD49D, alpha 4 subunit of VLA-4 receptor)	Tmhmm	Sigp			INTEGRIN ALPHA 4 PRECURSOR CD49 ANTIGEN FAMILY MEMBER D INTEGRIN ALPHA IV VLA 4 SUBUNIT ALPHA CD49D ANTIGEN
81621	KAZALD1	Kazal-type serine peptidase inhibitor domain 1		Sigp			KAZAL TYPE SERINE PROTEASE INHIBITOR DOMAIN CONTAINING 1 PRECURSOR
80183	KIAA0226L	KIAA0226-like					RUN DOMAIN BECLIN 1 INTERACTING AND CYSTEINE RICH CONTAINING RUBICON
3903	LAIR1	leukocyte-associated immunoglobulin-like receptor 1	Tmhmm	Sigp			LEUKOCYTE ASSOCIATED IMMUNOGLOBULIN RECEPTOR PRECURSOR LAIR ANTIGEN
3904	LAIR2	leukocyte-associated immunoglobulin-like receptor 2		Sigp			LEUKOCYTE ASSOCIATED IMMUNOGLOBULIN RECEPTOR PRECURSOR LAIR ANTIGEN
7462	LAT2	linker for activation of T cells family, member 2	Tmhmm	Sigp		Williams syndrome	LINKER ACTIVATION OF T CELLS FAMILY MEMBER 2 LINKER ACTIVATION OF B CELLS MEMBRANE ASSOCIATED ADAPTER MOLECULE NON T CELL ACTIVATION LINKER WILLIAMS BEUREN SYNDROME CHROMOSOMAL REGION 15
4154	MBNL1	muscleblind-like splicing regulator 1				MYOTONIC DYSTROPHY 1	MUSCLEBLIND
64780	MICAL1	microtubule associated monooxygenase, calponin and LIM domain containing 1			ncoils		METHIONINE SULFOXIDE OXIDASE EC_1.14.13.- MOLECULE INTERACTING WITH CASL MICAL
8028	MLLT10	myeloid/lymphoid or mixed-lineage leukemia (trithorax homolog, Drosophila); translocated to, 10	Tmhmm		ncoils	Precursor T-cell acute lymphoblastic leukemia	AF ALL1 FUSED GENE FROM CHROMOSOME
23138	N4BP3	NEDD4 binding protein 3			ncoils		NEDD4 BINDING 3 N4BP3
133686	NADK2	NAD kinase 2, mitochondrial				24-@DIENOYL-CoA REDUCTASE DEFICIENCY (1 family)	NAD KINASE 2 MITOCHONDRIAL PRECURSOR EC_2.7.1.23 MITOCHONDRIAL NAD KINASE NAD KINASE DOMAIN CONTAINING 1 MITOCHONDRIAL
57224	NHSL1	NHS-like 1			ncoils		NHS 1
27143	PALD1	phosphatase domain containing, paladin 1					PALADIN
5729	PTGDR	prostaglandin D2 receptor (DP)	Tmhmm			ASTHMA-RELATED TRAITS SUSCEPTIBILITY TO 1	PROSTAGLANDIN RECEPTOR RECEPTOR RECEPTOR PROSTANOID RECEPTOR
5790	PTPRCAP	protein tyrosine phosphatase, receptor type, C-associated protein	Tmhmm	Sigp			TYROSINE PHOSPHATASE RECEPTOR TYPE C ASSOCIATED PTPRC ASSOCIATED CD45 ASSOCIATED CD45 AP
10235	RASGRP2	RAS guanyl releasing protein 2 (calcium and DAG-regulated)			ncoils	Bleeding disorder platelet-type 18	RAS GUANYL RELEASING CALCIUM AND DAG REGULATED GUANINE NUCLEOTIDE EXCHANGE FACTOR CALDAG
10287	RGS19	regulator of G-protein signaling 19					REGULATOR OF G SIGNALING
64777	RMND5B	required for meiotic nuclear division 5 homolog B (S. cerevisiae)					RMD5 HOMOLOG
89958	SAPCD2	suppressor APC domain containing 2			ncoils		SUPPRESSOR APC DOMAIN CONTAINING 2
10044	SH2D3C	SH2 domain containing 3C					BREAST CANCER ANTI ESTROGEN RESISTANCE 3
23235	SIK2	salt-inducible kinase 2					SERINE/THREONINE KINASE EC_2.7.11.1 SALT INDUCIBLE KINASE SIK SERINE/THREONINE KINASE SNF1 KINASE
6641	SNTB1	syntrophin, beta 1 (dystrophin-associated protein A1, 59kDa, basic component 1)					1 SYNTROPHIN 59 KDA DYSTROPHIN ASSOCIATED A1 COMPONENT 1 SYNTROPHIN
200734	SPRED2	sprouty-related, EVH1 domain containing 2					SPROUTY RELATED EVH1 DOMAIN CONTAINING SPRED
374403	TBC1D10C	TBC1 domain family, member 10C					TBC1 DOMAIN FAMILY MEMBER
79896	THNSL1	threonine synthase-like 1 (S. cerevisiae)					THREONINE SYNTHASE 1 TSH1
7128	TNFAIP3	tumor necrosis factor, alpha-induced protein 3					TUMOR NECROSIS FACTOR ALPHA INDUCED 3 TNF ALPHA INDUCED 3 EC_3.4.19.12 EC_6.3.2.- DNA BINDING A20 ZINC FINGER A20
7416	VDAC1	voltage-dependent anion channel 1					VOLTAGE DEPENDENT ANION SELECTIVE CHANNEL VDAC OUTER MITOCHONDRIAL MEMBRANE PORIN
7494	XBP1	X-box binding protein 1		Sigp	ncoils	MAJOR AFFECTIVE DISORDER 7	X BOX BINDING 1 {ECO: ECO: } XBP 1 {ECO: } TAX RESPONSIVE ELEMENT BINDING 5 {ECO: |PUBMED: } TREB 5 {ECO: } [CONTAINS X BOX BINDING 1 CYTOPLASMIC FORM {ECO: }; X BOX BINDING 1 LUMINAL FORM {ECO: }]
