# Supplementary material for: Genome-wide repression of eRNA and target gene loci by the ETV6-RUNX1 fusion in acute leukemia
Source: HighWire-hosted journal article supplement (doi:10.1101/gr.193649.115), 2016-09-12
Supplement: Supplemental_Table_S6.xlsx [file Supplemental_Table_S6.xlsx]

## Sheet: Table S6. DAVID
Table S6. Gene ontology analyses of E/R-regulated genes and eRNA regions.
Sheet 1: DAVID analysis of the transcript-centric and enhancer-centric gene lists analyzed both separately and combined. Background gene set expression was from GRO-seq experiment with rpkm 1. The results with EASE (adjusted) p-value cutoff < 0.05 are shown.
Only "transcript-centric" genes
			of 104 genes				EntrezIDs
Category	Term	Count	%	PValue	FDR	Fold Enrichment	Genes	List Total	Pop Hits	Pop Total
GOTERM_BP_FAT	GO:0007166~cell surface receptor linked signal transduction	13	12.5	0.000438645	0.666583	3.25623	29121, 135, 6468, 5729, 23235, 84636, 6711, 7462, 3676, 6693, 8835, 10287, 9002	71	250	4446
GOTERM_BP_FAT	GO:0007242~intracellular signaling cascade	15	14.4231	0.00214011	3.21311	2.45247	135, 8437, 1445, 29760, 393, 10044, 23235, 10235, 200734, 7462, 8835, 10287, 9002, 3428, 10750	71	383	4446
GOTERM_BP_FAT	GO:0001775~cell activation	6	5.76923	0.0176401	23.7616	3.87338	135, 3676, 81575, 6693, 29760, 7462	71	97	4446
GOTERM_BP_FAT	GO:0006955~immune response	7	6.73077	0.0219999	28.7596	3.13099	7494, 6693, 29760, 3543, 3903, 6890, 7462	71	140	4446
GOTERM_BP_FAT	GO:0007186~G-protein coupled receptor protein signaling pathway	5	4.80769	0.0296393	36.7864	4.17465	135, 5729, 84636, 10287, 9002	71	75	4446
GOTERM_BP_FAT	GO:0006952~defense response	6	5.76923	0.033852	40.8429	3.26712	135, 6693, 29760, 5790, 7416, 6890	71	115	4446
Category	Term	Count	%	PValue	FDR	Fold Enrichment	Genes	List Total	Pop Hits	Pop Total
GOTERM_CC_FAT	GO:0005886~plasma membrane	25	24.0385	7.13567e-06	0.00872224	2.55794	26086, 29121, 135, 84636, 3903, 200734, 7416, 6890, 3676, 9002, 9953, 6641, 1445, 29760, 5729, 10235, 393, 5790, 6711, 7462, 162, 6693, 81575, 10287, 23048	64	600	3929
GOTERM_CC_FAT	GO:0044459~plasma membrane part	17	16.3462	0.000207086	0.252847	2.76095	26086, 29121, 135, 1445, 10235, 393, 6711, 200734, 6890, 3676, 162, 6693, 10287, 9002, 6641, 9953, 23048	64	378	3929
GOTERM_CC_FAT	GO:0005576~extracellular region	10	9.61538	0.00253329	3.05303	3.30057	2589, 81575, 6693, 3543, 81621, 9002, 414332, 112616, 138307, 3904	64	186	3929
GOTERM_CC_FAT	GO:0009898~internal side of plasma membrane	6	5.76923	0.0187834	20.6888	3.79736	26086, 162, 6711, 200734, 6641, 23048	64	97	3929
GOTERM_CC_FAT	GO:0005887~integral to plasma membrane	7	6.73077	0.048367	45.4478	2.58876	29121, 135, 3676, 6693, 9002, 9953, 6890	64	166	3929
Category	Term	Count	%	PValue	FDR	Fold Enrichment	Genes	List Total	Pop Hits	Pop Total
GOTERM_MF_FAT	GO:0005070~SH3/SH2 adaptor activity	5	4.80769	0.000148636	0.185988	17.2245	8835, 29760, 10044, 393, 10750	71	17	4158
GOTERM_MF_FAT	GO:0060090~molecular adaptor activity	5	4.80769	0.000428678	0.535538	13.3099	8835, 29760, 10044, 393, 10750	71	22	4158
GOTERM_MF_FAT	GO:0030674~protein binding, bridging	5	4.80769	0.000832704	1.03786	11.2622	8835, 29760, 10044, 393, 10750	71	26	4158
GOTERM_MF_FAT	GO:0030695~GTPase regulator activity	6	5.76923	0.0354852	36.3952	3.22367	26086, 8437, 374403, 10044, 10235, 393	71	109	4158
GOTERM_MF_FAT	GO:0060589~nucleoside-triphosphatase regulator activity	6	5.76923	0.0418297	41.4409	3.08228	26086, 8437, 374403, 10044, 10235, 393	71	114	4158
Category	Term	Count	%	Pvalue <0.1	FDR	Fold Enrichment	Genes	List Total	Pop Hits	Pop Total
KEGG_PATHWAY	hsa04080:Neuroactive ligand-receptor interaction	3	2.88462	0.0178953	15.1439	13.616	135, 5729, 9002	25	15	1702
KEGG_PATHWAY	hsa05340:Primary immunodeficiency	3	2.88462	0.0310227	24.9178	10.212	29760, 3543, 6890	25	20	1702
Category	Term	Count	%	Pvalue <0.1	FDR	Fold Enrichment	Genes	List Total	Pop Hits	Pop Total
REACTOME_PATHWAY	REACT_604:Hemostasis	5	4.80769	0.00674255	4.86462	5.92752	3676, 1445, 6693, 10235, 9002	19	61	1374
REACTOME_PATHWAY	REACT_13552:Integrin cell surface interactions	3	2.88462	0.0174554	12.1732	13.5592	3676, 1445, 10235	19	16	1374
Category	Term	Count	%	PValue	FDR	Fold Enrichment	Genes	List Total	Pop Hits	Pop Total
SP_PIR_KEYWORDS	cell membrane	16	15.3846	1.84754e-05	0.0224238	3.70298	26086, 29121, 135, 1445, 5729, 29760, 10235, 84636, 6711, 3903, 7416, 7462, 81575, 9002, 6641, 23048	98	260	5897
SP_PIR_KEYWORDS	disulfide bond	15	14.4231	8.38525e-05	0.101735	3.44505	29121, 135, 5729, 81621, 84636, 3903, 414332, 3904, 138307, 3676, 2589, 161198, 3543, 9002, 9953	98	262	5897
SP_PIR_KEYWORDS	SH2 domain	6	5.76923	0.0003119	0.377938	9.75786	1445, 8835, 29760, 10044, 400581, 10750	98	37	5897
SP_PIR_KEYWORDS	membrane	37	35.5769	0.00207572	2.49066	1.58803	29121, 26086, 135, 10044, 84636, 23200, 3903, 200734, 7416, 6890, 3676, 161198, 3638, 9002, 6641, 9953, 55501, 79603, 23400, 23138, 1445, 22822, 29760, 5729, 5790, 10235, 6713, 6711, 375387, 7462, 162, 2589, 81575, 6693, 10287, 112616, 23048	98	1402	5897
SP_PIR_KEYWORDS	sh3 domain	5	4.80769	0.00564463	6.6403	6.83789	1445, 393, 400581, 23048, 10750	98	44	5897
SP_PIR_KEYWORDS	glycoprotein	17	16.3462	0.00875852	10.1279	1.99795	29121, 135, 5729, 81621, 84636, 6711, 3903, 414332, 138307, 375387, 3676, 2589, 161198, 6693, 9002, 9953, 55501	98	512	5897
SP_PIR_KEYWORDS	receptor	8	7.69231	0.0153368	17.1058	3.0276	29121, 135, 3676, 5729, 84636, 3903, 9002, 3904	98	159	5897
SP_PIR_KEYWORDS	cytoplasmic vesicle	5	4.80769	0.0166165	18.404	5.01446	22822, 162, 200734, 23048, 23138	98	60	5897
SP_PIR_KEYWORDS	Immunoglobulin domain	4	3.84615	0.0274757	28.6931	6.01735	3543, 81621, 3903, 3904	98	40	5897
SP_PIR_KEYWORDS	g-protein coupled receptor	4	3.84615	0.0274757	28.6931	6.01735	135, 5729, 84636, 9002	98	40	5897
SP_PIR_KEYWORDS	Lectin	3	2.88462	0.0459147	43.4773	8.59621	29121, 2589, 161198	98	21	5897
Only "enhancer-centric" genes
			of 131 genes
Category	Term	Count	%	PValue	FDR	Fold Enrichment	Genes	List Total	Pop Hits	Pop Total
GOTERM_BP_FAT	GO:0007186~G-protein coupled receptor protein signaling pathway	10	7.63359	4.07787e-05	0.0637608	5.81176	5729, 84636, 10287, 115330, 9002, 156, 51655, 83855, 2852, 23596	102	75	4446
GOTERM_BP_FAT	GO:0007166~cell surface receptor linked signal transduction	15	11.4504	0.00137362	2.12695	2.61529	29121, 5729, 23235, 84636, 156, 51655, 7462, 3676, 10287, 115330, 9002, 7091, 83855, 2852, 23596	102	250	4446
GOTERM_BP_FAT	GO:0046649~lymphocyte activation	8	6.10687	0.00153438	2.37308	4.58824	50615, 2067, 84941, 3676, 29760, 865, 3383, 7462	102	76	4446
GOTERM_BP_FAT	GO:0045321~leukocyte activation	8	6.10687	0.00293296	4.49011	4.10242	50615, 2067, 84941, 3676, 29760, 865, 3383, 7462	102	85	4446
GOTERM_BP_FAT	GO:0001775~cell activation	8	6.10687	0.00611698	9.15055	3.59491	50615, 2067, 84941, 3676, 29760, 865, 3383, 7462	102	97	4446
GOTERM_BP_FAT	GO:0007242~intracellular signaling cascade	17	12.9771	0.0117017	16.8147	1.93473	1445, 29760, 10235, 393, 10044, 23235, 200734, 7153, 3551, 51655, 7462, 25865, 10287, 9002, 79602, 3428, 10750	102	383	4446
GOTERM_BP_FAT	GO:0006955~immune response	9	6.87023	0.0135806	19.2541	2.8021	7494, 2067, 29760, 3543, 3903, 5450, 5052, 3383, 7462	102	140	4446
GOTERM_BP_FAT	GO:0002443~leukocyte mediated immunity	4	3.05344	0.0182111	24.9831	6.97412	2067, 5052, 3383, 7462	102	25	4446
GOTERM_BP_FAT	GO:0008277~regulation of G-protein coupled receptor protein signaling pathway	3	2.29008	0.0204185	27.5781	13.0765	26086, 156, 6004	102	10	4446
GOTERM_BP_FAT	GO:0005976~polysaccharide metabolic process	4	3.05344	0.0224168	29.8545	6.45752	2632, 54982, 5499, 55501	102	27	4446
GOTERM_BP_FAT	GO:0002252~immune effector process	4	3.05344	0.0472942	53.1289	4.84314	2067, 5052, 3383, 7462	102	36	4446
GOTERM_BP_FAT	GO:0042981~regulation of apoptosis	13	9.92366	0.049734	54.9715	1.81037	2067, 694, 393, 7153, 3551, 839, 5052, 5533, 23370, 7128, 3399, 3428, 22809	102	313	4446
Category	Term	Count	%	PValue	FDR	Fold Enrichment	Genes	List Total	Pop Hits	Pop Total
GOTERM_CC_FAT	GO:0005886~plasma membrane	30	22.9008	2.21914e-05	0.027176	2.2073	29121, 26086, 84636, 3903, 200734, 3386, 7416, 10327, 156, 51655, 9415, 3383, 3676, 115330, 9002, 6641, 9953, 2852, 10801, 1445, 29760, 5729, 10235, 393, 5790, 933, 7462, 10287, 23048, 23596	89	600	3929
GOTERM_CC_FAT	GO:0044459~plasma membrane part	20	15.2672	0.000525835	0.642127	2.33577	29121, 26086, 1445, 10235, 393, 933, 200734, 10327, 156, 51655, 9415, 3383, 3676, 10287, 9002, 6641, 9953, 23048, 2852, 23596	89	378	3929
GOTERM_CC_FAT	GO:0031224~intrinsic to membrane	35	26.7176	0.028176	29.5345	1.36615	29121, 84636, 202018, 3903, 3386, 25777, 7416, 9415, 3383, 50615, 3676, 389816, 115330, 9002, 9953, 79602, 55501, 23400, 2852, 201164, 27090, 79751, 5729, 5790, 167127, 79071, 933, 90550, 7462, 151194, 54982, 10287, 6720, 112616, 23596	89	1131	3929
GOTERM_CC_FAT	GO:0016021~integral to membrane	34	25.9542	0.0308041	31.8332	1.36825	29121, 84636, 202018, 3903, 3386, 25777, 7416, 9415, 3383, 50615, 3676, 389816, 115330, 9002, 9953, 79602, 55501, 23400, 2852, 201164, 27090, 79751, 5729, 5790, 167127, 79071, 933, 90550, 7462, 151194, 54982, 6720, 112616, 23596	89	1097	3929
GOTERM_CC_FAT	GO:0005887~integral to plasma membrane	9	6.87023	0.0311212	32.1059	2.39346	29121, 3676, 9002, 933, 9953, 2852, 3383, 23596, 9415	89	166	3929
GOTERM_CC_FAT	GO:0031226~intrinsic to plasma membrane	9	6.87023	0.0351743	35.5038	2.33714	29121, 3676, 9002, 933, 9953, 2852, 3383, 23596, 9415	89	170	3929
Category	Term	Count	%	PValue	FDR	Fold Enrichment	Genes	List Total	Pop Hits	Pop Total
GOTERM_MF_FAT	GO:0005070~SH3/SH2 adaptor activity	5	3.81679	0.000524661	0.682386	12.479	84941, 29760, 10044, 393, 10750	98	17	4158
GOTERM_MF_FAT	GO:0060090~molecular adaptor activity	5	3.81679	0.00147442	1.90673	9.64286	84941, 29760, 10044, 393, 10750	98	22	4158
GOTERM_MF_FAT	GO:0030674~protein binding, bridging	5	3.81679	0.00280555	3.59929	8.15934	84941, 29760, 10044, 393, 10750	98	26	4158
GOTERM_MF_FAT	GO:0030695~GTPase regulator activity	7	5.34351	0.0407075	41.8555	2.72477	26086, 23370, 374403, 10044, 10235, 393, 6004	98	109	4158
GOTERM_MF_FAT	GO:0005085~guanyl-nucleotide exchange factor activity	4	3.05344	0.0437068	44.1833	4.9916	23370, 10044, 10235, 393	98	34	4158
GOTERM_MF_FAT	GO:0001584~rhodopsin-like receptor activity	2	1.52672	0.0461183	45.9921	42.4286	115330, 23596	98	2	4158
GOTERM_MF_FAT	GO:0060589~nucleoside-triphosphatase regulator activity	7	5.34351	0.0489064	48.0159	2.60526	26086, 23370, 374403, 10044, 10235, 393, 6004	98	114	4158
Category	Term	Count	%	Pvalue <0.1	FDR	Fold Enrichment	Genes	List Total	Pop Hits	Pop Total
KEGG_PATHWAY	hsa04662:B cell receptor signaling pathway	4	3.05344	0.0572135	45.746	4.3697	29760, 933, 3551, 5533	38	41	1702
KEGG_PATHWAY	hsa04514:Cell adhesion molecules (CAMs)	3	2.29008	0.0683592	52.046	6.71842	3676, 933, 3383	38	20	1702
KEGG_PATHWAY	hsa04062:Chemokine signaling pathway	4	3.05344	0.0837461	59.6582	3.73246	1445, 10235, 3551, 156	38	48	1702
Category	Term	Count	%	Pvalue <0.1	FDR	Fold Enrichment	Genes	List Total	Pop Hits	Pop Total
REACTOME_PATHWAY	REACT_13552:Integrin cell surface interactions	5	3.81679	0.000245066	0.218369	14.3125	3676, 1445, 10235, 3386, 3383	30	16	1374
REACTOME_PATHWAY	REACT_15295:Opioid Signalling	4	3.05344	0.00871298	7.50856	8.72381	5142, 5499, 156, 5533	30	21	1374
REACTOME_PATHWAY	REACT_14797:Signaling by GPCR	4	3.05344	0.0194316	16.0562	6.54286	5729, 9002, 2852, 23596	30	28	1374
REACTOME_PATHWAY	REACT_6900:Signaling in Immune system	5	3.81679	0.0466224	34.6782	3.4697	3676, 1445, 3386, 3551, 3383	30	66	1374
Category	Term	Count	%	Pvalue <0.1	FDR	Fold Enrichment	Genes	List Total	Pop Hits	Pop Total
BIOCARTA	h_monocytePathway:Monocyte and its Surface Molecules	2	1.52672	0.0557866	42.6109	33.2941	3676, 3383	17	2	566
BIOCARTA	h_lymphocytePathway:Adhesion Molecules on Lymphocyte	2	1.52672	0.0557866	42.6109	33.2941	3676, 3383	17	2	566
BIOCARTA	h_LairPathway:Cells and Molecules involved in local acute inflammatory response	2	1.52672	0.0825728	56.5571	22.1961	3676, 3383	17	3	566
BIOCARTA	h_lympathway:Adhesion and Diapedesis of Lymphocytes	2	1.52672	0.0825728	56.5571	22.1961	3676, 3383	17	3	566
Category	Term	Count	%	PValue	FDR	Fold Enrichment	Genes	List Total	Pop Hits	Pop Total
SP_PIR_KEYWORDS	receptor	14	10.687	3.52359e-05	0.0441555	4.02506	29121, 5729, 84636, 202018, 3903, 3904, 156, 50615, 3676, 115330, 9002, 79602, 2852, 23596	129	159	5897
SP_PIR_KEYWORDS	cell membrane	18	13.7405	3.98199e-05	0.0498986	3.16476	26086, 29121, 1445, 5729, 29760, 10235, 84636, 3903, 933, 3386, 7416, 51655, 7462, 115330, 9002, 6641, 23048, 2852	129	260	5897
SP_PIR_KEYWORDS	disulfide bond	18	13.7405	4.39058e-05	0.0550175	3.1406	29121, 27090, 5729, 81621, 84636, 3903, 933, 3386, 3904, 5052, 3383, 50615, 3676, 3543, 9002, 9953, 2852, 23596	129	262	5897
SP_PIR_KEYWORDS	membrane	50	38.1679	0.000150424	0.188377	1.63028	29121, 26086, 84636, 202018, 200734, 3386, 3383, 9415, 50615, 3676, 25865, 115330, 9002, 79602, 55501, 23400, 2852, 23138, 201164, 79751, 10235, 5790, 933, 3551, 9685, 10044, 79720, 3903, 7416, 25777, 51655, 389816, 6641, 9953, 1445, 27090, 5729, 29760, 167127, 79071, 90550, 7462, 6389, 151194, 54982, 10287, 6720, 23048, 112616, 23596	129	1402	5897
SP_PIR_KEYWORDS	Immunoglobulin domain	7	5.34351	0.00019485	0.24395	7.99981	3543, 81621, 3903, 933, 3386, 3904, 3383	129	40	5897
SP_PIR_KEYWORDS	SH2 domain	6	4.58015	0.00111236	1.38532	7.41295	84941, 1445, 29760, 10044, 400581, 10750	129	37	5897
SP_PIR_KEYWORDS	g-protein coupled receptor	6	4.58015	0.00159415	1.97984	6.85698	5729, 84636, 115330, 9002, 2852, 23596	129	40	5897
SP_PIR_KEYWORDS	sh3 domain	6	4.58015	0.00245525	3.0342	6.23362	1445, 393, 400581, 84959, 23048, 10750	129	44	5897
SP_PIR_KEYWORDS	transducer	6	4.58015	0.00511862	6.22964	5.2746	5729, 84636, 115330, 9002, 2852, 23596	129	52	5897
SP_PIR_KEYWORDS	transmembrane	34	25.9542	0.00628478	7.59803	1.5652	29121, 84636, 202018, 3903, 3386, 25777, 7416, 9415, 3383, 50615, 3676, 389816, 115330, 9002, 9953, 79602, 55501, 23400, 2852, 201164, 27090, 79751, 5729, 5790, 167127, 79071, 933, 90550, 7462, 151194, 54982, 6720, 112616, 23596	129	993	5897
SP_PIR_KEYWORDS	glycoprotein	21	16.0305	0.00673195	8.11784	1.87495	29121, 201164, 27090, 5729, 81621, 84636, 167127, 3903, 933, 3386, 25777, 3383, 50615, 3676, 115330, 9002, 9953, 55501, 27348, 2852, 23596	129	512	5897
SP_PIR_KEYWORDS	B-cell	3	2.29008	0.0120156	14.0595	17.1424	3543, 933, 5450	129	8	5897
SP_PIR_KEYWORDS	polymorphism	83	63.3588	0.0285094	30.4086	1.1603	29121, 7494, 23235, 84636, 648, 202018, 84959, 3386, 156, 5533, 3383, 50615, 3676, 23370, 25865, 80183, 9002, 79602, 55501, 605, 23400, 2852, 201164, 2067, 64780, 5790, 10235, 81621, 933, 3551, 5982, 839, 9686, 3543, 4597, 79896, 57597, 7128, 23412, 7171, 5450, 5142, 55762, 865, 10044, 2356, 9535, 51203, 3903, 23152, 25777, 3904, 10327, 27143, 1025, 57224, 84700, 3399, 22809, 10801, 6004, 1445, 2…	129	3270	5897
SP_PIR_KEYWORDS	chromosomal rearrangement	7	5.34351	0.0306141	32.2748	2.93571	694, 865, 8028, 23048, 5450, 605, 10801	129	109	5897
SP_PIR_KEYWORDS	cell adhesion	4	3.05344	0.031337	32.9051	5.71415	3676, 933, 3386, 3383	129	32	5897
SP_PIR_KEYWORDS	palmitate	4	3.05344	0.0394668	39.6314	5.22436	10287, 6004, 23596, 7462	129	35	5897
SP_PIR_KEYWORDS	cytoplasmic vesicle	5	3.81679	0.0406103	40.5261	3.80943	9685, 6720, 200734, 23048, 23138	129	60	5897
Both enhancer- and transcript-centric genes
			of 176 genes:
Category	Term	Count	%	PValue	FDR	Fold Enrichment	Genes	List Total	Pop Hits	Pop Total
GOTERM_BP_FAT	GO:0007186~G-protein coupled receptor protein signaling pathway	11	6.25	6.06911e-05	0.0982539	4.90286	135, 5729, 84636, 10287, 115330, 9002, 156, 51655, 83855, 2852, 23596	133	75	4446
GOTERM_BP_FAT	GO:0007166~cell surface receptor linked signal transduction	20	11.3636	0.000118499	0.191755	2.67429	29121, 135, 6468, 5729, 23235, 84636, 6711, 156, 51655, 7462, 3676, 6693, 8835, 10287, 115330, 9002, 7091, 83855, 2852, 23596	133	250	4446
GOTERM_BP_FAT	GO:0001775~cell activation	11	6.25	0.000528592	0.852711	3.79087	50615, 135, 2067, 84941, 3676, 81575, 6693, 29760, 865, 3383, 7462	133	97	4446
GOTERM_BP_FAT	GO:0008203~cholesterol metabolic process	6	3.40909	0.00167643	2.68094	6.68571	3638, 4047, 54982, 6713, 4597, 6720	133	30	4446
GOTERM_BP_FAT	GO:0046649~lymphocyte activation	9	5.11364	0.00168367	2.69236	3.95865	50615, 2067, 84941, 3676, 6693, 29760, 865, 3383, 7462	133	76	4446
GOTERM_BP_FAT	GO:0016125~sterol metabolic process	6	3.40909	0.00297663	4.71362	5.89916	3638, 4047, 54982, 6713, 4597, 6720	133	34	4446
GOTERM_BP_FAT	GO:0045321~leukocyte activation	9	5.11364	0.00343685	5.42351	3.5395	50615, 2067, 84941, 3676, 6693, 29760, 865, 3383, 7462	133	85	4446
GOTERM_BP_FAT	GO:0006955~immune response	11	6.25	0.00818345	12.4613	2.62653	7494, 2067, 6693, 29760, 3543, 3903, 5450, 6890, 5052, 3383, 7462	133	140	4446
GOTERM_BP_FAT	GO:0008202~steroid metabolic process	6	3.40909	0.0168264	24.0314	3.93277	3638, 4047, 54982, 6713, 4597, 6720	133	51	4446
GOTERM_BP_FAT	GO:0007242~intracellular signaling cascade	20	11.3636	0.0171025	24.3762	1.74562	135, 8437, 1445, 29760, 10235, 393, 10044, 23235, 200734, 7153, 3551, 51655, 7462, 8835, 25865, 10287, 9002, 79602, 3428, 10750	133	383	4446
GOTERM_BP_FAT	GO:0042981~regulation of apoptosis	17	9.65909	0.0218422	30.0711	1.81561	135, 22822, 2067, 694, 393, 7153, 3551, 839, 5052, 5533, 23370, 6693, 8835, 7128, 3399, 3428, 22809	133	313	4446
GOTERM_BP_FAT	GO:0043067~regulation of programmed cell death	17	9.65909	0.0230447	31.4505	1.80408	135, 22822, 2067, 694, 393, 7153, 3551, 839, 5052, 5533, 23370, 6693, 8835, 7128, 3399, 3428, 22809	133	315	4446
GOTERM_BP_FAT	GO:0010941~regulation of cell death	17	9.65909	0.0236646	32.1516	1.79837	135, 22822, 2067, 694, 393, 7153, 3551, 839, 5052, 5533, 23370, 6693, 8835, 7128, 3399, 3428, 22809	133	316	4446
GOTERM_BP_FAT	GO:0043068~positive regulation of programmed cell death	11	6.25	0.029641	38.5744	2.15038	135, 22822, 23370, 6693, 393, 3399, 3428, 7153, 839, 5052, 5533	133	171	4446
GOTERM_BP_FAT	GO:0043065~positive regulation of apoptosis	11	6.25	0.029641	38.5744	2.15038	135, 22822, 23370, 6693, 393, 3399, 3428, 7153, 839, 5052, 5533	133	171	4446
GOTERM_BP_FAT	GO:0010942~positive regulation of cell death	11	6.25	0.0306975	39.6487	2.13787	135, 22822, 23370, 6693, 393, 3399, 3428, 7153, 839, 5052, 5533	133	172	4446
GOTERM_BP_FAT	GO:0008277~regulation of G-protein coupled receptor protein signaling pathway	3	1.70455	0.0336788	42.5859	10.0286	26086, 156, 6004	133	10	4446
GOTERM_BP_FAT	GO:0002443~leukocyte mediated immunity	4	2.27273	0.0365248	45.2642	5.34857	2067, 5052, 3383, 7462	133	25	4446
GOTERM_BP_FAT	GO:0005976~polysaccharide metabolic process	4	2.27273	0.0445113	52.1678	4.95238	2632, 54982, 5499, 55501	133	27	4446
Category	Term	Count	%	PValue	FDR	Fold Enrichment	Genes	List Total	Pop Hits	Pop Total
GOTERM_CC_FAT	GO:0005886~plasma membrane	36	20.4545	2.27934e-05	0.0290529	2.03224	29121, 26086, 135, 84636, 3903, 200734, 3386, 7416, 6890, 10327, 156, 51655, 9415, 3383, 3676, 115330, 9002, 6641, 9953, 10801, 2852, 1445, 29760, 5729, 5790, 393, 10235, 6711, 933, 7462, 162, 81575, 6693, 10287, 23048, 23596	116	600	3929
GOTERM_CC_FAT	GO:0044459~plasma membrane part	25	14.2045	0.000173652	0.221145	2.24012	26086, 29121, 135, 200734, 6890, 10327, 156, 51655, 3383, 9415, 3676, 9002, 9953, 6641, 2852, 1445, 10235, 393, 6711, 933, 162, 6693, 10287, 23048, 23596	116	378	3929
GOTERM_CC_FAT	GO:0005576~extracellular region	14	7.95455	0.00273467	3.43068	2.54941	51237, 81621, 414332, 3386, 3904, 138307, 3383, 2589, 6693, 81575, 3543, 55009, 9002, 112616	116	186	3929
GOTERM_CC_FAT	GO:0005887~integral to plasma membrane	12	6.81818	0.00860891	10.4364	2.44848	29121, 135, 3676, 6693, 9002, 933, 9953, 6890, 2852, 3383, 23596, 9415	116	166	3929
GOTERM_CC_FAT	GO:0016021~integral to membrane	45	25.5682	0.00948243	11.4372	1.38941	29121, 135, 84636, 23200, 202018, 3903, 3386, 7416, 25777, 6890, 9415, 3383, 50615, 3676, 161198, 3638, 389816, 115330, 9002, 79602, 9953, 79603, 55501, 23400, 2852, 201164, 27090, 79751, 5729, 5790, 6713, 167127, 79071, 933, 90550, 375387, 7462, 2589, 81575, 6693, 151194, 54982, 6720, 112616, 23596	116	1097	3929
GOTERM_CC_FAT	GO:0031224~intrinsic to membrane	46	26.1364	0.00992734	11.943	1.37759	29121, 135, 84636, 23200, 202018, 3903, 3386, 7416, 25777, 6890, 9415, 3383, 50615, 3676, 161198, 3638, 389816, 115330, 9002, 79602, 9953, 79603, 55501, 23400, 2852, 201164, 27090, 79751, 5729, 5790, 6713, 167127, 79071, 933, 90550, 375387, 7462, 2589, 81575, 6693, 151194, 54982, 10287, 6720, 112616, 23596	116	1131	3929
GOTERM_CC_FAT	GO:0031226~intrinsic to plasma membrane	12	6.81818	0.0102216	12.276	2.39087	29121, 135, 3676, 6693, 9002, 933, 9953, 6890, 2852, 3383, 23596, 9415	116	170	3929
GOTERM_CC_FAT	GO:0009897~external side of plasma membrane	4	2.27273	0.0351663	36.642	5.41931	3676, 6693, 933, 3383	116	25	3929
Category	Term	Count	%	PValue	FDR	Fold Enrichment	Genes	List Total	Pop Hits	Pop Total
GOTERM_MF_FAT	GO:0005070~SH3/SH2 adaptor activity	6	3.40909	0.000113187	0.151975	11.4651	84941, 8835, 29760, 10044, 393, 10750	128	17	4158
GOTERM_MF_FAT	GO:0060090~molecular adaptor activity	6	3.40909	0.000425945	0.570803	8.85938	84941, 8835, 29760, 10044, 393, 10750	128	22	4158
GOTERM_MF_FAT	GO:0030674~protein binding, bridging	6	3.40909	0.000964536	1.28824	7.49639	84941, 8835, 29760, 10044, 393, 10750	128	26	4158
GOTERM_MF_FAT	GO:0046983~protein dimerization activity	12	6.81818	0.0213816	25.2041	2.15366	135, 7494, 23590, 54982, 4597, 60468, 9189, 3551, 7153, 79602, 6890, 22809	128	181	4158
GOTERM_MF_FAT	GO:0008092~cytoskeletal protein binding	10	5.68182	0.0222127	26.0531	2.38856	135, 84700, 9535, 114793, 51203, 6711, 7171, 6641, 25777, 3799	128	136	4158
GOTERM_MF_FAT	GO:0030695~GTPase regulator activity	8	4.54545	0.0477816	48.204	2.38417	26086, 8437, 23370, 374403, 10044, 10235, 393, 6004	128	109	4158
Category	Term	Count	%	Pvalue <0.1	FDR	Fold Enrichment	Genes	List Total	Pop Hits	Pop Total
KEGG_PATHWAY	hsa04514:Cell adhesion molecules (CAMs)	4	2.27273	0.0171341	16.6684	6.94694	3676, 6693, 933, 3383	49	20	1702
KEGG_PATHWAY	hsa04080:Neuroactive ligand-receptor interaction	3	1.70455	0.0647551	50.6548	6.94694	135, 5729, 9002	49	15	1702
Category	Term	Count	%	Pvalue <0.1	FDR	Fold Enrichment	Genes	List Total	Pop Hits	Pop Total
REACTOME_PATHWAY	REACT_13552:Integrin cell surface interactions	5	2.84091	0.000714524	0.651821	11.0096	3676, 1445, 10235, 3386, 3383	39	16	1374
REACTOME_PATHWAY	REACT_14797:Signaling by GPCR	5	2.84091	0.00632689	5.6415	6.29121	135, 5729, 9002, 2852, 23596	39	28	1374
REACTOME_PATHWAY	REACT_15295:Opioid Signalling	4	2.27273	0.0184077	15.632	6.71062	5142, 5499, 156, 5533	39	21	1374
REACTOME_PATHWAY	REACT_6900:Signaling in Immune system	6	3.40909	0.0321601	25.8492	3.2028	3676, 1445, 6693, 3386, 3551, 3383	39	66	1374
REACTOME_PATHWAY	REACT_602:Metabolism of lipids and lipoproteins	5	2.84091	0.0352859	28.0116	3.82943	4047, 6713, 4597, 5499, 54677	39	46	1374
REACTOME_PATHWAY	REACT_604:Hemostasis	5	2.84091	0.0840098	55.1938	2.88777	3676, 1445, 6693, 10235, 9002	39	61	1374
Category	Term	Count	%	PValue	FDR	Fold Enrichment	Genes	List Total	Pop Hits	Pop Total
SP_PIR_KEYWORDS	disulfide bond	23	13.0682	6.68117e-06	0.00855326	2.97515	29121, 135, 27090, 5729, 81621, 84636, 3903, 414332, 933, 3386, 3904, 138307, 5052, 3383, 50615, 2589, 3676, 161198, 3543, 9002, 9953, 2852, 23596	174	262	5897
SP_PIR_KEYWORDS	cell membrane	21	11.9318	6.43121e-05	0.0823045	2.73733	26086, 29121, 135, 1445, 5729, 29760, 10235, 84636, 6711, 3903, 933, 3386, 7416, 51655, 7462, 81575, 115330, 9002, 6641, 23048, 2852	174	260	5897
SP_PIR_KEYWORDS	membrane	64	36.3636	0.000103564	0.132508	1.54708	29121, 26086, 84636, 23200, 202018, 200734, 3386, 9415, 3383, 50615, 3676, 161198, 3638, 25865, 115330, 9002, 79602, 55501, 79603, 23400, 2852, 23138, 201164, 79751, 5790, 10235, 933, 3551, 9685, 162, 6693, 135, 10044, 79720, 3903, 7416, 25777, 6890, 51655, 389816, 9953, 6641, 1445, 22822, 27090, 5729, 29760, 6713, 6711, 167127, 79071, 375387, 90550, 7462, 2589, 81575, 6389, 151194, 54982, 10287,…	174	1402	5897
SP_PIR_KEYWORDS	receptor	15	8.52273	0.00021266	0.271918	3.19725	29121, 135, 5729, 84636, 202018, 3903, 3904, 156, 50615, 3676, 115330, 9002, 79602, 2852, 23596	174	159	5897
SP_PIR_KEYWORDS	SH2 domain	7	3.97727	0.000637889	0.813593	6.41177	84941, 1445, 8835, 29760, 10044, 400581, 10750	174	37	5897
SP_PIR_KEYWORDS	glycoprotein	29	16.4773	0.000846911	1.07886	1.9196	29121, 135, 84636, 3903, 3386, 25777, 3383, 50615, 3676, 161198, 115330, 9002, 9953, 55501, 2852, 201164, 27090, 5729, 81621, 167127, 6711, 414332, 933, 138307, 375387, 2589, 6693, 27348, 23596	174	512	5897
SP_PIR_KEYWORDS	g-protein coupled receptor	7	3.97727	0.000979249	1.24647	5.93089	135, 5729, 84636, 115330, 9002, 2852, 23596	174	40	5897
SP_PIR_KEYWORDS	Immunoglobulin domain	7	3.97727	0.000979249	1.24647	5.93089	3543, 81621, 3903, 933, 3386, 3904, 3383	174	40	5897
SP_PIR_KEYWORDS	transmembrane	45	25.5682	0.00234362	2.95928	1.53584	29121, 135, 84636, 23200, 202018, 3903, 3386, 7416, 25777, 6890, 9415, 3383, 50615, 3676, 161198, 3638, 389816, 115330, 9002, 79602, 9953, 79603, 55501, 23400, 2852, 201164, 27090, 79751, 5729, 5790, 6713, 167127, 79071, 933, 90550, 375387, 7462, 2589, 81575, 6693, 151194, 54982, 6720, 112616, 23596	174	993	5897
SP_PIR_KEYWORDS	transducer	7	3.97727	0.00388587	4.86239	4.56222	135, 5729, 84636, 115330, 9002, 2852, 23596	174	52	5897
SP_PIR_KEYWORDS	cytoplasmic vesicle	7	3.97727	0.00788315	9.63601	3.95393	9685, 22822, 162, 6720, 200734, 23048, 23138	174	60	5897
SP_PIR_KEYWORDS	sh3 domain	6	3.40909	0.00882491	10.728	4.62147	1445, 393, 400581, 84959, 23048, 10750	174	44	5897
SP_PIR_KEYWORDS	signal	19	10.7955	0.0192496	22.03	1.7739	51237, 81621, 167127, 3903, 414332, 933, 3386, 3904, 138307, 375387, 3383, 50615, 3676, 161198, 6693, 3543, 389816, 9002, 27348	174	363	5897
SP_PIR_KEYWORDS	B-cell	3	1.70455	0.0213285	24.1197	12.7091	3543, 933, 5450	174	8	5897
SP_PIR_KEYWORDS	Lectin	4	2.27273	0.0223779	25.1548	6.45539	29121, 2589, 161198, 933	174	21	5897
SP_PIR_KEYWORDS	Signal transduction inhibitor	3	1.70455	0.0268996	29.4678	11.2969	8835, 10287, 6004	174	9	5897
SP_PIR_KEYWORDS	polymorphism	109	61.9318	0.0356151	37.1414	1.12969	157285, 29121, 7494, 84930, 4047, 156, 5533, 50615, 3676, 27132, 80183, 79602, 79603, 605, 2852, 81621, 933, 3551, 6693, 3543, 4597, 79896, 7171, 5450, 5142, 8437, 51020, 55729, 51203, 25777, 6890, 10327, 57224, 3399, 10801, 6004, 1445, 2632, 694, 393, 5052, 27300, 2589, 6389, 7324, 60468, 64793, 3428, 348738, 54677, 23596, 23235, 84636, 648, 202018, 6596, 84959, 3386, 9701, 3383, 23370, 3638, 88…	174	3270	5897
SP_PIR_KEYWORDS	lipid synthesis	5	2.84091	0.0449044	44.4673	3.68378	4047, 4597, 79071, 79603, 9415	174	46	5897

## Sheet: Table S6. GREAT
Table S6. Gene ontology analyses of E/R-regulated genes and eRNA regions.
Sheet 2: genomic regions enrichment of annotation tool (GREAT) was used to associate E/R-regulated enhancers to genes and pathways. Both whole genome background and GRO-seq background were used separately and the results with binomial FDR < 0.005 are shown.
Whole genome background. Binomial FDR<0.005.
GO Biological Process	Species assembly: hg19	Association rule: Basal+extension: 5000 bp upstream, 1000 bp downstream, 1000000 bp max extension, curated regulatory domains included						# GREAT version 3,0,0
GO Biological Process # Term Name	Binom Rank	Binom Raw P-Value	Binom Bonferroni P-Value	Binom FDR Q-Val	Binom Fold Enrichment	Binom Observed Region Hits	Binom Region Set Coverage	Hyper Rank	Hyper Bonferroni P-Value	Hyper FDR Q-Val	Hyper Fold Enrichment	Hyper Observed Gene Hits	Hyper Total Genes	Hyper Gene Set Coverage
regulation of immune response	3	4.66521e-11	4.87048e-07	1.62349e-07	2.14518	85	0.133438	6	0.00316802	0.000528004	1.98821	60	698	0.0769231
leukocyte cell-cell adhesion	7	4.61192e-09	4.81485e-05	6.87836e-06	6.73623	16	0.0251177	115	1	0.034156	4.40562	8	42	0.0102564
activation of immune response	11	5.23178e-08	0.000546198	4.96543e-05	2.40796	47	0.0737834	10	0.0153105	0.00153105	2.40932	35	336	0.0448718
immune response-activating signal transduction	12	7.02034e-08	0.000732923	6.10769e-05	2.47019	44	0.0690738	12	0.0285165	0.00237638	2.49831	31	287	0.0397436
positive regulation of immune response	15	9.87777e-08	0.00103124	6.87493e-05	2.21715	53	0.0832025	28	0.156249	0.00558031	2.09267	38	420	0.048718
antigen receptor-mediated signaling pathway	16	1.12666e-07	0.00117623	7.35144e-05	3.40889	26	0.0408163	33	0.233775	0.00708409	3.33398	16	111	0.0205128
cell aging	22	2.93602e-07	0.00306521	0.000139328	4.18568	19	0.0298273	120	1	0.0388435	3.55838	10	65	0.0128205
immune response-regulating signaling pathway	23	3.29797e-07	0.00344308	0.000149699	2.0957	55	0.0863422	21	0.0933	0.00444286	2.16656	37	395	0.0474359
B cell receptor signaling pathway	45	1.84024e-06	0.0192122	0.000426937	5.28686	13	0.0204082	106	1	0.0286594	5.22279	7	31	0.00897436
activation of MAPK activity	46	1.85474e-06	0.0193635	0.000420946	2.7312	29	0.0455259	94	1	0.0206753	2.80357	16	132	0.0205128
positive regulation of B cell activation	47	1.99527e-06	0.0208306	0.000443205	4.03362	17	0.0266876	34	0.240674	0.00707864	4.54329	11	56	0.0141026
homeostasis of number of cells	52	3.11051e-06	0.0324737	0.000624494	2.60566	30	0.0470958	140	1	0.0492956	2.42717	17	162	0.0217949
cellular response to interleukin-1	53	3.24935e-06	0.0339233	0.000640061	4.64881	14	0.021978	22	0.0939937	0.00427244	5.50702	10	42	0.0128205
positive regulation of B cell proliferation	54	3.48304e-06	0.036363	0.000673388	4.62026	14	0.021978	74	1	0.0138302	5.28674	8	35	0.0102564
aging	62	5.67513e-06	0.0592483	0.000955618	2.39781	33	0.0518053	90	1	0.0206943	2.47374	20	187	0.025641
response to hexose stimulus	70	8.41225e-06	0.0878238	0.00125463	2.98532	22	0.0345369	48	0.41568	0.00866	3.33598	15	104	0.0192308
immune response-activating cell surface receptor signaling pathway	73	9.24798e-06	0.0965489	0.00132259	2.55709	28	0.043956	127	1	0.0453724	2.39271	18	174	0.0230769
positive regulation of MAP kinase activity	74	9.33706e-06	0.0974789	0.00131728	2.27121	35	0.0549451	41	0.317043	0.00773275	2.65025	22	192	0.0282051
response to monosaccharide stimulus	86	1.47059e-05	0.15353	0.00178523	2.87702	22	0.0345369	58	0.650064	0.011208	3.21243	15	108	0.0192308
regulation of B cell activation	88	1.58185e-05	0.165145	0.00187665	3.05025	20	0.0313972	67	0.925563	0.0138144	3.45613	13	87	0.0166667
response to glucose stimulus	89	1.64156e-05	0.171379	0.0019256	2.94386	21	0.032967	68	0.928569	0.0136554	3.27084	14	99	0.0179487
response to carbohydrate stimulus	95	2.25293e-05	0.235206	0.00247586	2.65148	24	0.0376766	40	0.315125	0.00787813	3.12065	17	126	0.0217949
artery morphogenesis	106	3.51804e-05	0.367284	0.00346494	3.21766	17	0.0266876	42	0.330347	0.00786541	4.81864	10	48	0.0128205
Mouse phenotype	Species assembly: hg19	Association rule: Basal+extension: 5000 bp upstream, 1000 bp downstream, 1000000 bp max extension, curated regulatory domains included
# Term Name	Binom Rank	Binom Raw P-Value	Binom Bonferroni P-Value	Binom FDR Q-Val	Binom Fold Enrichment	Binom Observed Region Hits	Binom Region Set Coverage	Hyper Rank	Hyper Bonferroni P-Value	Hyper FDR Q-Val	Hyper Fold Enrichment	Hyper Observed Gene Hits	Hyper Total Genes	Hyper Gene Set Coverage
abnormal professional antigen presenting cell physiology	1	1.55578e-16	1.23186e-12	1.23186e-12	2.25193	117	0.183673	8	7.12337e-05	8.90422e-06	1.98935	75	872	0.0961538
abnormal bone marrow cell morphology/development	3	1.1258e-15	8.91409e-12	2.97136e-12	2.01104	139	0.21821	12	0.000172511	1.43759e-05	1.82493	89	1128	0.114103
abnormal T cell morphology	9	7.2594e-15	5.748e-11	6.38666e-12	2.14103	116	0.182104	22	0.000291267	1.32394e-05	1.93399	74	885	0.0948718
abnormal myeloblast morphology/development	10	9.50322e-15	7.52465e-11	7.52465e-12	2.13259	116	0.182104	5	3.20761e-05	6.41522e-06	2.02653	75	856	0.0961538
abnormal B cell morphology	13	1.70988e-14	1.35389e-10	1.04145e-11	2.35936	94	0.147567	16	0.000200741	1.25463e-05	2.16722	58	619	0.074359
abnormal mononuclear cell differentiation	16	2.64017e-14	2.09049e-10	1.30656e-11	2.15656	110	0.172684	6	3.31489e-05	5.52481e-06	2.07348	71	792	0.0910256
abnormal lymphopoiesis	19	4.66625e-14	3.69474e-10	1.9446e-11	2.14737	109	0.171115	7	5.63079e-05	8.04398e-06	2.05988	70	786	0.0897436
abnormal lymphocyte physiology	22	2.06235e-13	1.63297e-09	7.4226e-11	2.02861	117	0.183673	46	0.00668708	0.000145371	1.79432	73	941	0.0935897
abnormal leukopoiesis	23	4.05996e-13	3.21467e-09	1.39768e-10	2.04028	113	0.177394	15	0.000196402	1.30935e-05	1.96332	73	860	0.0935897
abnormal B cell differentiation	25	1.94663e-12	1.54134e-08	6.16538e-10	2.54555	70	0.10989	14	0.00017581	1.25578e-05	2.50048	44	407	0.0564103
abnormal T cell number	26	2.67924e-12	2.12142e-08	8.15933e-10	2.12532	97	0.152276	21	0.00026294	1.25209e-05	2.05881	64	719	0.0820513
abnormal B cell physiology	27	3.28005e-12	2.59715e-08	9.61906e-10	2.30478	82	0.128728	63	0.0231029	0.000366713	1.99049	50	581	0.0641026
abnormal B cell number	33	4.33325e-11	3.43106e-07	1.03972e-08	2.25651	77	0.120879	30	0.00177614	5.92047e-05	2.19216	49	517	0.0628205
abnormal innate immunity	34	5.51009e-11	4.36289e-07	1.2832e-08	2.24473	77	0.120879	81	0.0990448	0.00122278	1.91747	48	579	0.0615385
abnormal cytokine secretion	36	1.46698e-10	1.16156e-06	3.22654e-08	2.19692	77	0.120879	116	0.688905	0.00593884	1.78797	47	608	0.0602564
abnormal B cell proliferation	37	1.73652e-10	1.37497e-06	3.71615e-08	3.44813	37	0.0580848	47	0.00696881	0.000148272	3.1855	23	167	0.0294872
abnormal mature B cell morphology	40	6.73196e-10	5.33036e-06	1.33259e-07	2.61326	52	0.0816327	42	0.00345514	8.22652e-05	2.57837	34	305	0.0435897
abnormal B cell activation	43	9.40657e-10	7.44812e-06	1.73212e-07	3.23721	37	0.0580848	65	0.031317	0.0004818	2.92296	23	182	0.0294872
abnormal CD4-positive T cell morphology	45	1.60714e-09	1.27254e-05	2.82786e-07	2.31246	62	0.0973312	64	0.0274502	0.000428909	2.17689	40	425	0.0512821
abnormal effector T cell morphology	46	1.62106e-09	1.28356e-05	2.79034e-07	2.14673	72	0.11303	56	0.0166001	0.00029643	2.0667	47	526	0.0602564
abnormal T cell physiology	47	1.73491e-09	1.3737e-05	2.92277e-07	2.06534	78	0.122449	89	0.184601	0.00207417	1.85794	49	610	0.0628205
abnormal macrophage physiology	48	2.21922e-09	1.75718e-05	3.66079e-07	2.44332	55	0.0863422	140	1	0.0161857	1.93755	32	382	0.0410256
decreased T cell number	49	2.56798e-09	2.03333e-05	4.14965e-07	2.08328	75	0.117739	43	0.00382419	8.89348e-05	2.09894	51	562	0.0653846
abnormal single-positive T cell number	50	2.60157e-09	2.05992e-05	4.11984e-07	2.22918	65	0.102041	76	0.0574559	0.000755998	2.08879	41	454	0.0525641
decreased B cell number	51	2.68337e-09	2.12469e-05	4.16606e-07	2.26243	63	0.0989011	49	0.0106504	0.000217355	2.28947	39	394	0.05
decreased B cell proliferation	54	4.03622e-09	3.19588e-05	5.9183e-07	3.79117	28	0.043956	80	0.0980123	0.00122515	3.49124	16	106	0.0205128
increased lymphocyte cell number	55	4.26338e-09	3.37575e-05	6.13772e-07	2.04612	76	0.119309	68	0.0409828	0.000602688	1.95021	50	593	0.0641026
edema	56	4.86729e-09	3.85392e-05	6.88199e-07	2.02797	77	0.120879	4	2.59119e-05	6.47797e-06	2.56388	47	424	0.0602564
abnormal T cell differentiation	58	7.83197e-09	6.20135e-05	1.0692e-06	2.00522	77	0.120879	44	0.00474877	0.000107927	2.06655	52	582	0.0666667
abnormal immunoglobulin level	59	9.15345e-09	7.2477e-05	1.22842e-06	2.17219	64	0.100471	90	0.185528	0.00206143	1.98807	41	477	0.0525641
abnormal CD8-positive T cell morphology	60	1.37692e-08	0.000109024	1.81707e-06	2.33665	54	0.0847724	59	0.0199026	0.000337332	2.35329	35	344	0.0448718
decreased single-positive T cell number	61	1.40902e-08	0.000111566	1.82895e-06	2.40675	51	0.0800628	54	0.0143376	0.000265511	2.46217	33	310	0.0423077
decreased susceptibility to autoimmune disorder	62	1.52695e-08	0.000120904	1.95006e-06	3.37183	30	0.0470958	209	1	0.037834	2.27503	18	183	0.0230769
abnormal CD8-positive T cell number	63	1.55075e-08	0.000122788	1.94902e-06	2.39942	51	0.0800628	58	0.0177252	0.000305606	2.43857	33	313	0.0423077
increased T cell number	64	1.67382e-08	0.000132533	2.07082e-06	2.24029	58	0.0910518	94	0.222108	0.00236285	2.05719	37	416	0.0474359
abnormal spleen white pulp morphology	65	1.85244e-08	0.000146676	2.25655e-06	2.5253	46	0.0722135	173	1	0.0255051	1.98884	27	314	0.0346154
abnormal marginal zone B cell morphology	69	4.30601e-08	0.00034095	4.94131e-06	3.82936	24	0.0376766	132	1	0.0136994	2.86729	15	121	0.0192308
abnormal CD4-positive T cell number	70	6.37969e-08	0.000505144	7.21634e-06	2.26993	52	0.0816327	121	1	0.00954499	2.01126	32	368	0.0410256
abnormal cell chemotaxis	71	7.40365e-08	0.000586221	8.25663e-06	3.59495	25	0.0392465	146	1	0.0177254	2.77554	15	125	0.0192308
abnormal humoral immune response	72	9.55675e-08	0.000756703	1.05098e-05	2.02171	65	0.102041	114	0.648073	0.00568485	1.86457	42	521	0.0538462
abnormal immature B cell morphology	75	1.91494e-07	0.00151625	2.02166e-05	2.6224	37	0.0580848	51	0.0111395	0.000218422	2.93521	25	197	0.0320513
increased circulating aspartate transaminase level	79	2.33591e-07	0.00184957	2.34123e-05	4.25053	19	0.0298273	204	1	0.0354184	3.25767	10	71	0.0128205
autoimmune response	80	2.67102e-07	0.00211491	2.64364e-05	2.25024	48	0.0753532	155	1	0.0216723	1.91715	31	374	0.0397436
abnormal self tolerance	84	3.89687e-07	0.00308554	3.67326e-05	2.22026	48	0.0753532	160	1	0.0229856	1.90695	31	376	0.0397436
increased B cell number	87	4.27822e-07	0.00338749	3.89367e-05	2.4282	40	0.0627943	98	0.305566	0.00311802	2.33894	27	267	0.0346154
abnormal spleen marginal zone morphology	88	4.29866e-07	0.00340368	3.86782e-05	3.26501	25	0.0392465	172	1	0.0250114	2.55222	16	145	0.0205128
abnormal immune tolerance	89	4.84328e-07	0.00383491	4.30889e-05	2.20306	48	0.0753532	180	1	0.0278482	1.8721	31	383	0.0397436
decreased CD8-positive T cell number	92	5.87737e-07	0.0046537	5.05837e-05	2.46433	38	0.0596546	83	0.102454	0.00123439	2.65602	24	209	0.0307692
decreased CD4-positive T cell number	97	7.22506e-07	0.0057208	5.89773e-05	2.40907	39	0.0612245	118	1	0.00869392	2.30335	24	241	0.0307692
abnormal circulating aspartate transaminase level	99	8.81697e-07	0.00698128	7.05179e-05	3.57491	21	0.032967	226	1	0.0450928	2.92442	11	87	0.0141026
small thymus	102	1.01709e-06	0.00805332	7.89541e-05	2.18762	46	0.0722135	113	0.640458	0.00566777	2.20281	28	294	0.0358974
abnormal interleukin secretion	103	1.09514e-06	0.00867129	8.41873e-05	2.01431	55	0.0863422	169	1	0.0241205	1.81509	35	446	0.0448718
abnormal hepatocyte morphology	107	1.2277e-06	0.00972093	9.08498e-05	2.99586	26	0.0408163	216	1	0.0411413	2.38756	16	155	0.0205128
decreased tumor necrosis factor secretion	112	1.65387e-06	0.0130953	0.000116923	3.5664	20	0.0313972	227	1	0.0450294	2.63757	13	114	0.0166667
altered tumor morphology	114	1.78652e-06	0.0141457	0.000124085	2.62899	31	0.0486656	101	0.344002	0.00340596	2.73722	20	169	0.025641
increased mature B cell number	117	2.05625e-06	0.0162814	0.000139157	2.91071	26	0.0408163	156	1	0.0218342	2.60614	16	142	0.0205128
extramedullary hematopoiesis	118	2.31361e-06	0.0183192	0.000155247	2.82212	27	0.0423862	225	1	0.0452501	2.35715	16	157	0.0205128
decreased mature B cell number	119	2.48722e-06	0.0196938	0.000165494	2.34809	37	0.0580848	93	0.203891	0.00219238	2.4924	25	232	0.0320513
abnormal T cell subpopulation ratio	120	2.8659e-06	0.0226922	0.000189102	4.39516	15	0.0235479	152	1	0.0210456	3.92765	9	53	0.0115385
abnormal thymus size	128	5.08791e-06	0.0402861	0.000314735	2.00164	49	0.0769231	179	1	0.0277222	1.89586	30	366	0.0384615
decreased thymocyte number	131	5.7144e-06	0.0452466	0.000345394	2.47894	31	0.0486656	70	0.0448708	0.000641011	3.03574	21	160	0.0269231
decreased immunoglobulin level	137	6.55998e-06	0.0519419	0.000379138	2.16568	40	0.0627943	149	1	0.0198121	2.04084	27	306	0.0346154
abnormal osteoclast morphology	144	9.09639e-06	0.0720252	0.000500175	2.34228	33	0.0518053	178	1	0.0273951	2.44224	17	161	0.0217949
delayed wound healing	151	1.72163e-05	0.136318	0.000902771	3.76867	15	0.0235479	129	1	0.0121456	3.92025	10	59	0.0128205
increased immature B cell number	152	1.74269e-05	0.137986	0.000907803	3.26357	18	0.0282575	144	1	0.0175486	3.43817	11	74	0.0141026
decreased IgG1 level	154	1.8354e-05	0.145327	0.000943684	2.75675	23	0.0361067	207	1	0.0358002	2.51408	15	138	0.0192308
decreased immature B cell number	165	2.67828e-05	0.212067	0.00128525	2.45438	27	0.0423862	112	0.624821	0.00557875	2.79417	18	149	0.0230769
abnormal double-positive T cell morphology	168	2.72969e-05	0.216137	0.00128653	2.18379	34	0.0533752	133	1	0.014574	2.30248	22	221	0.0282051
decreased fibroblast cell migration	172	3.469e-05	0.274675	0.00159695	3.99141	13	0.0204082	158	1	0.0219732	4.90625	7	33	0.00897436
thymus hypoplasia	180	4.37188e-05	0.346165	0.00192314	2.26026	30	0.0470958	150	1	0.0197668	2.40142	19	183	0.024359
impaired neutrophil chemotaxis	186	4.97284e-05	0.393749	0.00211693	4.13139	12	0.0188383	161	1	0.0229421	3.85492	9	54	0.0115385
decreased double-positive T cell number	194	5.89977e-05	0.467144	0.00240796	2.25879	29	0.0455259	145	1	0.0177895	2.42796	19	181	0.024359
abnormal fibroblast migration	195	5.94294e-05	0.470562	0.00241314	3.7822	13	0.0204082	189	1	0.0320682	1,4,4974	7	36	0.00897436
abnormal vascular endothelial cell morphology	199	6.66021e-05	0.527356	0.00265003	3.05199	17	0.0266876	182	1	0.0280811	3.40139	10	68	0.0128205
abnormal thymus cortex morphology	203	7.43892e-05	0.589014	0.00290155	3.69726	13	0.0204082	131	1	0.0132086	4.24827	9	49	0.0115385
enlarged lung	205	8.51993e-05	0.674608	0.00329077	3.26444	15	0.0235479	231	1	0.0494091	3.62816	8	51	0.0102564
increased activated T cell number	212	9.13928e-05	0.723648	0.00341344	4.5769	10	0.0156986	189	1	0.0320682	1,4,4974	7	36	0.00897436
abnormal blood vessel endothelium morphology	219	0.000111998	0.886799	0.00404931	2.92086	17	0.0266876	194	1	0.0332624	3.30421	10	70	0.0128205
absent lymphocyte	230	0.000134363	1	0.00462559	2.46815	22	0.0345369	107	0.470034	0.00439284	3.08393	16	120	0.0205128
MSIgDB Cancer Neighborhood	Species assembly: hg19	Association rule: Basal+extension: 5000 bp upstream, 1000 bp downstream, 1000000 bp max extension, curated regulatory domains included
# Term Name	Binom Rank	Binom Raw P-Value	Binom Bonferroni P-Value	Binom FDR Q-Val	Binom Fold Enrichment	Binom Observed Region Hits	Binom Region Set Coverage	Hyper Rank	Hyper Bonferroni P-Value	Hyper FDR Q-Val	Hyper Fold Enrichment	Hyper Observed Gene Hits	Hyper Total Genes	Hyper Gene Set Coverage
Neighborhood of ITGAL	1	4.8498e-10	2.07086e-07	2.07086e-07	5.93601	20	0.0313972	1	0.0459686	0.0459686	4.20536	10	55	0.0128205
MSigDB Pathways	Species assembly: hg19	Association rule: Basal+extension: 5000 bp upstream, 1000 bp downstream, 1000000 bp max extension, curated regulatory domains included
# Term Name	Binom Rank	Binom Raw P-Value	Binom Bonferroni P-Value	Binom FDR Q-Val	Binom Fold Enrichment	Binom Observed Region Hits	Binom Region Set Coverage	Hyper Rank	Hyper Bonferroni P-Value	Hyper FDR Q-Val	Hyper Fold Enrichment	Hyper Observed Gene Hits	Hyper Total Genes	Hyper Gene Set Coverage
Members of the BCR signaling pathway	2	3.91834e-07	0.00051722	0.00025861	4.83951	16	0.0251177	4	0.173694	0.0434236	4.52533	9	46	0.0115385
HIF-1-alpha transcription factor network	6	1.71344e-05	0.0226174	0.00376957	3.41088	17	0.0266876	2	0.148133	0.0740663	3.85492	11	66	0.0141026
NF-kB Signaling Pathway	9	2.35958e-05	0.0311465	0.00346072	6.0961	9	0.0141287	1	0.0349984	0.0349984	7.35938	7	22	0.00897436
GRO-seq background. Binomial FDR<0.005.
GO Molecular function, own background	Species assembly: hg19	Association rule: Basal+extension: 5000 bp upstream, 1000 bp downstream, 1000000 bp max extension, curated regulatory domains included							min set to 4
# Term Name	Hyper Rank	Hyper Raw P-Value	Hyper Bonferroni P-Value	Hyper FDR Q-Val	Hyper Fold Enrichment	Hyper Foreground Region Hits	Hyper Total Regions	Hyper Region Set Coverage	Hyper Foreground Gene Hits	Total Genes Annotated
fibronectin binding	2	1.25257e-06	0.00461947	0.00230973	6.35542	10	25	0.0156986	5	17
G-protein coupled receptor activity	3	1.26005e-06	0.00464705	0.00154902	2.09419	46	349	0.0722135	34	817
icosanoid receptor activity	5	3.44711e-06	0.0127129	0.00254259	7.47696	8	17	0.0125589	4	16
GO Biological process, own background	Species assembly: hg19	Association rule: Basal+extension: 5000 bp upstream, 1000 bp downstream, 1000000 bp max extension, curated regulatory domains included							min set to 4
# Term Name	Hyper Rank	Hyper Raw P-Value	Hyper Bonferroni P-Value	Hyper FDR Q-Val	Hyper Fold Enrichment	Hyper Foreground Region Hits	Hyper Total Regions	Hyper Region Set Coverage	Hyper Foreground Gene Hits	Total Genes Annotated
skeletal system development	1	1.75496e-10	1.83218e-06	1.83218e-06	2.3639	61	410	0.0957614	32	403
blood vessel morphogenesis	2	1.80929e-08	0.00018889	9.44451e-05	2.13536	59	439	0.0926217	39	358
artery morphogenesis	3	5.35823e-08	0.000559399	0.000186466	4.65699	17	58	0.0266876	10	48
positive regulation of MAPK cascade	5	6.71011e-07	0.00700536	0.00140107	2.04625	51	396	0.0800628	33	339
artery development	6	6.73537e-07	0.00703173	0.00117195	3.97214	17	68	0.0266876	10	55
regulation of stress fiber assembly	11	1.8166e-06	0.0189653	0.00172411	4.69434	13	44	0.0204082	5	42
leukocyte cell-cell adhesion	15	2.76252e-06	0.0288407	0.00192271	3.79428	16	67	0.0251177	8	42
regulation of endothelial cell proliferation	16	3.43648e-06	0.0358768	0.0022423	3.28133	19	92	0.0298273	10	75
activation of MAPK activity	20	4.78457e-06	0.0499509	0.00249754	2.47724	29	186	0.0455259	16	132	Bonferroni < 0.05
response to carbohydrate stimulus	23	5.30744e-06	0.0554097	0.00240912	2.74335	24	139	0.0376766	17	126
response to hexose stimulus	24	5.49287e-06	0.0573456	0.0023894	2.88883	22	121	0.0345369	15	104
regulation of epithelial cell proliferation	25	6.6028e-06	0.0689333	0.00275733	2.25088	34	240	0.0533752	20	219
regulation of actin filament bundle assembly	27	6.85805e-06	0.0715981	0.00265178	4.21533	13	49	0.0204082	5	48
positive regulation of secretion	28	7.39292e-06	0.077182	0.0027565	2.15339	37	273	0.0580848	18	231
positive regulation of cytokine secretion	29	7.53174e-06	0.0786314	0.00271143	3.53079	16	72	0.0251177	6	59
response to monosaccharide stimulus	30	8.29583e-06	0.0866085	0.00288695	2.81894	22	124	0.0345369	15	108
sprouting angiogenesis	32	8.76688e-06	0.0915262	0.00286019	4.43401	12	43	0.0188383	7	40
angiogenesis	34	1.12427e-05	0.117374	0.00345216	2.00396	42	333	0.0659341	27	274
skeletal system morphogenesis	36	1.32168e-05	0.137983	0.00383287	2.54624	25	156	0.0392465	14	191
response to glucose stimulus	37	1.44471e-05	0.150828	0.00407642	2.80386	21	119	0.032967	14	99
response to gonadotropin stimulus	42	1.65242e-05	0.172513	0.00410744	4.96517	10	32	0.0156986	6	26
embryonic heart tube morphogenesis	45	1.73948e-05	0.181602	0.0040356	3.89719	13	53	0.0204082	7	57
cell-cell adhesion	49	1.81363e-05	0.189343	0.00386415	2.09519	36	273	0.0565149	20	363
cellular response to interleukin-1	52	2.29623e-05	0.239726	0.00461012	3.58773	14	62	0.021978	10	42
cellular response to gonadotropin stimulus	53	2.30217e-05	0.240347	0.00453484	6.05278	8	21	0.0125589	4	18
axis specification	56	2.40752e-05	0.251345	0.00448831	3.10466	17	87	0.0266876	10	77
positive regulation of MAP kinase activity	58	2.69065e-05	0.280904	0.00484317	2.08277	35	267	0.0549451	22	192
Mouse phenotype, own background	Species assembly: hg19	Association rule: Basal+extension: 5000 bp upstream, 1000 bp downstream, 1000000 bp max extension, curated regulatory domains included							min set to 4
# Term Name	Hyper Rank	Hyper Raw P-Value	Hyper Bonferroni P-Value	Hyper FDR Q-Val	Hyper Fold Enrichment	Hyper Foreground Region Hits	Hyper Total Regions	Hyper Region Set Coverage	Hyper Foreground Gene Hits	Total Genes Annotated
ataxia	12	6.49472e-07	0.00514252	0.000428543	2.26191	41	288	0.0643642	22	287
abnormal intestinal lipid absorption	16	1.49511e-06	0.0118383	0.000739892	5.63787	11	31	0.0172685	4	29
abnormal leukocyte migration	20	1.79574e-06	0.0142187	0.000710933	2.54896	30	187	0.0470958	15	155
abnormal viscerocranium morphology	22	1.9568e-06	0.0154939	0.000704269	2.14572	42	311	0.0659341	26	312
abnormal systemic artery morphology	23	2.0713e-06	0.0164006	0.000713069	2.36934	34	228	0.0533752	25	217
abnormal innervation	27	3.40044e-06	0.0269247	0.000997212	2.3185	34	233	0.0533752	21	208
increased circulating aspartate transaminase level	28	3.43648e-06	0.02721	0.000971786	3.28133	19	92	0.0298273	10	71
abnormal aorta morphology	29	3.91931e-06	0.0310331	0.00107011	2.41444	31	204	0.0486656	22	186
abnormal cellular extravasation	35	5.18264e-06	0.0410361	0.00117246	4.04436	14	55	0.021978	6	50
abnormal spinal cord white matter morphology	38	5.84279e-06	0.0462632	0.00121745	4.99354	11	35	0.0172685	5	32
abnormal muscle spindle morphology	39	5.86383e-06	0.0464298	0.00119051	7.06157	8	18	0.0125589	4	19	Bonferroni < 0.05
abnormal outflow tract development	40	6.37015e-06	0.0504388	0.00126097	2.53841	27	169	0.0423862	16	129
seizures	41	6.49852e-06	0.0514553	0.00125501	2.11486	39	293	0.0612245	21	339
abnormal sensory ganglion morphology	42	6.60443e-06	0.0522939	0.00124509	2.39526	30	199	0.0470958	20	219
abnormal vitamin level	43	6.69902e-06	0.0530429	0.00123355	4.53958	12	42	0.0188383	4	51
abnormal paired-pulse facilitation	44	8.14562e-06	0.064497	0.00146584	3.90245	14	57	0.021978	8	58
abnormal dorsal root ganglion morphology	49	9.48404e-06	0.0750946	0.00153254	2.96982	20	107	0.0313972	13	120
abnormal osteoclast morphology	51	9.94006e-06	0.0787054	0.00154324	2.24069	33	234	0.0518053	17	161
abnormal circulating aspartate transaminase level	53	1.10169e-05	0.0872317	0.00164588	2.85179	21	117	0.032967	11	87
microphthalmia	57	1.37417e-05	0.108806	0.00190888	2.43745	27	176	0.0423862	16	152
abnormal spinal cord morphology	58	1.43631e-05	0.113727	0.00196081	2.09208	37	281	0.0580848	22	301
abnormal presacral vertebrae morphology	59	1.52729e-05	0.120931	0.00204967	2.42368	27	177	0.0423862	16	207
abnormal vestibular saccular macula morphology	61	1.56087e-05	0.12359	0.00202607	7.41465	7	15	0.010989	5	21
abnormal cervical vertebrae morphology	62	1.66181e-05	0.131583	0.0021223	2.95963	19	102	0.0298273	10	117
abnormal nervous system electrophysiology	65	1.96622e-05	0.155685	0.00239516	2.08754	36	274	0.0565149	20	285
abnormal eye size	66	2.00943e-05	0.159107	0.00241071	2.30384	29	200	0.0455259	18	170
abnormal cell chemotaxis	67	2.06777e-05	0.163726	0.00244368	2.48258	25	160	0.0392465	15	125
abnormal leukocyte tethering or rolling	68	2.23855e-05	0.177248	0.00260659	4.81471	10	33	0.0156986	4	34
abnormal vascular regression	69	2.29623e-05	0.181815	0.00263501	3.58773	14	62	0.021978	8	40
abnormal coronary vessel morphology	74	2.75022e-05	0.217763	0.00294274	3.35673	15	71	0.0235479	8	54
abnormal digestion	75	2.91252e-05	0.230613	0.00307485	2.94839	18	97	0.0282575	10	113
abnormal jaw morphology	78	3.29327e-05	0.260761	0.00334309	2.14529	32	237	0.0502355	21	249
abnormal intestinal epithelium morphology	80	3.68069e-05	0.291437	0.00364296	2.07773	34	260	0.0533752	19	219
abnormal vitamin homeostasis	82	3.72095e-05	0.294625	0.00359298	3.89107	12	49	0.0188383	4	60
abnormal spinal cord ventral horn morphology	83	3.95843e-05	0.313428	0.00377624	4.53958	10	35	0.0156986	4	21
convulsive seizures	90	4.7956e-05	0.379716	0.00421906	2.46916	23	148	0.0361067	13	153
abnormal otolith organ morphology	92	4.87342e-05	0.385877	0.00419432	3.56122	13	58	0.0204082	9	59
delayed wound healing	95	5.42001e-05	0.429157	0.00451744	3.17771	15	75	0.0235479	10	59
abnormal cervical atlas morphology	97	5.70096e-05	0.451402	0.00465363	3.73848	12	51	0.0188383	6	48
abnormal sympathetic ganglion morphology	98	5.76696e-05	0.456628	0.00465947	3.31999	14	67	0.021978	7	43
abnormal lung vasculature morphology	100	5.8459e-05	0.462878	0.00462878	2.80386	18	102	0.0282575	10	92
abnormal superior cervical ganglion morphology	101	5.89686e-05	0.466914	0.00462291	3.50087	13	59	0.0204082	6	31
abnormal thymus involution	106	6.5334e-05	0.517315	0.00488033	6.17888	7	18	0.010989	4	16
abnormal heart position or orientation	109	6.69738e-05	0.530298	0.00486512	4.2942	10	37	0.0156986	5	43
MSigDB pathways	Species assembly: hg19	Association rule: Basal+extension: 5000 bp upstream, 1000 bp downstream, 1000000 bp max extension, curated regulatory domains included							min set to 2
# Term Name	Hyper Rank	Hyper Raw P-Value	Hyper Bonferroni P-Value	Hyper FDR Q-Val	Hyper Fold Enrichment	Hyper Foreground Region Hits	Hyper Total Regions	Hyper Region Set Coverage	Hyper Foreground Gene Hits	Total Genes Annotated
Genes involved in Class A/1 (Rhodopsin-like receptors)	1	4.83552e-07	0.000638289	0.000638289	2.60735	32	195	0.0502355	19	298
Neuroactive ligand-receptor interaction	2	2.95411e-06	0.00389943	0.00194972	2.58651	28	172	0.043956	16	271
T Cell Signal Transduction	3	8.91214e-06	0.011764	0.00392134	3.33463	17	81	0.0266876	8	45	FDR < 0,005
Genes involved in GPCR ligand binding	4	1.94361e-05	0.0256557	0.00641393	2.11444	35	263	0.0549451	23	399
Beta1 integrin cell surface interactions	5	2.29623e-05	0.0303102	0.00606204	3.58773	14	62	0.021978	7	66
Cancer neighborhood, own background	Species assembly: hg19	Association rule: Basal+extension: 5000 bp upstream, 1000 bp downstream, 1000000 bp max extension, curated regulatory domains included
# Term Name	Hyper Rank	Hyper Raw P-Value	Hyper Bonferroni P-Value	Hyper FDR Q-Val	Hyper Fold Enrichment	Hyper Foreground Region Hits	Hyper Total Regions	Hyper Region Set Coverage	Hyper Foreground Gene Hits	Total Genes Annotated
Neighborhood of ITGAL	1	1.38612e-06	0.000591873	0.000591873	3.34496	20	95	0.0313972	10	55
Neighborhood of CD7	2	2.07053e-06	0.000884118	0.000442059	5.01743	12	38	0.0188383	7	38
