# Supplementary material for: Genome-wide repression of eRNA and target gene loci by the ETV6-RUNX1 fusion in acute leukemia
Source: HighWire-hosted journal article supplement (doi:10.1101/gr.193649.115), 2016-09-12
Supplement: Supplemental_Table_S7.xlsx [file Supplemental_Table_S7.xlsx]

## Sheet: Table S7. Sheet 1
Table S7. Differentially expressed genes among E/R-positive patients compared to other pre-B ALL subtypes in the combined patient microarray data set.
Entrez	Symbol	GRO-seq: log2FC (Nalm6-E/R vs. Nalm6-LUC)	microarray: log2FC (E/R+ vs. other subtypes)	microarray: q-value (E/R+ vs. other subtypes)	same direction in GRO-seq and microarray	RNA-seq (GSE79373): log2FC (E/R+ vs. other subtypes)	RNA_seq: log2FC	RNA_seq: adj. p-value	adj. p-value < 0.05	Same direction in GRO-seq and RNA-seq
162	AP1B1	0.551177	0.679779	9.46447e-23	1	AP1B1	1.46955	4.75013e-12	1	1	1
22809	ATF5	0.59866	0.517317	4.15591e-14	1	ATF5	0.721268	0.0680842	1	1	1
23400	ATP13A2	-0.934117	-1.12119	2.50092e-48	1	ATP13A2	-0.971751	0.00352332	1	1	1
23400	ATP2A3	-0.934117	-1.12119	2.50092e-48	1	ATP2A3	0.49245	0.117995	0	0	0
60468	BACH2	0.530862	1.05092	5.59583e-11	1	BACH2	0.402001	0.307776	0	1	0
79603	CERS4	0.505081	0.548647	6.67192e-28	1	-	-	-	-	-	-
55501	CHST12	-0.574433	-1.11884	4.10848e-41	1	CHST12	-1.14136	1.01731e-05	1	1	1
161198	CLEC14A	-0.637309	-1.56008	6.56812e-21	1	CLEC14A	-0.842908	0.158793	0	1	0
29121	CLEC2D	-0.659347	-1.6686	8.57201e-35	1	CLEC2D	-0.712047	0.0275091	1	1	1
112616	CMTM7	-0.524189	1.09564	8.20202e-20	0	CMTM7	1.14047	8.37865e-05	1	0	0
199786	FAM129C	-1.06526	-0.536535	3.30519e-08	1	FAM129C	-0.585122	0.0365215	1	1	1
23149	FCHO1	-0.629818	-0.713817	2.85672e-31	1	FCHO1	-0.495177	0.117995	0	1	0
2356	FPGS	-0.576841	-0.502316	1.06354e-17	1	FPGS	-0.226942	0.281119	0	1	0
84941	HSH2D	-0.677653	-1.51813	2.74946e-36	1	HSH2D	-0.713609	0.00783472	1	1	1
3428	IFI16	0.630586	0.678691	3.44333e-17	1	IFI16	0.343046	0.179402	0	1	0
50615	IL21R	-0.553045	-0.633456	2.25401e-10	1	IL21R	-1.12501	0.000945903	1	1	1
3676	ITGA4	-0.566483	-0.958404	8.35438e-25	1	ITGA4	0.0832634	0.702602	0	0	0
80183	KIAA0226L	1.05472	3.55045	2.58612e-58	1	-	-	-	-	-	-
3903	LAIR1	-0.648945	0.73534	8.79051e-13	0	LAIR1	0.728387	0.00266556	1	0	0
7462	LAT2	-1.69102	-0.648494	7.7872e-30	1	LAT2	-0.861737	0.000300398	1	1	1
414332	LCN10	-1.69204	-0.817148	6.48807e-15	1	LCN10	-2.65037	8.99448e-10	1	1	1
374443	LOC374443	-0.604282	-1.08194	1.16831e-31	1	-	-	-	-		-
64780	MICAL1	-0.809381	-0.914047	3.1545e-31	1	MICAL1	-0.597552	0.00643534	1	1	1
84700	MYO18A	-0.617589	0.797138	1.42831e-21	0	MYO18A	0.15241	0.519656	0	0	0
84700	MYO18B	-0.617589	0.797138	1.42831e-21	0	MYO18B	0.758252	0.266753	0	0	0
375387	NRROS	-1.04787	-0.992139	7.6692e-18	1	-	-	-	-	-	-
5142	PDE4B	0.51126	0.636854	5.75477e-06	1	PDE4B	0.227461	0.519656	0	1	0
5450	POU2AF1	0.524924	1.42274	9.07842e-26	1	POU2AF1	1.32919	1.01051e-09	1	1	1
5499	PPP1CA	-0.994784	-0.571135	1.28068e-22	1	PPP1CA	-0.0238575	0.936641	0	1	0
5729	PTGDR	0.656313	1.4348	4.11549e-25	1	PTGDR	2.032	3.82169e-07	1	1	1
5790	PTPRCAP	-1.37685	-0.554475	1.22913e-12	1	PTPRCAP	-0.129176	0.702602	0	1	0
10235	RASGRP2	-1.64908	-0.595001	2.65944e-18	1	RASGRP2	-0.47051	0.0577866	1	1	1
157285	SGK223	0.570096	0.551314	1.61166e-05	1	-	-	-	-	-	-
6711	SPTBN1	0.521681	0.70922	8.01779e-17	1	SPTBN1	1.12724	1.01731e-05	1	1	1
220930	ZEB1-AS1	-1.06605	0.678936	3.41378e-13	0	-	-	-	-	-	-
					30				17	23	15
						6 gene symbols were not found in the RNA-seq dataset

## Sheet: Table S7. Sheet2. RNAseq counts
Table S7. RNA-seq normalized count data (GSE79373).
	t12;21	t12;21	t12;21	t12;21	t12;21	t12;21	t12;21	t12;21	t12;21	other	other	other	other	other	other	other	other
	ALL3	ALL11	ALL15	ALL8	ALL12	ALL16	ALL1	ALL9	ALL13	ALL-1	ALL7	ALL0	ALL5	ALL2	ALL6	ALL14	ALL4
Gene_name /File	X413_T_RNASeq	X732_T_RNASeq_LLA7	X854_T_RNASeq	X691_T_RNASeq	X814_T_RNASeq	X856_T_RNASeq	X373_T_RNASeq	X696_T_RNASeq	X817_T_RNASeq	X315_T_RNASeq	X670_T_RNASeq	X327_T_RNASeq	X442_T_RNASeq	X39_T_RNASeq	X659_T_RNASeq	X819_T_RNASeq	X41_T_RNASeq
AP1B1	4142.93	2871.35	2138.62	2390.94	3816.49	2669.16	2607.97	2564.11	2844.58	1359.37	937.023	1608.26	1124.55	1141.38	661.46	680.649	765.785
ATF5	94.4288	59.7669	86.7931	142.923	228.236	115.882	179.571	109.01	167.848	218.089	60.2559	68.7983	35.6566	65.0151	21.5693	61.8193	83.119
ATP13A2	144.357	115.719	139.454	106.587	474.512	177.686	149.363	117.304	102.697	368.393	333.591	440.309	361.366	491.225	225.579	263.847	299.773
ATP2A3	1486.98	3708.09	2508.22	1969.43	3860.41	3315.2	3975.73	2043.94	2069.39	1349.06	1994.56	3643.07	1492.09	3604.73	1511.65	1560.14	731.72
BACH2	3509.06	7212.72	10057.3	4215.03	2519.23	5630.92	3297.72	6715.97	4261.35	1213.49	2696.67	1831.65	1925.46	2005.36	2177.6	9662.29	8708.42
CHST12	34.7324	34.3342	57.537	55.7159	49.412	63.7354	35.2429	21.3281	57.4217	142.937	110.033	110.077	125.484	131.475	80.885	64.3685	66.7677
CLEC14A	122.649	86.4712	347.172	359.731	31.3727	149.682	312.151	10.664	305.881	1268.01	534.444	9.71271	220.797	98.2451	162.669	198.204	588.646
CLEC2D	1514.12	1294.52	1147.81	1507.96	901.965	1155.93	1006.94	2040.39	1191.5	737.524	1915.09	1087.82	2696.19	1256.96	2284.55	4932.8	2316.43
CMTM7	768.455	2618.3	1229.73	912.044	895.69	2136.1	1621.17	1688.47	1033.59	315.345	394.72	484.826	669.933	642.927	642.587	981.461	838.003
FAM129C	945.374	1664.57	1693.93	707.349	898.043	1486.19	1572.5	2734.73	2229.51	2513.92	2145.63	2592.48	1339.18	3194.41	1697.69	2196.82	3033.16
FCHO1	116.137	73.7548	90.6939	53.2934	165.491	146.784	151.041	61.6144	71.7771	112.728	109.159	225.011	110.398	222.496	124.922	110.892	192.127
FPGS	2152.33	1143.2	1485.23	1218.48	1134.91	1257.32	1485.23	1336.56	1485.23	2239.83	2084.51	1485.23	1485.23	1485.23	1445.15	1194.32	1838.16
HSH2D	380.971	658.707	339.371	390.011	287.06	512.78	624.302	502.394	395.326	876.776	709.972	1184.14	1156.1	544.682	833.116	436.559	406.057
IFI16	3391.84	6272.98	4253.84	6991.13	3119.23	3942.9	4464.09	5053.57	2574.04	3182.18	5026.57	2865.25	4293.19	3349	3765.65	3686.85	1625.59
IL21R	64.0379	38.1491	40.9585	50.871	112.157	85.9462	33.5646	54.5051	113.739	235.035	96.0602	212.87	78.8559	199.38	219.288	116.628	64.0425
IL21R_2	5.42694	12.7164	10.7272	12.1121	11.7648	18.3481	5.03469	11.8489	8.83411	8.84144	10.4793	16.1878	6.17133	10.1135	8.0885	5.0985	12.2635
ITGA4	7233.03	9689.86	11221.7	11006.3	5203.95	5534.35	8644.57	11899.9	6777.97	4828.16	7971.25	6573.88	9473.68	6604.09	9269.42	11374.1	7971.25
LAIR1	4719.27	3467.75	3461	4056.36	1650.99	3922.62	5518.02	3689.76	4637.91	1785.23	2480.97	2336.72	3237.89	3077.38	2171.31	1962.92	1684.18
LAT2	3606.75	1478.91	2271.25	3286.02	1920.01	1798.11	2414.97	1555.76	3253.16	3664.78	3937.59	4798.08	5096.84	3347.56	5599.04	3580.42	5664.35
LCN10	211.651	237.796	76.0659	66.6168	327.06	169.961	78.8769	45.0259	87.2368	590.166	629.631	1486.04	999.756	1222.28	2256.69	1653.83	84.4816
MICAL1	3928.02	3690.29	3141.13	3917.07	3831.39	2814.01	2866.42	2381.63	3393.4	3069.45	4977.66	5983.84	3924.97	9180.14	5601.74	4159.1	3978.81
MYO18A	8569.14	11133.2	9996.81	7274.55	7341.21	11555.4	11519.4	8569.14	8764.54	7668.48	9802.5	13155.1	7653.83	14560.5	6234.44	4226.65	5348.23
MYO18B	2658.12	6079.69	4923.8	767.91	1672.95	3486.13	221.527	5456.43	3764.43	3320.7	55.0163	2300.29	3399.03	3133.73	88.9735	121.089	243.907
POU2AF1	667.514	1696.36	1643.22	1291.15	1374.12	1463.02	1592.64	1155.27	708.937	408.917	627.884	575.478	592.448	473.888	354.097	537.254	451.023
PPP1CA	2636.41	704.486	813.32	1491	1165.5	798.623	731.709	939.62	1530.51	1133.18	787.693	866.05	1119.75	674.713	1129.69	1087.89	2887.36
PTGDR	293.055	775.697	259.404	528.089	311.374	335.093	511.86	792.693	115.948	243.876	114.399	85.7956	64.4562	37.5643	56.6195	103.882	35.4278
PTPRCAP	1541.25	450.159	417.387	661.323	605.493	532.094	337.324	524.907	1604.5	1147.18	689.887	628.088	890.044	582.247	855.584	771.785	936.111
RASGRP2	2328.16	1623.88	1349.68	1102.21	1820.4	1051.63	1349.3	920.662	1478.61	1623.88	1581.5	2449.22	1948.08	3323	2246.81	1910.66	1199.09
SPTBN1	28544.6	25018.2	24197.7	41021.4	21655.8	21536.8	22357.4	21514.1	16374	9337.3	9391.19	8527.76	10952.1	7213.79	7037.9	12115.3	22702.4
